# Supplementary material
Source: Royal Society of Chemistry journal article supplement (doi:10.1039/d6cc01226d)
Supplement: d6cc01226d1.pdf [file d6cc01226d1.pdf]

## Supporting Information

Frederic Seeger, Liesa Renz, Lars Wesemann

Tetrylidyne Coordination Modes: Vinyl-Type Germa-Ruthena Anion [Ru=Ge:]<sup>-</sup> and its Reaction with Monofluorobenzene

## Content

|                                                |    |
|------------------------------------------------|----|
| Experimental.....                              | 2  |
| Data of crystal structure determinations ..... | 10 |
| NMR spectroscopy .....                         | 11 |
| NMR spectra of compound <b>2</b> .....         | 11 |
| NMR spectra of compound <b>3a</b> .....        | 15 |
| NMR spectra of compound <b>3b</b> .....        | 19 |
| NMR spectra of compound <b>4</b> .....         | 23 |
| NMR spectra of compound <b>5</b> .....         | 27 |
| NMR spectra of compound <b>6</b> .....         | 32 |
| NMR spectra of compound <b>7</b> .....         | 37 |
| UV-Vis spectroscopy.....                       | 41 |
| Quantum chemical calculations .....            | 46 |
| Calculation of Excited state spectra .....     | 47 |
| References.....                                | 61 |

## Experimental

**General information.** All manipulations were performed under argon (99.999 %) atmosphere using standard Schlenk techniques or an MBraun glovebox. Additionally, the argon for Schlenk techniques is dried through SICAPENT®. All solvents were degassed via three “freeze-pump-thaw” cycles and dried with various methods. *n*-Hexane and *n*-pentane were obtained from an MBRAUN solvent purification system (SPS). Diethyl ether, tetrahydrofuran and toluene were obtained from a MBraun solvent purification system (SPS) and analogous to benzene-*d*<sub>6</sub> and toluene-*d*<sub>8</sub> distilled from a Na/K alloy. Benzene, benzene-*d*<sub>6</sub> and *o*-difluorobenzene were dried over activated aluminium oxide. [Ar\*GeCl]<sub>2</sub> and [(Ph<sub>3</sub>P)ClRuGeCl<sub>2</sub>(C<sub>6</sub>H<sub>3</sub>-2- $\eta^6$ -Trip)-6-Trip)] were synthesized according to literature procedures.<sup>1, 2</sup> Commercially purchased chemicals (*sigma aldrich*, *abcr* and *apollo scientific*) were used as received. All air and moisture sensitive chemicals were stored under argon atmosphere.

**NMR spectroscopy.** NMR spectra were recorded using one of the following spectrometers with the respective equipment:

- Bruker Avance III HD 300 NanoBay Spectrometer, 5 mm BBFO ATM probe head, operating at 300.13 (<sup>1</sup>H), 75.47 (<sup>13</sup>C), 282.40 (<sup>19</sup>F) and 121.49 (<sup>31</sup>P) MHz.
- Bruker AVII+400, 5 mm H-1,X+F-19 BBFO ATM head (Quad Systems), operating at 400.11 (<sup>1</sup>H), 100.61 (<sup>13</sup>C), 376.48 (<sup>19</sup>F) and 161.97 (<sup>31</sup>P) MHz.
- Bruker AVII+500, 5 mm TBO probe head operating at 500.13 (<sup>1</sup>H) MHz.
- Bruker Avance III HDX 600, 5 mm Prodigy BBO Cryo probe head, operating at 600.13 (<sup>1</sup>H), 150.92 (<sup>13</sup>C), 564.63 (<sup>19</sup>F) MHz.
- Bruker Avance III HDX 700, 5 mm TXI probe head operating at 700.29 (<sup>1</sup>H), 176.09 (<sup>13</sup>C) MHz.

Chemical shifts are reported as  $\delta$  in ppm relative to the following external standards: Me<sub>4</sub>Si (<sup>1</sup>H, <sup>13</sup>C), BF<sub>3</sub>·Et<sub>2</sub>O (<sup>11</sup>B), CCl<sub>3</sub>F (<sup>19</sup>F), 85% H<sub>3</sub>PO<sub>4</sub> (<sup>31</sup>P).<sup>3</sup> The chemical shifts were referenced using the chemical shift of the solvents <sup>2</sup>H resonance frequency as followed:  $\Xi = 25.145020$  % for <sup>13</sup>C,  $\Xi = 94.094011$  % for <sup>19</sup>F,  $\Xi = 40.480742$  for <sup>31</sup>P.<sup>3</sup> The multiplicity of the signals is abbreviated as s = singlet, d = doublet, t = triplet, sept = septet and m = multiplet or br = broad/unresolved. The proton and carbon signals were assigned via detailed analysis of <sup>1</sup>H, <sup>13</sup>C{<sup>1</sup>H} UDEFT, <sup>13</sup>C{<sup>1</sup>H} DEPT135, <sup>13</sup>C{<sup>19</sup>F}, <sup>1</sup>H-<sup>1</sup>H COSY, <sup>1</sup>H-<sup>13</sup>C HSQC and <sup>1</sup>H-<sup>13</sup>C HMBC NMR spectra.

**Crystal structure determination.** X-ray data were collected with a Bruker Smart APEX II diffractometer with graphite monochromated Mo-K $\alpha$  radiation. Programs used were Bruker APEX2 v2011.8-0 including SADABS for absorption correction, SAINT for data reduction, SHELXS for structure solution and SHELXL or WinGX suite of programs v1.70.01 including SHELXL for structure refinement.<sup>4-10</sup>

UV/Vis spectroscopy. The absorption spectrum was recorded on a PerkinElmer *Lambda 35* spectrophotometer in 1 cm quartz cuvettes sealed by Teflon stoppers or Teflon lined screw caps.

Elemental analysis. The elemental analysis was performed at the Department for Inorganic Chemistry at the University of Tübingen using a vario MICRO CUBE or UNICUBE by *elementar*.

Compound 2: Ar\*GeClRuPPh<sub>3</sub>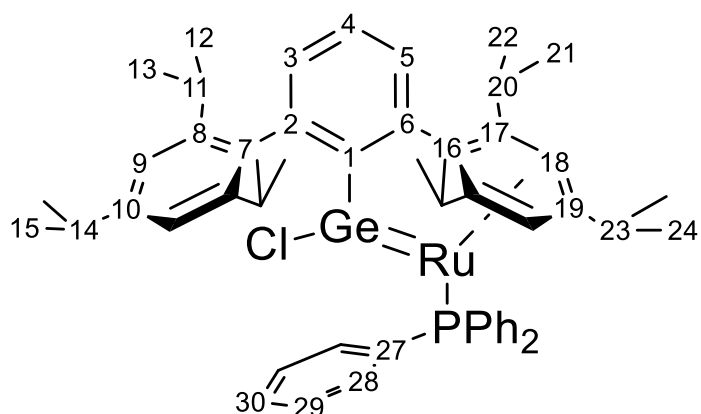

To a mixture of Ar\*GeCl<sub>2</sub>RuClPPh<sub>3</sub>·0.5 C<sub>7</sub>H<sub>8</sub> (0.500 g, 0.468 mmol, 1.0 eq.) and KC<sub>8</sub> (168 mg, 1.24 mmol, 2.7 eq.) benzene (4 ml) was added at room temperature. After stirring the reaction mixture for 90 minutes the volatiles were removed under reduced pressure from the blue suspension. The product was extracted with benzene (2 ml), the volatiles were removed under reduced pressure and the solid was coevaporated with frozen benzene (2 ml). The product was crystallized from a highly saturated benzene solution at room temperature to yield Ar\*GeClRuPPh<sub>3</sub> · 2 C<sub>6</sub>H<sub>6</sub> (0.431 g, 0.388 mmol, 83 %) as blue crystals suitable for X-ray diffraction. **Characterization:** **<sup>1</sup>H-NMR** (400.11 MHz, C<sub>6</sub>D<sub>6</sub>, 300.00 K): δ = 0.74 (d, 6H, <sup>3</sup>J<sub>H-H</sub> = 6.8 Hz, H-24), 1.19 (d, 6H, <sup>3</sup>J<sub>H-H</sub> = 6.8 Hz, H-12), 1.23 (d, 6H, <sup>3</sup>J<sub>H-H</sub> = 6.9 Hz, H-15), 1.25 (d, 6H, <sup>3</sup>J<sub>H-H</sub> = 6.8 Hz, H-21), 1.34 (d, 6H, <sup>3</sup>J<sub>H-H</sub> = 6.8 Hz, H-22), 1.36 (d, 6H, <sup>3</sup>J<sub>H-H</sub> = 6.8 Hz, H-13), 1.62 (sept, 1H, <sup>3</sup>J<sub>H-H</sub> = 6.8 Hz, H-23), 2.46 (sept, 2H, <sup>3</sup>J<sub>H-H</sub> = 6.7 Hz, H-20), 2.83 (sept, 1H, <sup>3</sup>J<sub>H-H</sub> = 6.4 Hz, H-14), 2.93 (sept, 2H, <sup>3</sup>J<sub>H-H</sub> = 6.9 Hz, H-11), 5.31 (s, 2H, H-18), 6.96 (m, 3H, H-30), 7.04 (m, 6H, H-29), 7.14 (m, 1H, H-3), 7.15 (s, 2H, H-9), 7.18 (m, 1H, H-4), 7.74 (m, 1H, H-5), 7.82 (m, 6H, H-28) ppm. **<sup>13</sup>C{<sup>1</sup>H}-NMR** (100.61 MHz, C<sub>6</sub>D<sub>6</sub>, 300.00 K): δ = 22.8 (s, C-24), 23.5 (s, C-13), 24.1 (s, C-15), 24.4 (s, C-22), 24.5 (s, C-12), 26.5 (s, C-21), 30.2 (s, C-20), 30.5 (s, C-23), 30.9 (s, C-11), 34.5 (s, C-14), 73.8 (s, C-18), 98.0 (d, J<sub>P-C</sub> = 9.9 Hz, C-16), 110.3 (s, C-19), 115.7 (d, J<sub>P-C</sub> = 3.8 Hz, C-17), 120.4 (s, C-9), 126.7 (s, C-4), 126.8 (s, C-5), 127.0 (d, <sup>3</sup>J<sub>P-C</sub> = 9.4 Hz, C-29), 128.3 (d, <sup>4</sup>J<sub>P-C</sub> = 5.3 Hz, C-30), 130.5 (s, C-3), 134.2 (d, <sup>2</sup>J<sub>P-C</sub> = 12.9 Hz, C-28), 136.8 (s, C-7), 139.2 (s, C-6), 141.0 (d, <sup>1</sup>J<sub>P-C</sub> = 38.3 Hz, C-27), 141.8 (s, C-2), 145.7 (s, C-8), 147.9 (s, C-10), 172.2 (d, <sup>3</sup>J<sub>P-C</sub> = 16.5 Hz, C-1) ppm. **<sup>31</sup>P{<sup>1</sup>H}-NMR** (161.97 MHz, C<sub>6</sub>D<sub>6</sub>, 300.00 K): δ = 56.0 (s) ppm. **UV-Vis** (n-pentane, c = 10.8 μmol · l<sup>-1</sup>): λ (nm) [ε (l · mol<sup>-1</sup> · cm<sup>-1</sup>)]: 309 [88237], 622 [21800]. **Elemental analysis** calculated for C<sub>54</sub>H<sub>64</sub>ClGePRu (%): C 68.04, H 6.77 Found: C 68.55, H 6.42

Compound **3a**: Ar\*GeKRuPPh<sub>3</sub>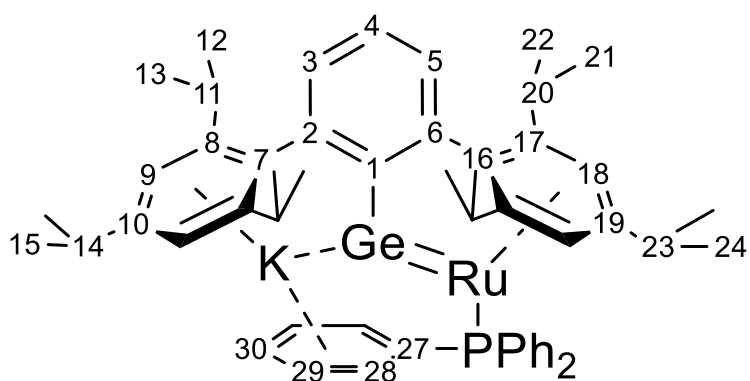

To a mixture of Ar\*GeCl<sub>2</sub>RuClPPh<sub>3</sub> (0.456 g, 0.445 mmol, 1.0 eq.) and KC<sub>8</sub> (302 mg, 2.23 mmol, 5.0 eq.) thf (9 ml) was added at room temperature. After stirring the reaction mixture for one hour the volatiles were removed under reduced pressure from the dark green suspension. The product was extracted with pentane (10 ml), the volatiles were removed under reduced pressure and the solid was coevaporated with pentane (5 times 2 ml) and frozen benzene (3 times 2 ml). The product was crystallized from a concentrated toluene solution at -40 °C to yield Ar\*GeKRuPPh<sub>3</sub> · 0.5 C<sub>7</sub>H<sub>8</sub> (0.387 g, 0.193 mmol, 87 %) as dark green crystals suitable for X-ray diffraction. **Characterization:** **<sup>1</sup>H-NMR** (400.11 MHz, C<sub>6</sub>D<sub>6</sub>, 300.00 K): δ = 0.85 (d, 6H, <sup>3</sup>J<sub>H-H</sub> = 6.7 Hz, H-12), 0.88 (d, 6H, <sup>3</sup>J<sub>H-H</sub> = 6.9 Hz, H-15), 0.99 (d, 6H, <sup>3</sup>J<sub>H-H</sub> = 6.9 Hz, H-24), 1.07 (d, 6H, <sup>3</sup>J<sub>H-H</sub> = 6.9 Hz, H-13), 1.31 (d, 6H, <sup>3</sup>J<sub>H-H</sub> = 7.0 Hz, H-22), 1.60 (d, 6H, <sup>3</sup>J<sub>H-H</sub> = 6.8 Hz, H-21), 2.36 (sept, 1H, <sup>3</sup>J<sub>H-H</sub> = 6.8 Hz, H-23), 2.43 (sept, 1H, <sup>3</sup>J<sub>H-H</sub> = 6.9 Hz, H-14), 2.85 (sept, 2H, <sup>3</sup>J<sub>H-H</sub> = 6.8 Hz, H-20), 3.23 (sept, 2H, <sup>3</sup>J<sub>H-H</sub> = 6.8 Hz, H-14), 5.17 (s, 2H, H-18), 6.65 (s, 2H, H-9), 6.86 (m, 3H, H-30), 7.05 (m, 6H, H-29), 7.14 (m, 1H, H-3), 7.27 (m, 1H, H-4), 8.14 (m, 6H, H-28), 8.15 (m, 1H, H-5) ppm. **<sup>13</sup>C{<sup>1</sup>H}-NMR** (100.61 MHz, C<sub>6</sub>D<sub>6</sub>, 300.00 K): δ = 23.0 (s, C-12), 23.9 (s, C-13), 23.9 (s, C-24), 24.1 (s, C-15), 25.4 (s, C-22), 26.9 (s, C-21), 30.1 (s, C-11), 30.3 (s, C-20), 32.8 (s, C-23), 33.7 (s, C-14), 73.9 (s, C-18), 103.1 (d, J<sub>P-C</sub> = 12.6 Hz, C-16), 106.9 (s, C-19), 112.3 (d, J<sub>P-C</sub> = 3.7 Hz, C-17), 118.4 (s, C-9), 123.5 (s, C-4), 125.6 (d, <sup>3</sup>J<sub>P-C</sub> = 8.4 Hz, C-29), 126.2 (s, C-30), 126.3 (s, C-3), 128.3 (s, C-5), 135.2 (d, <sup>2</sup>J<sub>P-C</sub> = 12.9 Hz, C-28), 140.5 (s, C-2), 144.9 (s, C-6), 145.6 (s, C-10), 145.9 (s, C-7), 146.7 (d, <sup>1</sup>J<sub>P-C</sub> = 26.8 Hz, C-27), 148.6 (s, C-8), 181.9 (d, <sup>3</sup>J<sub>P-C</sub> = 16.5 Hz, C-1) ppm. **<sup>31</sup>P{<sup>1</sup>H}-NMR** (161.97 MHz, C<sub>6</sub>D<sub>6</sub>, 300.00 K): δ = 54.6 (s) ppm. **UV-Vis** (n-pentane, c = 12.5 μmol · l<sup>-1</sup>): λ (nm) [ε (l · mol<sup>-1</sup> · cm<sup>-1</sup>)]: 366 [37819], 598 [13962]. **Elemental analysis** calculated for C<sub>54</sub>H<sub>64</sub>GeKRu + 0.5 C<sub>7</sub>H<sub>8</sub>(%): C 68.86, H 6.83 Found: C 69.00, H 6.44.

Compound **3b**: [Ar\*GeRuPPh<sub>3</sub>][K(18-c-6)<sub>2</sub>]

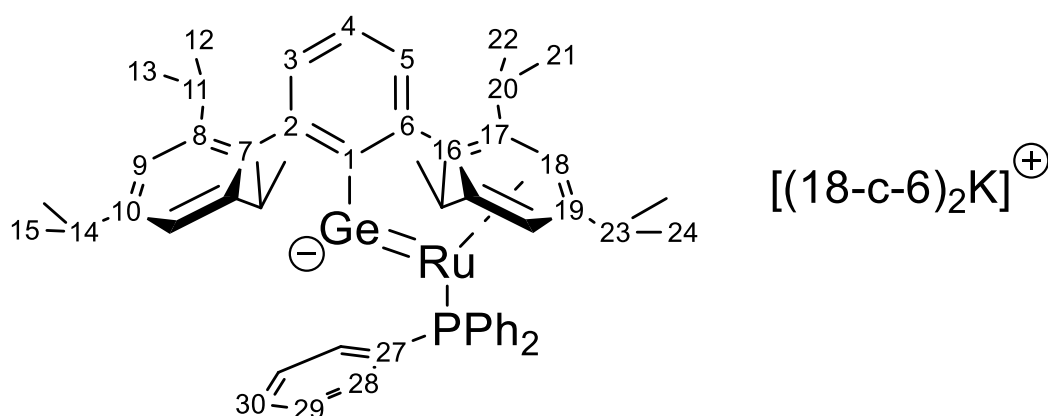

To a mixture of Ar\*GeRuPPh<sub>3</sub> (36.2.0 mg, 37.8  $\mu$ mol, 1.0 eq.) and 18-c-6 (20.0 mg, 75.7  $\mu$ mol, 2.0 eq.) benzene (4 ml) was added at room temperature. After stirring the reaction mixture for 90 minutes the volatiles were removed under reduced pressure from the dark green suspension. The product was extracted with benzene (2 ml), the volatiles were removed under reduced pressure and the solid was coevaporated with frozen benzene (2 ml). The product was crystallized from a saturated toluene solution at  $-40$   $^{\circ}$ C to yield [Ar\*GeRuPPh<sub>3</sub>][K(18-c-6)<sub>2</sub>] (51.0 mg, 34.3  $\mu$ mol, 91 %) as dark green crystals suitable for X-ray diffraction. **<sup>1</sup>H-NMR** (400.11 MHz, C<sub>6</sub>D<sub>6</sub>, 300.00 K):  $\delta$  = 0.94 (d, 6H, <sup>3</sup>J<sub>H-H</sub> = 6.8 Hz, H-24), 1.30 (d, 6H, <sup>3</sup>J<sub>H-H</sub> = 7.5 Hz, H-12), 1.31 (d, 6H, <sup>3</sup>J<sub>H-H</sub> = 7.0 Hz, H-15), 1.37 (d, 6H, <sup>3</sup>J<sub>H-H</sub> = 6.9 Hz, H-13), 1.41 (d, 6H, <sup>3</sup>J<sub>H-H</sub> = 7.0 Hz, H-21), 1.68 (d, 6H, <sup>3</sup>J<sub>H-H</sub> = 6.8 Hz, H-22), 1.73 (sept, 1H, <sup>3</sup>J<sub>H-H</sub> = 6.7 Hz, H-23), 2.89 (sept, 1H, <sup>3</sup>J<sub>H-H</sub> = 7.0 Hz, H-14), 3.13 (s, 48H, H-18-c-6), 3.17 (sept, 2H, <sup>3</sup>J<sub>H-H</sub> = 6.9 Hz, H-20), 3.66 (sept, 2H, <sup>3</sup>J<sub>H-H</sub> = 6.9 Hz, H-11), 5.21 (s, 2H, H-18), 7.02 (m, 3H, H-30), 7.10 (s, 2H, H-9), 7.17 (m, 6H, H-29), 7.36 (m, 1H, H-3), 7.48 (m, 1H, H-4), 8.31 (m, 1H, H-5), 8.48 (m, 6H, H-28) ppm. **<sup>13</sup>C{<sup>1</sup>H}-NMR** (100.61 MHz, C<sub>6</sub>D<sub>6</sub>, 300.00 K):  $\delta$  = 23.6 (s, C-24), 23.7 (s, C-12), 24.3 (s, C-15), 24.6 (s, C-13), 25.2 (s, C-21), 27.5 (s, C-22), 30.4 (s, C-11), 30.5 (s, C-20), 31.3 (s, C-23), 34.5 (s, C-14), 70.2 (s, C-18-c-6), 73.6 (s, C-18), 104.5 (d, <sup>1</sup>J<sub>P-C</sub> = 12.8 Hz, C-16), 106.3 (s, C-19), 109.9 (s, C-17), 119.2 (s, C-9), 122.2 (s, C-4), 125.6 (s, C-30), 125.8 (d, <sup>3</sup>J<sub>P-C</sub> = 7.2 Hz, C-29), 127.5 (s, C-3), 127.9 (s, C-5), 135.3 (d, <sup>2</sup>J<sub>P-C</sub> = 12.9 Hz, C-28), 143.5 (s, C-6), 143.9 (s, C-2), 144.2 (s, C-7), 144.3 (s, C-10), 146.6 (s, C-8), 148.2 (d, <sup>1</sup>J<sub>P-C</sub> = 21.8 Hz, C-27), 183.5 (d, <sup>3</sup>J<sub>P-C</sub> = 17.0 Hz, C-1) ppm. **<sup>31</sup>P{<sup>1</sup>H}-NMR** (161.97 MHz, C<sub>6</sub>D<sub>6</sub>, 300.00 K):  $\delta$  = 48.8 (s) ppm. **Elemental analysis** calculated for C<sub>78</sub>H<sub>112</sub>GeKO<sub>12</sub>PRu (%): C 63.07, H 7.60 Found: C 63.45, H 7.15.

Compound 4: Ar\*Ge(AuPPh<sub>3</sub>)RuPPh<sub>3</sub>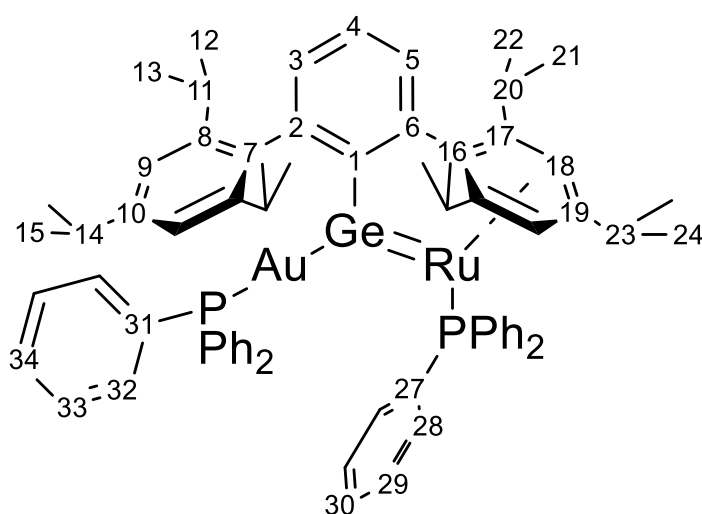

A mixture of Ar\*GeKRuPPh<sub>3</sub> (50.2 mg, 52.5 μmol, 1.0 eq.) and AuCl(PPh<sub>3</sub>) (27.0 mg, 54.6 μmol, 1.0 eq.) in benzene (1.0 ml) was stirred at room temperature for 40 minutes. The volatiles were removed under reduced pressure from the green suspension. The product was extracted with benzene (0.5 ml), the volatiles were removed under reduced pressure and the solid is coevaporated with frozen benzene (1 ml). The product was crystallized from a concentrated toluene solution at -40 °C to yield Ar\*Ge(AuPPh<sub>3</sub>)RuPPh<sub>3</sub> (13.8 mg, 10.0 μmol, 19 %) as green crystals suitable for X-ray diffraction. **<sup>1</sup>H-NMR** (400.11 MHz, C<sub>6</sub>D<sub>6</sub>, 300.00 K): δ = 0.80 (d, 6H, <sup>3</sup>J<sub>H-H</sub> = 6.7 Hz, H-24), 0.81 (d, 6H, <sup>3</sup>J<sub>H-H</sub> = 6.5 Hz, H-15), 1.26 (d, 6H, <sup>3</sup>J<sub>H-H</sub> = 6.9 Hz, H-12), 1.40 (d, 6H, <sup>3</sup>J<sub>H-H</sub> = 6.9 Hz, H-21), 1.43 (d, 6H, <sup>3</sup>J<sub>H-H</sub> = 6.9 Hz, H-13), 1.48 (d, 6H, <sup>3</sup>J<sub>H-H</sub> = 6.7 Hz, H-22), 1.57 (sept, 1H, <sup>3</sup>J<sub>H-H</sub> = 6.8 Hz, H-23), 2.03 (sept, 1H, <sup>3</sup>J<sub>H-H</sub> = 6.7 Hz, H-14), 2.83 (sept, 2H, <sup>3</sup>J<sub>H-H</sub> = 6.8 Hz, H-20), 3.36 (sept, 2H, <sup>3</sup>J<sub>H-H</sub> = 6.8 Hz, H-11), 5.19 (br. s, 2H, H-18), 6.85 (m, 3H, H-30), 6.89 (m, 6H, H-29), 6.92 (m, 6H, H-32), 6.96 (m, 6H, H-33), 6.96 (s, 2H, H-9), 7.02 (m, 3H, H-34), 7.15 (m, 1H, H-3), 7.35 (m, 1H, H-4), 8.04 (m, 6H, H-28), 8.05 (m, 1H, H-5) ppm. **<sup>13</sup>C{<sup>1</sup>H}-NMR** (100.61 MHz, C<sub>6</sub>D<sub>6</sub>, 300.00 K): δ = 23.2 (s, C-24), 23.5 (s, C-15), 23.8 (s, C-13), 24.4 (s, C-12), 24.7 (s, C-21), 27.1 (s, C-22), 30.2 (s, C-23), 30.5 (s, C-20), 30.5 (s, C-11), 33.0 (s, C-14), 73.4 (br. s, C-18), 103.0 (s, C-16), 109.7 (s, C-19), 112.9 (br. s, C-17), 120.5 (s, C-9), 124.9 (s, C-4), 126.3 (d, <sup>3</sup>J<sub>P-C</sub> = 9.0 Hz, C-29), 127.3 (s, C-5), 127.4 (m (overlapping with solvent signal), C-30), 128.2 (d, <sup>3</sup>J<sub>P-C</sub> = 10.3 Hz, C-33), 129.9 (s, C-3), 130.1 (d, <sup>4</sup>J<sub>P-C</sub> = 1.6 Hz, C-34), 131.7 (d, <sup>1</sup>J<sub>P-C</sub> = 40.5 Hz, C-31), 134.5 (d, <sup>2</sup>J<sub>P-C</sub> = 14.5 Hz, C-32), 135.0 (d, <sup>2</sup>J<sub>P-C</sub> = 12.8 Hz, C-28), 141.3 (s, C-6), 141.7 (s, C-7), 143.4 (s, C-2), 144.4 (d, <sup>1</sup>J<sub>P-C</sub> = 32.1 Hz, C-27), 145.3 (s, C-10), 145.7 (s, C-8), 181.8 (s, C-1) ppm. **<sup>31</sup>P{<sup>1</sup>H}-NMR** (161.97 MHz, C<sub>6</sub>D<sub>6</sub>, 300.00 K): δ = 46.9 (d, <sup>4</sup>J<sub>P-P</sub> = 6.3 Hz, P-31), 55.7 (d, <sup>4</sup>J<sub>P-P</sub> = 7.7 Hz, P-27) ppm. **UV-Vis** (*n*-pentane, c = 8.71 μmol · l<sup>-1</sup>): λ (nm) [ε (l · mol<sup>-1</sup> · cm<sup>-1</sup>)]: 351 [111435], 620 [14321]. EA calculated for C<sub>72</sub>H<sub>79</sub>AuGeP<sub>2</sub>Ru (%): C 62.80, H 5.78 Found: C 62.89, H 5.43.

Compound 5: Ar\*Ge(C<sub>6</sub>H<sub>4</sub>F)RuPPh<sub>3</sub>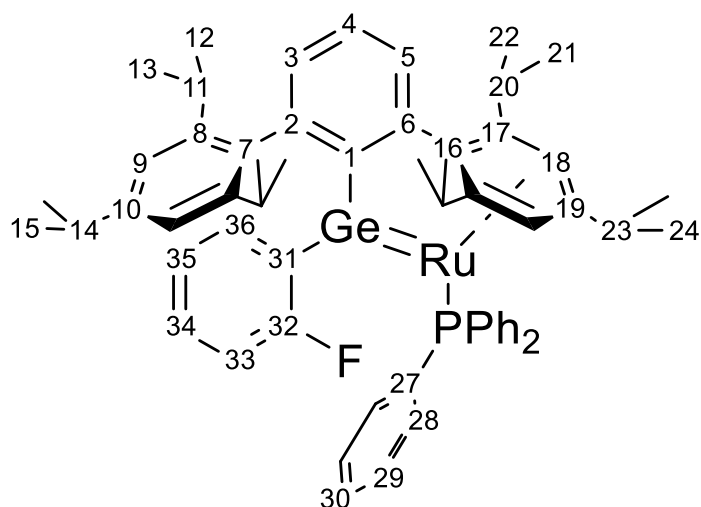

To a mixture of Ar\*GeKRuPPh<sub>3</sub> (50.0 mg, 52.3 μmol, 1.0 eq.) and 18-c-6 (13.8 mg, 52.3 μmol, 1.0 eq.) in benzene (0.5 ml) *o*-difluorobenzene (0.50 ml, 579 mg, 5.07 mmol, 97.1 eq.) was added at room temperature. After stirring the reaction mixture for 60 minutes the volatiles were removed under reduced pressure from the green suspension. The product was extracted with benzene (0.5 ml), the volatiles were removed under reduced pressure and the solid was coevaporated with frozen benzene (1 ml). The product was crystallized from a concentrated diethylether solution at -40 °C to yield Ar\*Ge(C<sub>6</sub>H<sub>4</sub>F)RuPPh<sub>3</sub> (44.1 mg, 43.5 μmol, 83 %) as green crystals suitable for X-ray diffraction. **<sup>1</sup>H-NMR** (400.11 MHz, C<sub>6</sub>D<sub>6</sub>, 300.00 K): δ = 0.77 (d, 6H, <sup>3</sup>J<sub>H-H</sub> = 6.8 Hz, H-24), 1.05 (d, 6H, <sup>3</sup>J<sub>H-H</sub> = 6.8 Hz, H-12), 1.15 (d, 6H, <sup>3</sup>J<sub>H-H</sub> = 6.9 Hz, H-15), 1.28 (d, 6H, <sup>3</sup>J<sub>H-H</sub> = 6.8 Hz, H-13), 1.36 (d, 6H, <sup>3</sup>J<sub>H-H</sub> = 6.8 Hz, H-21), 1.44 (d, 6H, <sup>3</sup>J<sub>H-H</sub> = 6.9 Hz, H-22), 1.66 (sept, 1H, <sup>3</sup>J<sub>H-H</sub> = 6.8 Hz, H-23), 2.65 (sept, 1H, <sup>3</sup>J<sub>H-H</sub> = 6.8 Hz, H-14), 2.67 (br. m, 2H, H-20), 2.98 (sept, 2H, <sup>3</sup>J<sub>H-H</sub> = 6.7 Hz, H-11), 5.33 (br. s, 2H, H-18), 6.14 (m, 1H, H-36), 6.20 (m, 1H, H-35), 6.20 (m, 1H, H-33), 6.51 (m, 1H, H-34), 6.76 (s, 2H, H-9), 6.93 (m, 3H, H-30), 6.96 (m, 6H, H-29), 7.20 (m, 1H, H-3), 7.26 (m, 1H, H-4), 7.69 (m, 6H, H-28), 7.90 (m, 1H, H-5) ppm. **<sup>13</sup>C{<sup>1</sup>H}-NMR** (100.61 MHz, C<sub>6</sub>D<sub>6</sub>, 300.00 K): δ = 22.4 (s, C-13), 22.8 (s, C-24), 23.9 (s, C-15), 24.2 (s, C-22), 25.9 (s, C-12), 26.7 (s, C-21), 30.3 (s, C-20), 30.3 (s, C-11), 30.5 (s, C-23), 34.2 (s, C-14), 73.9 (br. s, C-18), 100.7 (d, *J*<sub>P-C</sub> = 10.6 Hz, C-16), 109.9 (s, C-19), 113.8 (d, <sup>2</sup>*J*<sub>F-C</sub> = 26.1 Hz, C-33), 114.9 (d, *J*<sub>P-C</sub> = 4.0 Hz, C-17), 119.9 (s, C-9), 122.5 (d, <sup>4</sup>*J*<sub>F-C</sub> = 1.8 Hz, C-35), 125.4 (s, C-4), 126.6 (d, <sup>3</sup>*J*<sub>P-C</sub> = 10.1 Hz, C-29), 127.1 (s, C-5), 127.7 (m (overlapping with solvent signal), C-34), 127.8 (m (overlapping with solvent signal), C-30), 130.9 (s, C-3), 132.9 (d, <sup>3</sup>*J*<sub>F-C</sub> = 9.6 Hz, C-36), 134.1 (d, <sup>2</sup>*J*<sub>P-C</sub> = 12.9 Hz, C-28), 137.0 (d, <sup>2</sup>*J*<sub>F-C</sub> = 36.5 Hz, C-31), 138.1 (s, C-7), 140.8 (s, C-6), 141.9 (s, C-2), 142.2 (d, <sup>1</sup>*J*<sub>P-C</sub> = 36.2 Hz, C-27), 145.4 (s, C-8), 146.7 (s, C-10), 160.5 (d, <sup>1</sup>*J*<sub>F-C</sub> = 234.7 Hz, C-32), 172.2 (s, C-1) ppm. **<sup>19</sup>F{<sup>1</sup>H}-NMR** (376.48 MHz, C<sub>6</sub>D<sub>6</sub>, 300.00 K): δ = -97.0 (d, <sup>5</sup>*J*<sub>P-F</sub> = 2.5 Hz) ppm. **<sup>31</sup>P{<sup>1</sup>H}-NMR** (161.97 MHz, C<sub>6</sub>D<sub>6</sub>, 300.00 K): δ = 54.9 (d, <sup>5</sup>*J*<sub>P-F</sub> = 2.5 Hz) ppm. **UV-Vis** (n-pentane, c = 11.8 μmol · l<sup>-1</sup>): λ (nm) [ε (l · mol<sup>-1</sup> · cm<sup>-1</sup>)]: 378 [54559], 620 [17742]. **Elemental analysis** calculated for C<sub>60</sub>H<sub>68</sub>FGePRu (%): C 71.15, H 6.77 Found: C 70.07, H 6.67.

Compound **6**: Ar\*Ge(C<sub>6</sub>F<sub>5</sub>)RuPPh<sub>3</sub>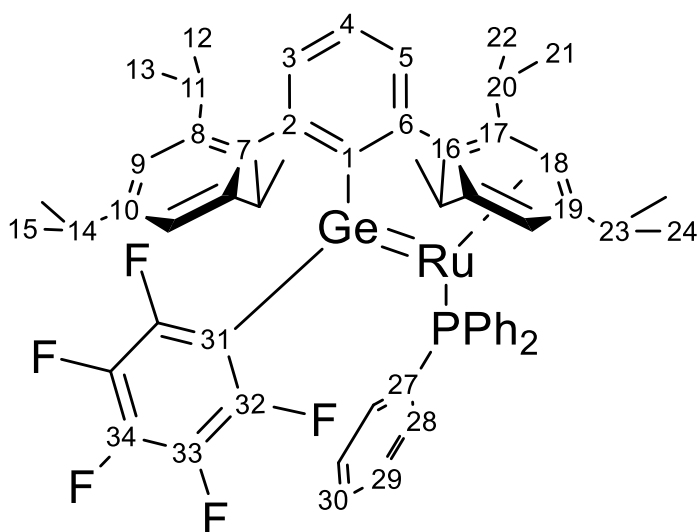

To a mixture of Ar\*GeKRuPPh<sub>3</sub> (102 mg, 106 μmol, 1.0 eq.) and hexafluorobenzene (20.0 mg, 106 μmol, 1.0 eq.) benzene (1.0 ml) was added at room temperature. After stirring the reaction mixture for 5 minutes the volatiles were removed under reduced pressure from the green suspension. The product was extracted with benzene (0.5 ml), the volatiles were removed under reduced pressure and the solid was coevaporated with frozen benzene (1 ml). The product Ar\*Ge(C<sub>6</sub>F<sub>5</sub>)RuPPh<sub>3</sub> (110 mg, 101 μmol, 95 %) was obtained as green solid and crystals suitable for X-ray diffraction were obtained from a mixture of toluene and hexane. **<sup>1</sup>H-NMR** (300.13 MHz, C<sub>6</sub>D<sub>6</sub>, 300.00 K): δ = 0.71 (d, 6H, <sup>3</sup>J<sub>H-H</sub> = 6.7 Hz, H-24), 1.01 (d, 6H, <sup>3</sup>J<sub>H-H</sub> = 6.8 Hz, H-12), 1.22 (d, 6H, <sup>3</sup>J<sub>H-H</sub> = 6.9 Hz, H-15), 1.31 (d, 6H, <sup>3</sup>J<sub>H-H</sub> = 6.7 Hz, H-21), 1.32 (d, 6H, <sup>3</sup>J<sub>H-H</sub> = 6.5 Hz, H-13), 1.43 (d, 6H, <sup>3</sup>J<sub>H-H</sub> = 6.7 Hz, H-22), 1.61 (sept, 1H, <sup>3</sup>J<sub>H-H</sub> = 6.6 Hz, H-23), 2.62 (sept, 2H, <sup>3</sup>J<sub>H-H</sub> = 6.8 Hz, H-20), 2.90 (sept, 2H, H-11), 2.75 (sept, 1H, <sup>3</sup>J<sub>H-H</sub> = 6.9 Hz, H-14), 5.22 (br. s, 2H, H-18), 6.90 (s, 2H, H-9), 6.90 (m, 3H, H-30), 6.93 (m, 6H, H-29), 7.22 (m, 1H, H-3), 7.23 (m, 1H, H-4), 7.66 (m, 6H, H-28), 7.83 (m, 1H, H-5) ppm. **<sup>13</sup>C{<sup>1</sup>H}-NMR** (75.47 MHz, C<sub>6</sub>D<sub>6</sub>, 300.00 K): δ = 21.8 (d, J = 4.9 Hz, C-13), 22.8 (s, C-24), 23.6 (s, C-15), 24.3 (s, C-22), 26.2 (s, C-12), 26.5 (s, C-21), 30.2 (s, C-20), 30.4 (s, C-23), 30.5 (s, C-11), 34.0 (s, C-14), 74.2 (br. s, C-18), 99.9 (d, J<sub>P-C</sub> = 10.2 Hz, C-16), 110.0 (s, C-19), 116.0 (d, J<sub>P-C</sub> = 3.8 Hz, C-17), 119.7 (s, C-9), 120.1 (s, C-31), 125.7 (s, C-4), 126.7 (d, <sup>3</sup>J<sub>P-C</sub> = 9.3 Hz, C-29), 127.1 (s, C-5), 128.2 (m (overlapping with solvent signal), C-30), 131.6 (s, C-3), 134.0 (d, <sup>2</sup>J<sub>P-C</sub> = 12.7 Hz, C-28), 136.3 (d, <sup>1</sup>J<sub>F-C</sub> = 247.1 Hz, C-33), 137.9 (s, C-7), 140.2 (d, <sup>1</sup>J<sub>F-C</sub> = 247.2 Hz, C-34), 140.7 (s, C-2), 141.1 (d, <sup>1</sup>J<sub>P-C</sub> = 37.2 Hz, C-27), 141.4 (s, C-6), 142.7 (d, <sup>1</sup>J<sub>F-C</sub> = 234.1 Hz, C-32), 145.8 (d, C-8), 147.6 (s, C-10), 171.7 (s, C-1) ppm. **<sup>19</sup>F{<sup>1</sup>H}-NMR** (282.40 MHz, C<sub>6</sub>D<sub>6</sub>, 300.00 K): δ = -162.5 (m, F-33), -156.8 (t, <sup>3</sup>J<sub>F-F</sub> = 20.6 Hz, F-34), -123.3 (m, F-32) ppm. **<sup>31</sup>P{<sup>1</sup>H}-NMR** (121.49 MHz, C<sub>6</sub>D<sub>6</sub>, 300.00 K): δ = 51.7 (t, <sup>5</sup>J<sub>F-P</sub> = 3.7 Hz) ppm. **UV-Vis** (*n*-pentane, c = 11.1 μmol · l<sup>-1</sup>): λ (nm) [ε (l · mol<sup>-1</sup> · cm<sup>-1</sup>)]: 364 [69030], 618 [20855]. **Elemental analysis** calculated for C<sub>60</sub>H<sub>64</sub>F<sub>5</sub>GePRu (%): C 66.43, H 5.95 Found: C 66.48, H 5.66.

Compound 7: Ar\*Ge(C<sub>6</sub>H<sub>5</sub>)RuPPh<sub>3</sub>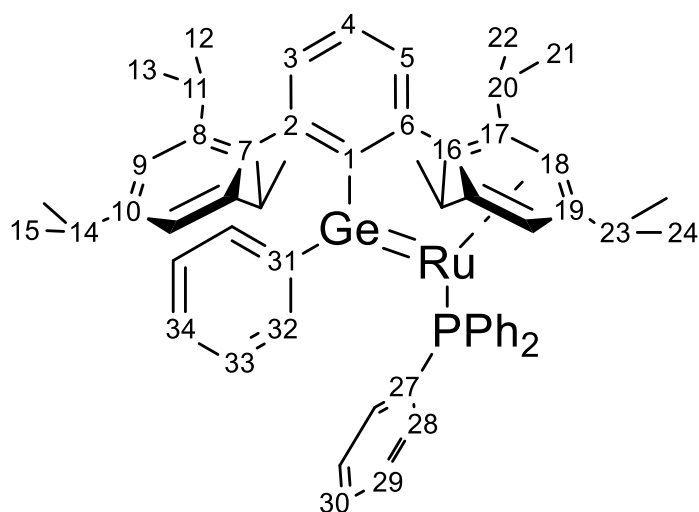

To a mixture of Ar\*GeKRuPPh<sub>3</sub> (21.1 mg, 22.1 μmol, 1.0 eq.), 18-c-6 (10.5 mg, 39.7 μmol, 1.8 eq.), and fluorobenzene (0.05 ml, 529 μmol, 24.0 eq.) and benzene (0.5 ml) was added at room temperature. After stirring the reaction mixture for 3 days the volatiles were removed under reduced pressure from the green suspension. The product was extracted with benzene (0.5 ml), the volatiles were removed under reduced pressure and the solid was coevaporated with frozen benzene (1 ml). The product Ar\*Ge(C<sub>6</sub>H<sub>5</sub>)RuPPh<sub>3</sub> (20.2 mg, 22.1 μmol, 92 %) was obtained as green solid. **Characterization:** <sup>1</sup>H-NMR (600.13 MHz, C<sub>6</sub>D<sub>6</sub>, 300.00 K): δ = 0.83 (d, 6H, <sup>3</sup>J<sub>H-H</sub> = 6.8 Hz, H-24), 1.09 (d, 6H, <sup>3</sup>J<sub>H-H</sub> = 6.2 Hz, H-12), 1.10 (d, 6H, <sup>3</sup>J<sub>H-H</sub> = 6.4 Hz, H-13), 1.26 (d, 6H, <sup>3</sup>J<sub>H-H</sub> = 6.9 Hz, H-15), 1.39 (d, 6H, <sup>3</sup>J<sub>H-H</sub> = 6.7 Hz, H-21), 1.46 (m, 1H, H-23), 1.47 (d, 1H, <sup>3</sup>J<sub>H-H</sub> = 6.9 Hz, H-22), 2.66 (sept, 2H, <sup>3</sup>J<sub>H-H</sub> = 6.7 Hz, H-20), 2.78 (sept, 1H, <sup>3</sup>J<sub>H-H</sub> = 6.9 Hz, H-14), 2.95 (sept, 2H, <sup>3</sup>J<sub>H-H</sub> = 6.8 Hz, H-11), 5.31 (br. s, 2H, H-18), 6.44 (m, 2H, H-32), 6.57 (m, 2H, H-33), 6.68 (m, 1H, H-34), 6.89 (s, 2H, H-9), 6.95 (m, 3H, H-30), 6.98 (m, 6H, H-29), 7.12 (m, 1H, H-3), 7.25 (m, 1H, H-4), 7.73 (m, 6H, H-28), 7.90 (m, 1H, H-5) ppm. <sup>13</sup>C{<sup>1</sup>H}-NMR (150.90 MHz, C<sub>6</sub>D<sub>6</sub>, 300.00 K): δ = 22.8 (s, C-13), 23.1 (s, C-24), 24.1 (s, C-15), 24.7 (s, C-22), 25.2 (s, C-12), 26.7 (s, C-21), 30.3 (s, C-23), 30.4 (s, C-20), 30.4 (s, C-11), 34.3 (s, C-14), 74.3 (br. s, C-18), 100.3 (d, J<sub>P-C</sub> = 10.3 Hz, C-16), 109.9 (s, C-19), 114.6 (d, J<sub>P-C</sub> = 3.6 Hz, C-20), 120.3 (s, C-9), 125.4 (s, C-34), 125.5 (s, C-4), 126.3 (s, C-33), 126.6 (d, <sup>3</sup>J<sub>P-C</sub> = 9.0 Hz, C-29), 127.0 (s, C-5), 127.9 (m (overlapping with solvent signal), C-30), 130.5 (s, C-3), 130.9 (s, C-32), 134.3 (d, <sup>3</sup>J<sub>P-C</sub> = 12.7 Hz, C-28), 139.1 (s, C-7), 140.8 (s, C-2), 142.0 (d, <sup>2</sup>J<sub>P-C</sub> = 35.7 Hz, C-27), 142.2 (s, C-6), 145.6 (s, C-8), 147.3 (s, C-10), 152.6 (s, C-31), 172.7 (s, C-1) ppm. <sup>31</sup>P{<sup>1</sup>H}-NMR (161.97 MHz, C<sub>6</sub>D<sub>6</sub>, 300.00 K): δ = 54.9 (s) ppm.

# Data of crystal structure determinations

**Table S11.** Crystal structure refinement tables of **2**, **3a**, **3b**, **4**, **5** and **6**.

|                                              | <b>2</b>                                                                        | <b>3a</b>                                                                     | <b>3b</b>                                               | <b>4</b>                                                                                     | <b>5</b>                                     | <b>6</b>                                             |
|----------------------------------------------|---------------------------------------------------------------------------------|-------------------------------------------------------------------------------|---------------------------------------------------------|----------------------------------------------------------------------------------------------|----------------------------------------------|------------------------------------------------------|
| Empirical formula                            | C <sub>54</sub> H <sub>64</sub> ClGePRu · 2<br>(C <sub>6</sub> H <sub>6</sub> ) | 2 (C <sub>54</sub> H <sub>64</sub> GeKPRu) ·<br>C <sub>7</sub> H <sub>8</sub> | C <sub>78</sub> H <sub>112</sub> GeKO <sub>12</sub> PRu | 2 (C <sub>72</sub> H <sub>79</sub> AuGeP <sub>2</sub> Ru) ·<br>C <sub>7</sub> H <sub>8</sub> | C <sub>60</sub> H <sub>68</sub> FGePRu       | C <sub>60</sub> H <sub>64</sub> F <sub>5</sub> GePRu |
| M <sub>r</sub> / g mol <sup>-1</sup>         | 1109.34                                                                         | 2005.69                                                                       | 1485.40                                                 | 2845.96                                                                                      | 1012.77                                      | 1084.74                                              |
| l / Å                                        | 0.71073                                                                         | 0.71073                                                                       | 0.71073                                                 | 0.71073                                                                                      | 0.71073                                      | 0.71073                                              |
| T / K                                        | 100(2)                                                                          | 120(2)                                                                        | 100(2)                                                  | 100(2)                                                                                       | 100(2)                                       | 100(2)                                               |
| Crystal system                               | triclinic                                                                       | triklin                                                                       | monoclinic                                              | triclinic                                                                                    | monoclinic                                   | triclinic                                            |
| Space group                                  | <i>P</i> $\bar{1}$                                                              | <i>P</i> $\bar{1}$                                                            | Cc                                                      | <i>P</i> $\bar{1}$                                                                           | <i>Pn</i>                                    | <i>P</i> $\bar{1}$                                   |
| Z                                            | 2                                                                               | 1                                                                             | 4                                                       | 1                                                                                            | 2                                            | 2                                                    |
| a / Å                                        | 12.4809(4)                                                                      | 13.1931(8)                                                                    | 18.1537(5)                                              | 12.5095(3)                                                                                   | 13.0284(3)                                   | 12.9143(3)                                           |
| b / Å                                        | 14.0176(5)                                                                      | 13.6074(8)                                                                    | 18.4660(4)                                              | 13.2731(4)                                                                                   | 12.3512(3)                                   | 14.1030(4)                                           |
| c / Å                                        | 17.7133(7)                                                                      | 15.3277(10)                                                                   | 23.0398(6)                                              | 21.4516(8)                                                                                   | 17.2539(4)                                   | 16.5775(4)                                           |
| a / °                                        | 91.403(2)                                                                       | 87.493(2)                                                                     | 90                                                      | 89.463(2)                                                                                    | 90                                           | 67.9240(10)                                          |
| b / °                                        | 90.159(2)                                                                       | 77.894(2)                                                                     | 95.8450(10)                                             | 82.266(2)                                                                                    | 111.9910(10)                                 | 75.6280(10)                                          |
| g / °                                        | 113.144(2)                                                                      | 85.863(2)                                                                     | 90                                                      | 65.4790(10)                                                                                  | 90                                           | 68.5030(10)                                          |
| V / Å <sup>3</sup>                           | 2848.46(18)                                                                     | 2682.3(3)                                                                     | 7683.4(3)                                               | 3206.83(17)                                                                                  | 2574.43(11)                                  | 2581.82(12)                                          |
| D <sub>c</sub> / g cm <sup>-3</sup>          | 1.293                                                                           | 1.242                                                                         | 1.284                                                   | 1.474                                                                                        | 1.306                                        | 1.395                                                |
| m / mm <sup>-1</sup>                         | 0.907                                                                           | 0.983                                                                         | 0.720                                                   | 3.072                                                                                        | 0.949                                        | 0.962                                                |
| F(000)                                       | 1160                                                                            | 1046                                                                          | 3144                                                    | 1442                                                                                         | 1056                                         | 1120                                                 |
| Crystal size / mm                            | 0.30 x 0.28 x 0.25                                                              | 0.29 x 0.25 x 0.24                                                            | 0.299 x 0.223 x 0.184                                   | 0.385 x 0.236 x 0.180                                                                        | 0.31 x 0.29 x 0.28                           | 0.28 x 0.26 x 0.22                                   |
| q range / °                                  | 1.580 - 28.560                                                                  | 1.501 - 27.142                                                                | 1.753 - 25.348                                          | 1.689 - 26.449                                                                               | 1.649 - 30.519                               | 1.337 - 30.550                                       |
| Limiting indices                             | -16 ≤ h ≤ 16<br>-18 ≤ k ≤ 18<br>-23 ≤ l ≤ 23                                    | -16 ≤ h ≤ 16<br>-17 ≤ k ≤ 17<br>-18 ≤ l ≤ 19                                  | -21 ≤ h ≤ 21<br>-22 ≤ k ≤ 22<br>-27 ≤ l ≤ 27            | -15 ≤ h ≤ 15<br>-15 ≤ k ≤ 16<br>-26 ≤ l ≤ 26                                                 | -18 ≤ h ≤ 18<br>-17 ≤ k ≤ 17<br>-24 ≤ l ≤ 24 | -18 ≤ h ≤ 18<br>-20 ≤ k ≤ 20<br>-23 ≤ l ≤ 23         |
| Reflects. collect.                           | 159303                                                                          | 52111                                                                         | 113396                                                  | 39031                                                                                        | 95127                                        | 127602                                               |
| Indepdnt Reflects                            | 14309                                                                           | 11540                                                                         | 13931                                                   | 13145                                                                                        | 15122                                        | 15724                                                |
| R <sub>int</sub>                             | 0.0225                                                                          | 0.0694                                                                        | 0.0403                                                  | 0.0377                                                                                       | 0.0248                                       | 0.0420                                               |
| Completeness                                 | 0.985                                                                           | 0.971                                                                         | 1.000                                                   | 0.993                                                                                        | 0.994                                        | 0.993                                                |
| Absorp. Corr.                                | multi-scan                                                                      | multi-scan                                                                    | multi-scan                                              | numerical                                                                                    | multi-scan                                   | multi-scan                                           |
| Trans.(min., max.)                           | 0.6942, 0.7457                                                                  | 0.5981, 0.7455                                                                | 0.7710, 0.8403                                          | 0.6680, 0.9215                                                                               | 0.7075, 0.7461                               | 0.6958, 0.7461                                       |
| Parameters/restraints                        | 643/0                                                                           | 617/193                                                                       | 836/1206                                                | 770/122                                                                                      | 571/2                                        | 625/0                                                |
| R <sub>1</sub> , wR <sub>2</sub> [I > 2s(I)] | 0.0248, 0.0610                                                                  | 0.0853, 0.1844                                                                | 0.0536, 0.1332                                          | 0.0377, 0.0713                                                                               | 0.0241, 0.0597                               | 0.0261, 0.0608                                       |
| R <sub>1</sub> , wR <sub>2</sub> (all data)  | 0.0268, 0.0626                                                                  | 0.1250, 0.1981                                                                | 0.0563, 0.1353                                          | 0.0563, 0.0767                                                                               | 0.0252, 0.0605                               | 0.0344, 0.0640                                       |
| Goof on F <sup>2</sup>                       | 1.025                                                                           | 1.131                                                                         | 1.035                                                   | 1.057                                                                                        | 1.026                                        | 1.025                                                |
| Dr <sub>max,min</sub> / e · Å <sup>-3</sup>  | 1.879, -0.619                                                                   | 1.183, -1.662                                                                 | 1.204, -1.445                                           | 2.303, -1.352                                                                                | 0.904, -0.812                                | 0.973, -0.382                                        |
| Flack parameter                              | -                                                                               | -                                                                             | 0.016(16)                                               | -                                                                                            | 0.0049(15)                                   | -                                                    |
| CCDC                                         | 2512268                                                                         | 2512263                                                                       | 2512267                                                 | 2512264                                                                                      | 2512265                                      | 2512266                                              |

# NMR spectroscopy

## NMR spectra of compound **2**.

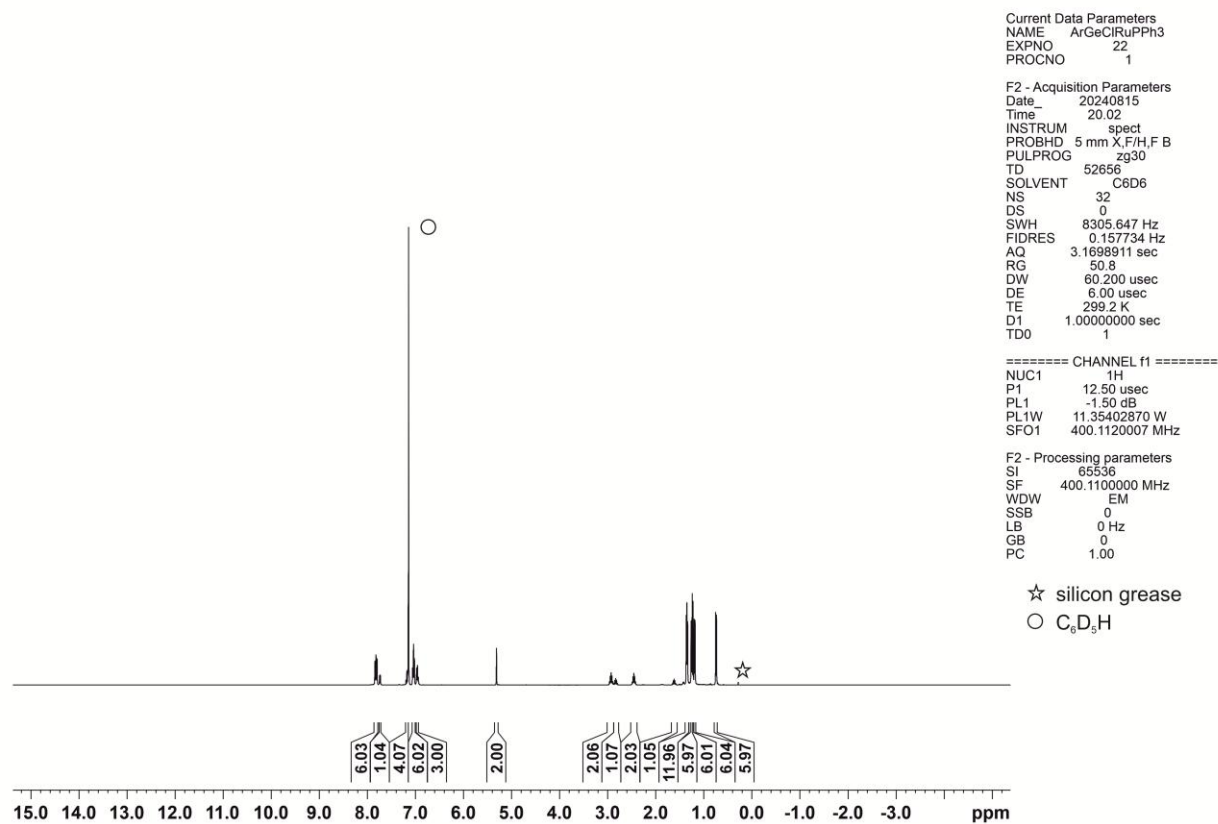

NMR Figure S11. <sup>1</sup>H NMR spectrum (-5 – 15 ppm) of compound **2**.

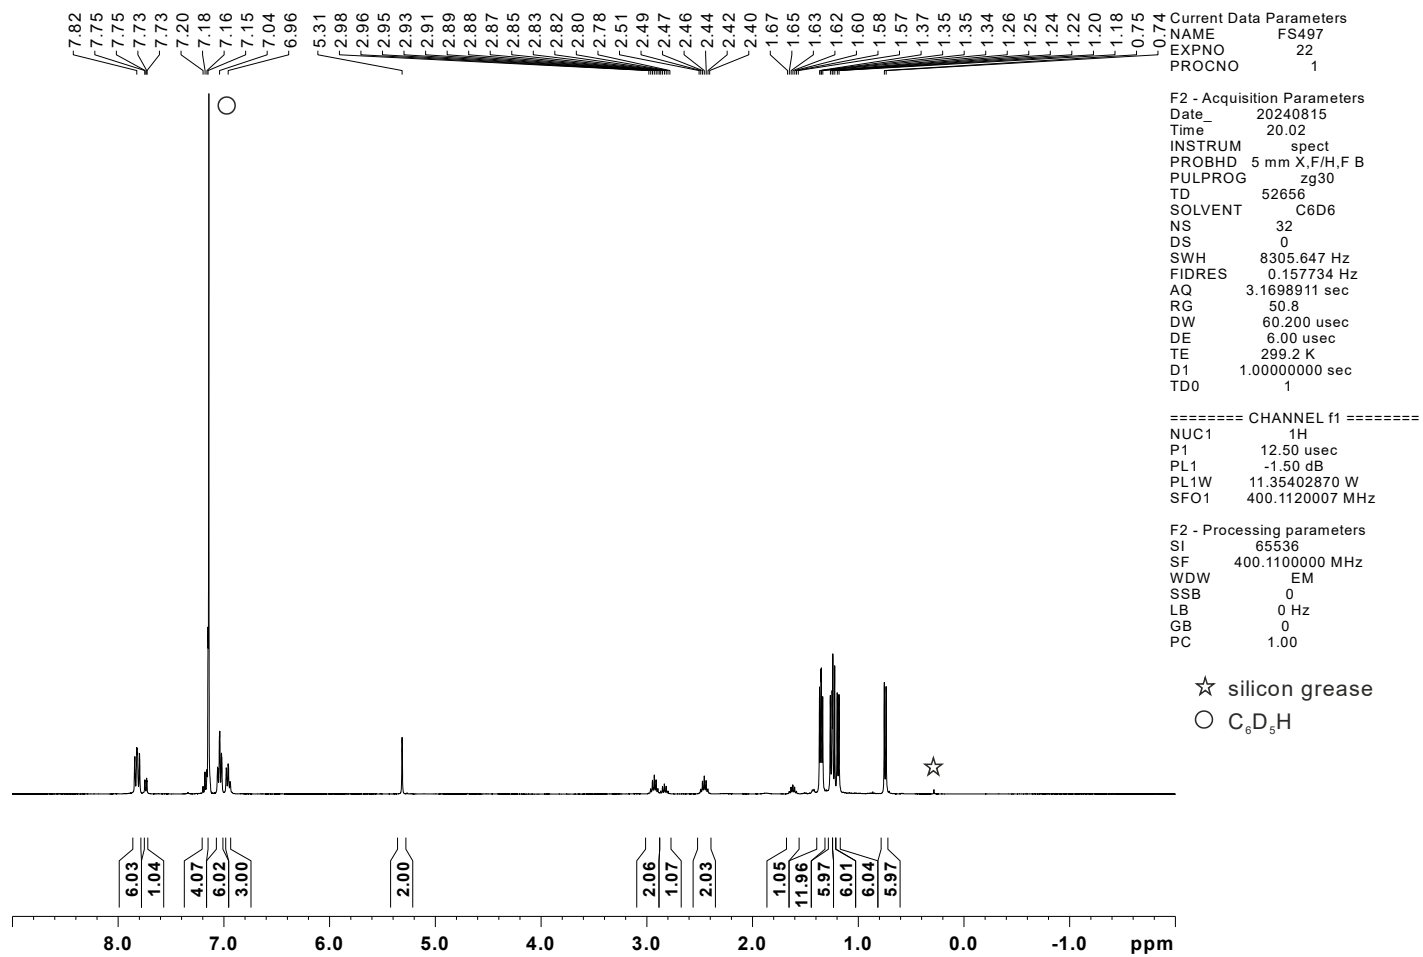Figure S12. <sup>1</sup>H NMR spectrum of compound 2.

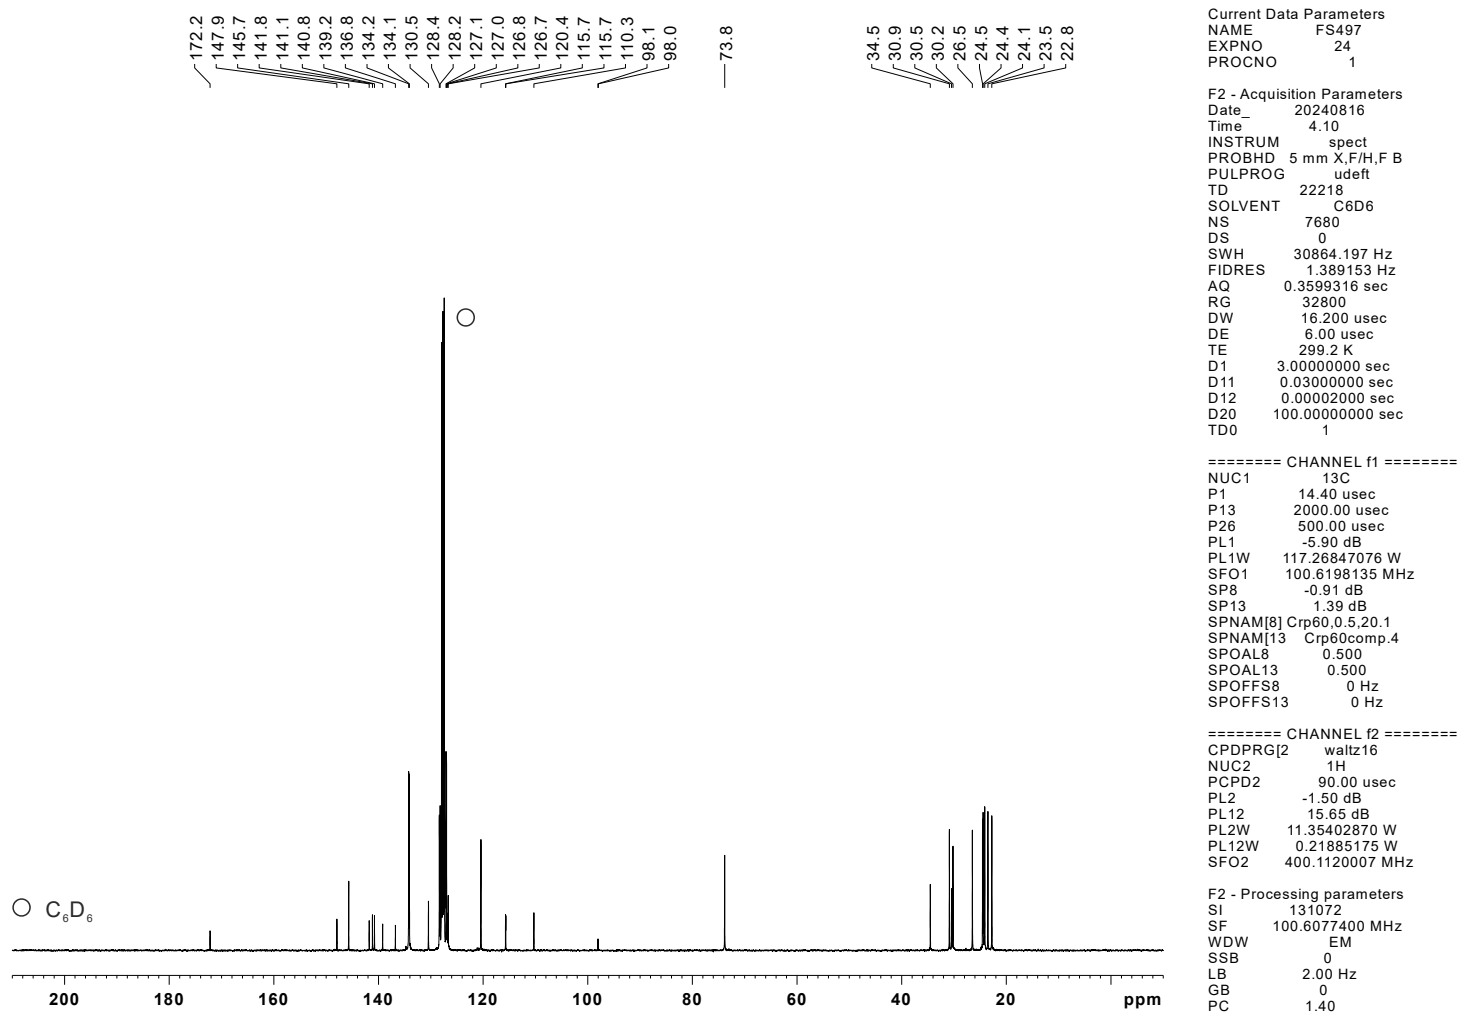Figure S13.  $^{13}\text{C}\{^1\text{H}\}$  NMR spectrum of compound **2**.

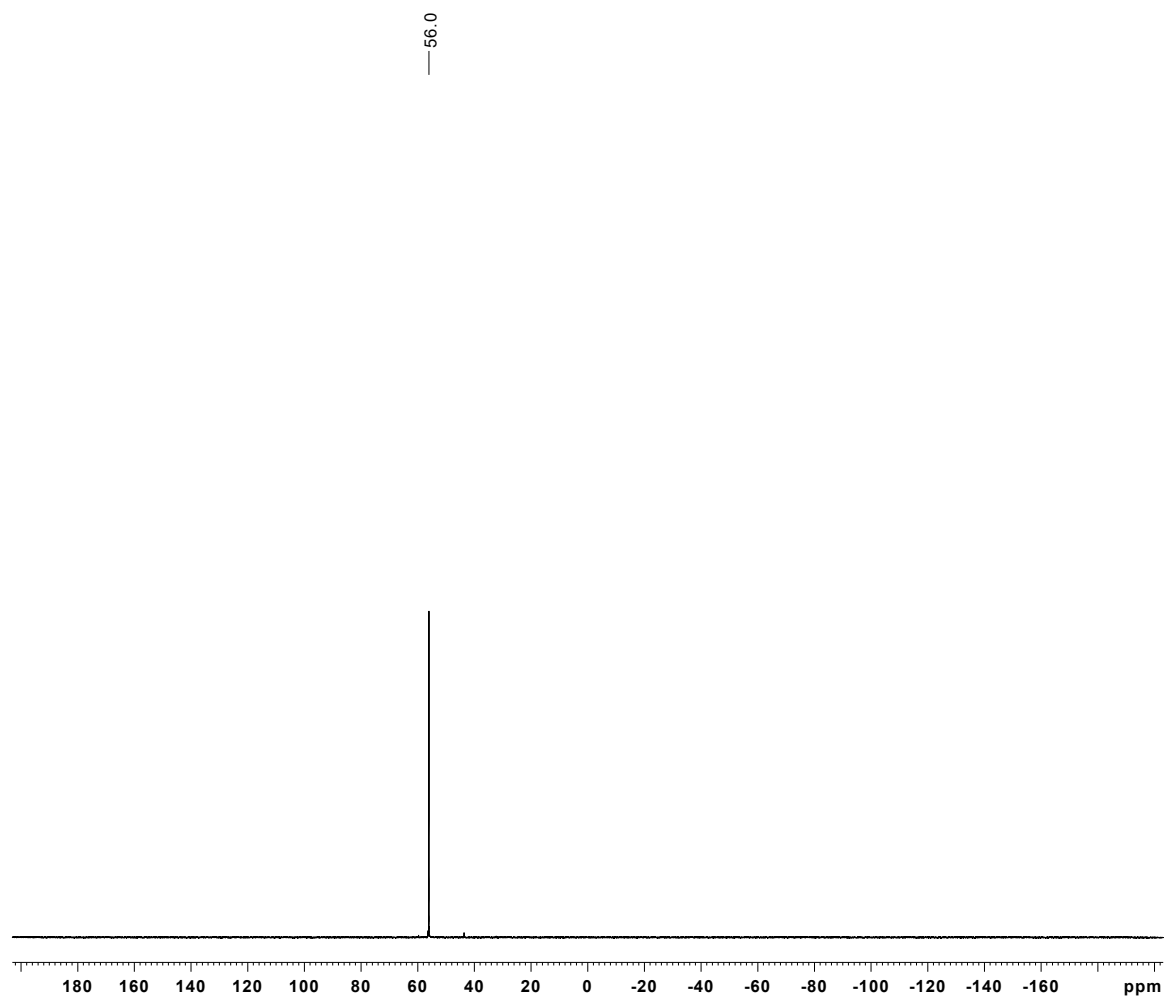

Current Data Parameters  
NAME FS497  
EXPNO 23  
PROCNO 1

F2 - Acquisition Parameters  
Date\_ 20240815  
Time 20.10  
INSTRUM spect  
PROBHD 5 mm X,F/H,F B  
PULPROG zgig30b  
TD 88150  
SOLVENT C6D6  
NS 256  
DS 0  
SWH 65789.477 Hz  
FIDRES 0.746336 Hz  
AQ 0.6699400 sec  
RG 23100  
DW 7.600 usec  
DE 6.00 usec  
TE 299.2 K  
D1 1.00000000 sec  
D11 0.03000000 sec  
TD0 1

==== CHANNEL f1 =====  
NUC1 31P  
P1 14.50 usec  
PL1 -4.00 dB  
PL1W 56.78615952 W  
SFO1 161.9674970 MHz

==== CHANNEL f2 =====  
CPDPRG2 waltz16  
NUC2 1H  
PCPD2 90.00 usec  
PL2 -1.50 dB  
PL12 15.65 dB  
PL2W 11.35402870 W  
PL12W 0.21885175 W  
SFO2 400.1120007 MHz

F2 - Processing parameters  
SI 131072  
SF 161.9674970 MHz  
WDW EM  
SSB 0  
LB 3.00 Hz  
GB 0  
PC 1.40

Figure S14.  $^{31}\text{P}\{^1\text{H}\}$  NMR spectrum of compound 2.

NMR spectra of compound **3a**.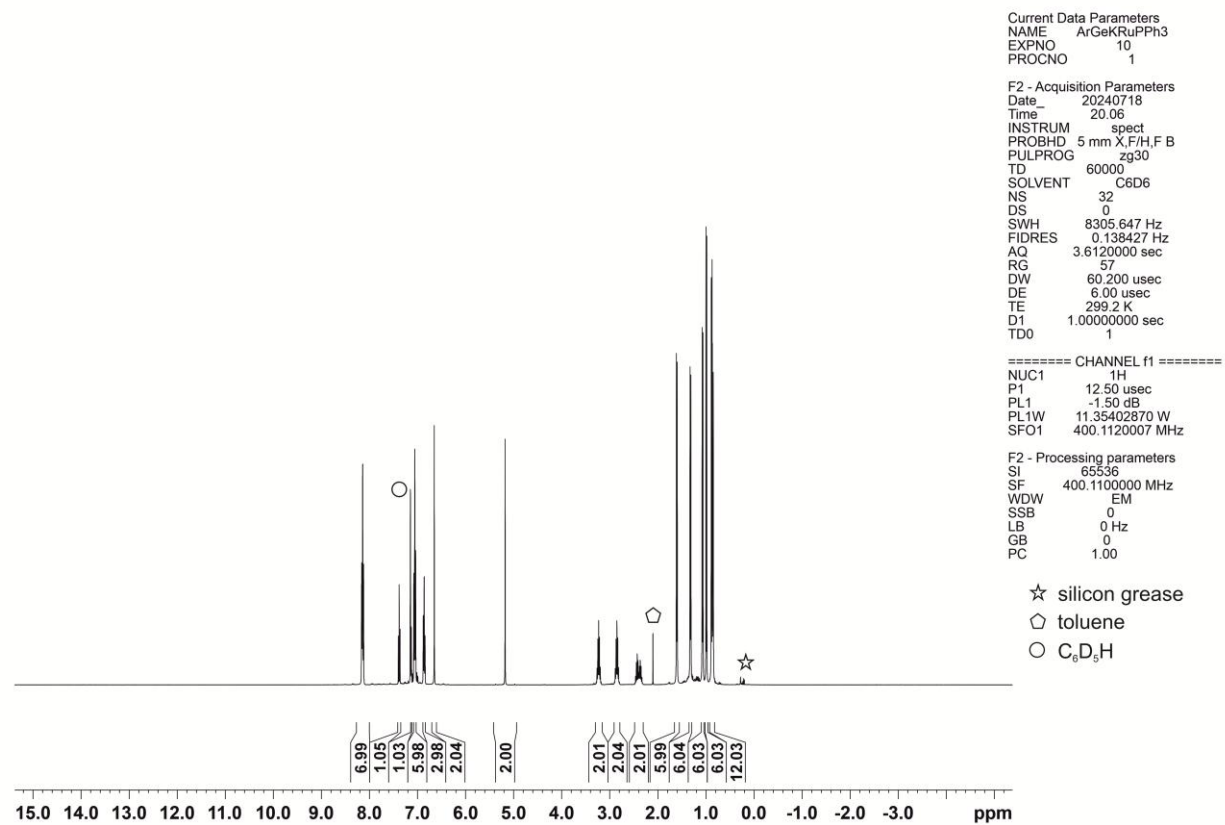Figure S15. <sup>1</sup>H NMR spectrum (-5 – 15 ppm) of compound **3a**.

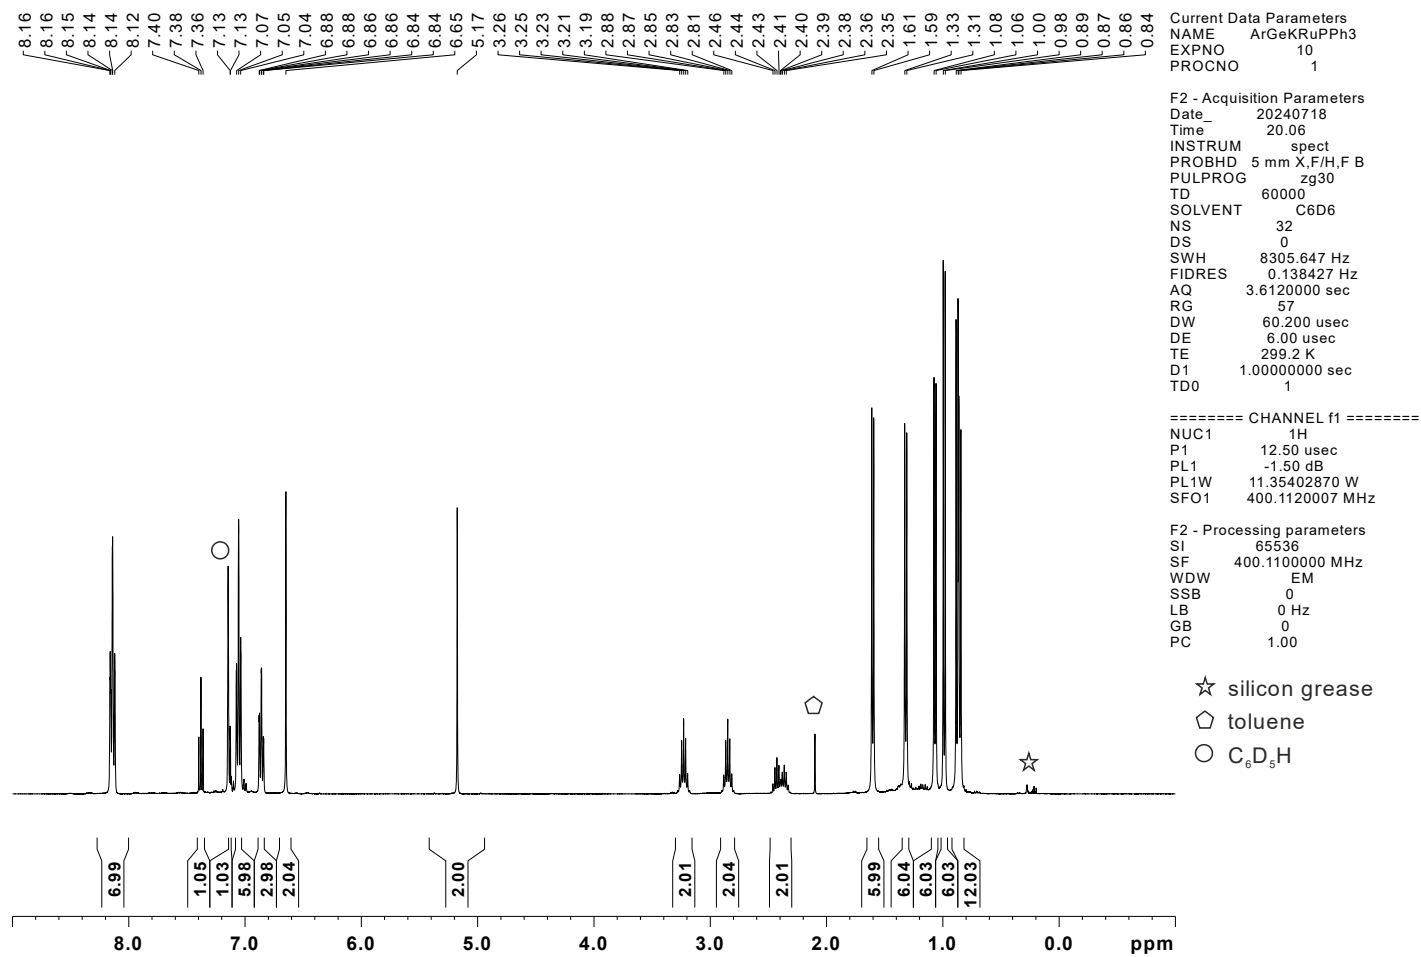Figure S16. <sup>1</sup>H NMR spectrum of compound **3a**.

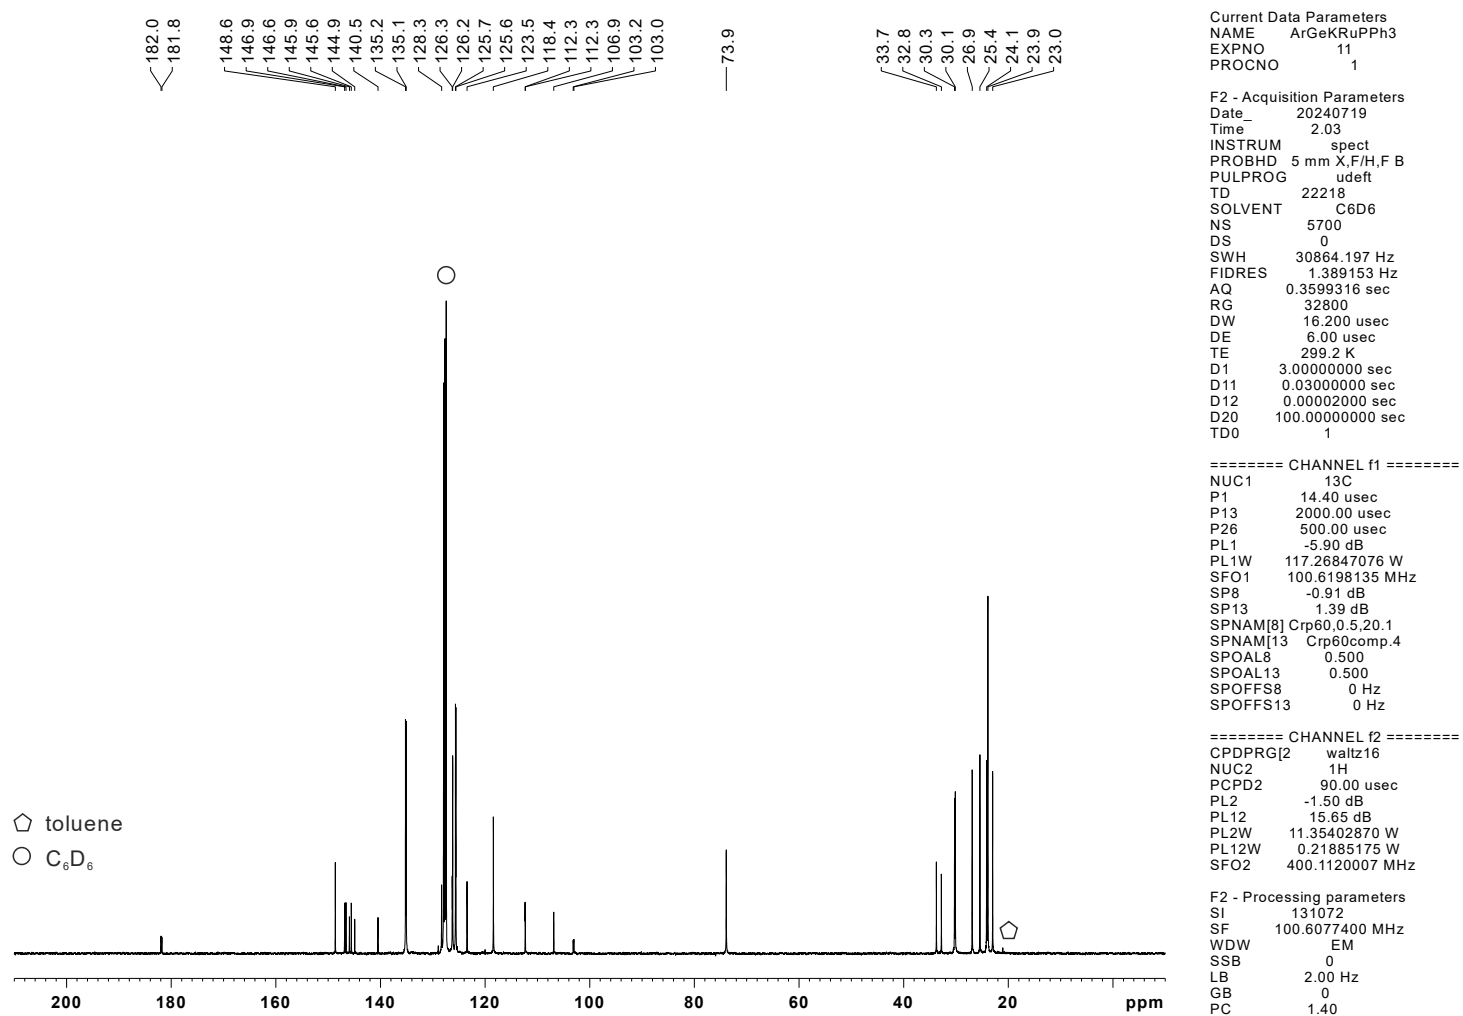Figure S17. <sup>13</sup>C{<sup>1</sup>H} NMR spectrum of compound **3a**.

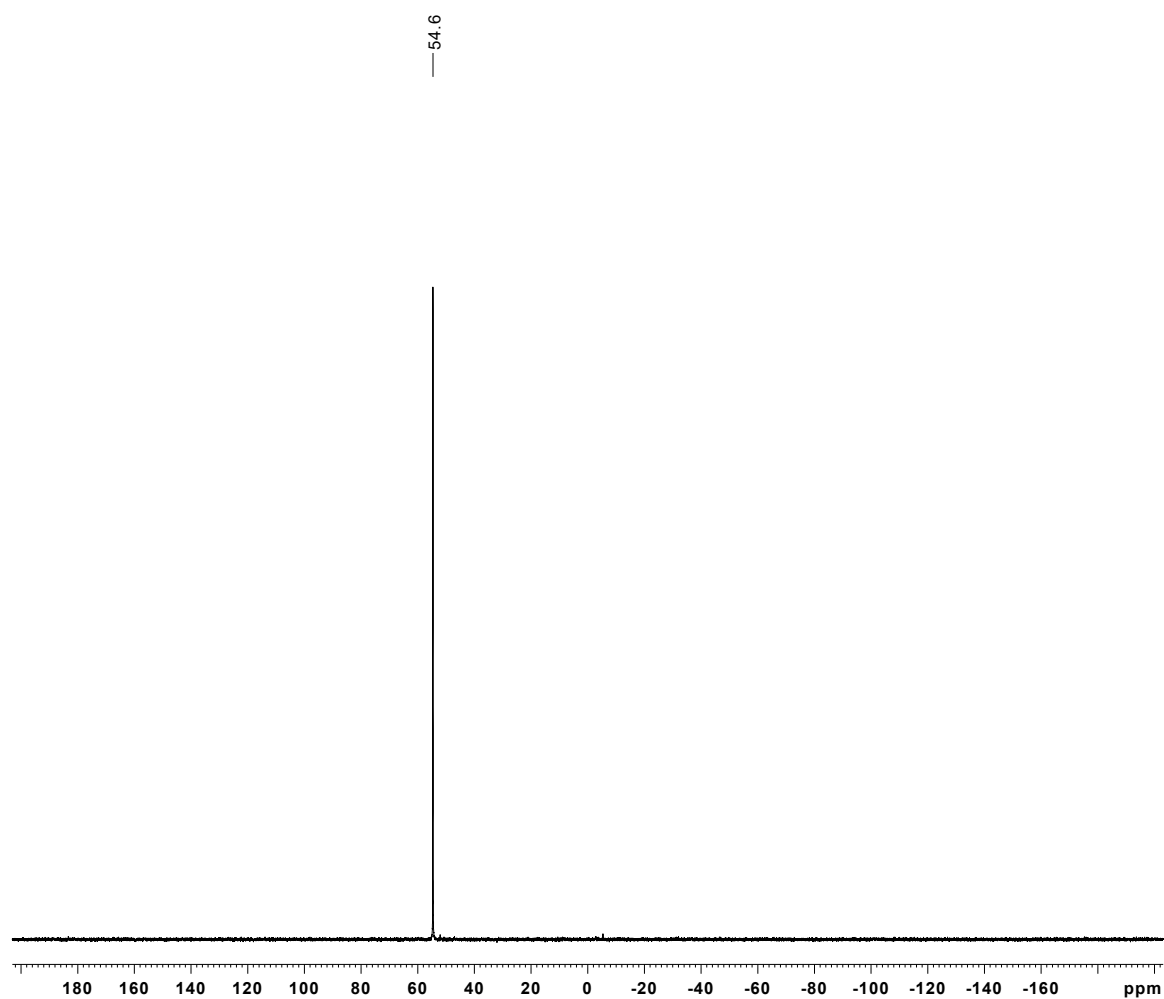

Current Data Parameters  
NAME ArGeKRuPPh3  
EXPNO 16  
PROCNO 1

F2 - Acquisition Parameters  
Date\_ 20240719  
Time 7.33  
INSTRUM spect  
PROBHD 5 mm X,F/H,F B  
PULPROG zgig30b  
TD 130000  
SOLVENT C6D6  
NS 256  
DS 0  
SWH 65789.477 Hz  
FIDRES 0.506073 Hz  
AQ 0.9880000 sec  
RG 23100  
DW 7.600 usec  
DE 6.00 usec  
TE 299.2 K  
D1 1.00000000 sec  
D11 0.03000000 sec  
TD0 1

==== CHANNEL f1 =====  
NUC1 31P  
P1 14.50 usec  
PL1 -4.00 dB  
PL1W 56.78615952 W  
SFO1 161.9674970 MHz

==== CHANNEL f2 =====  
CPDPRG2 waltz16  
NUC2 1H  
PCPD2 90.00 usec  
PL2 -1.50 dB  
PL12 15.65 dB  
PL2W 11.35402870 W  
PL12W 0.21885175 W  
SFO2 400.1120007 MHz

F2 - Processing parameters  
SI 131072  
SF 161.9674970 MHz  
WDW EM  
SSB 0  
LB 3.00 Hz  
GB 0  
PC 1.40

Figure S18.  $^{31}\text{P}\{^1\text{H}\}$  NMR spectrum of compound **3a**.

NMR spectra of compound **3b**.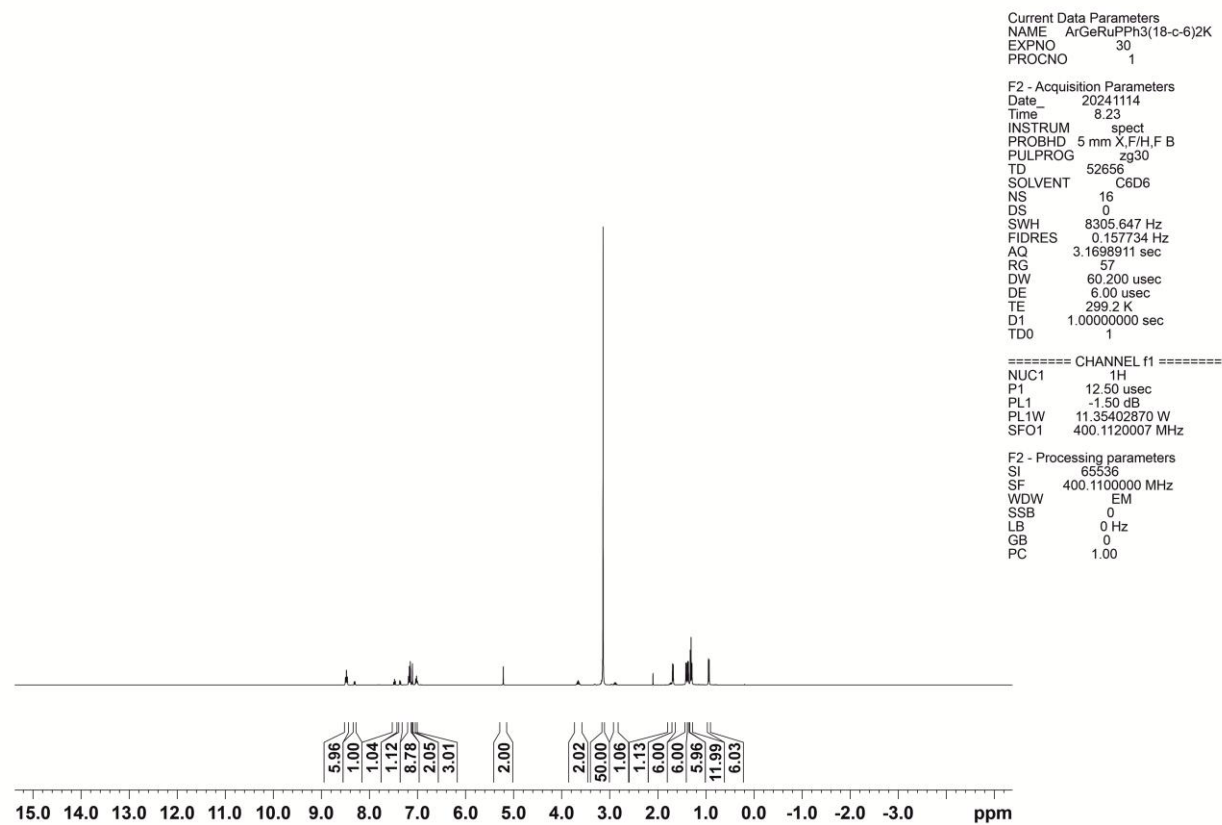Figure S19. <sup>1</sup>H NMR spectrum (–5 – 15 ppm) of compound **3b**.

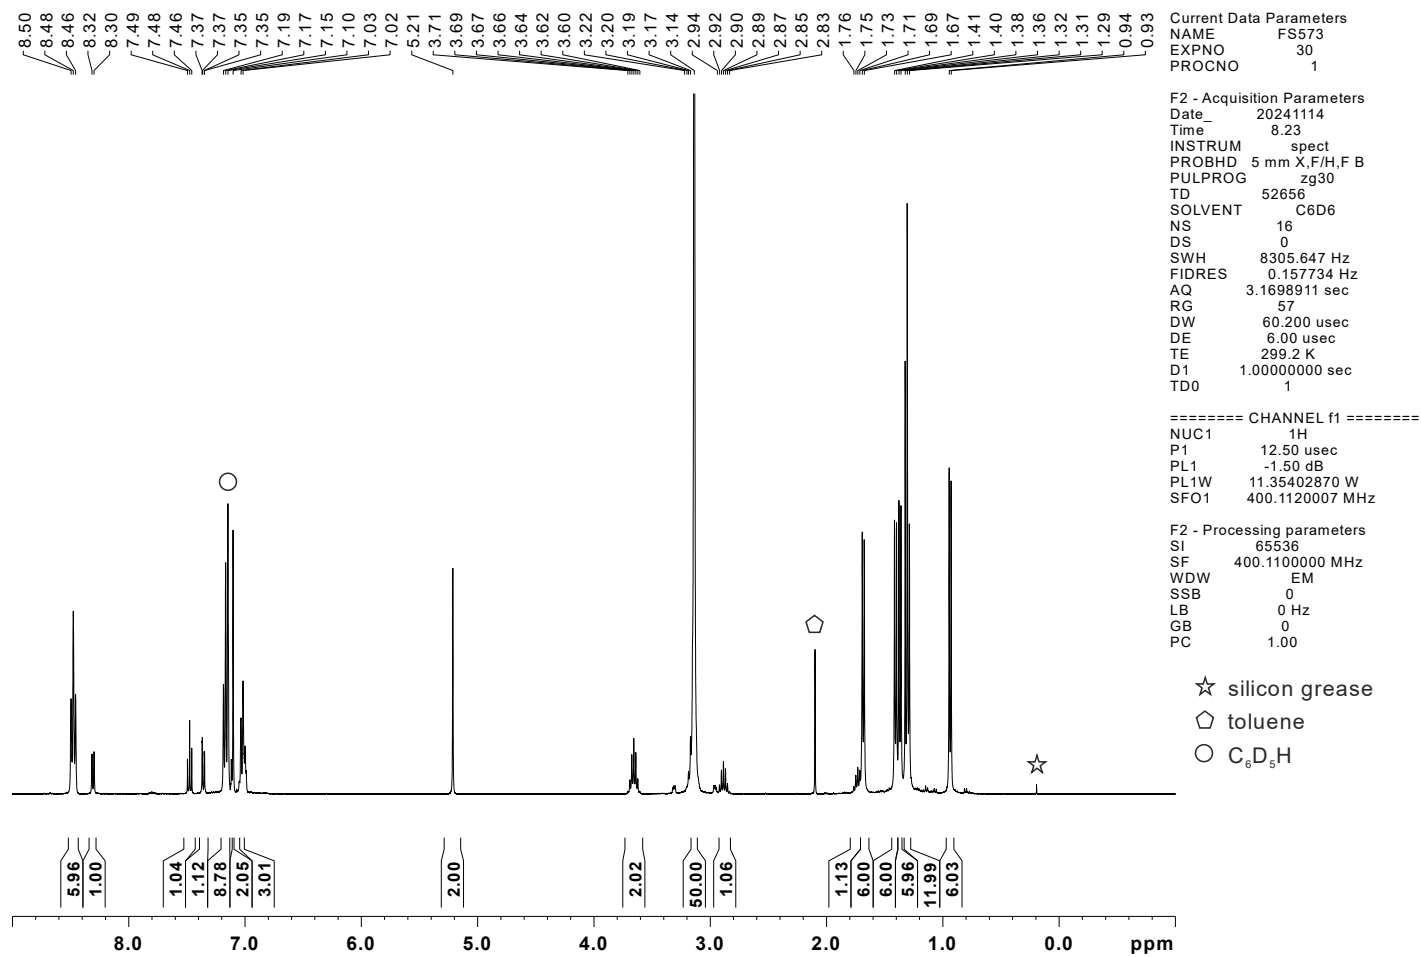Figure S110. <sup>1</sup>H NMR spectrum of compound **3b**.

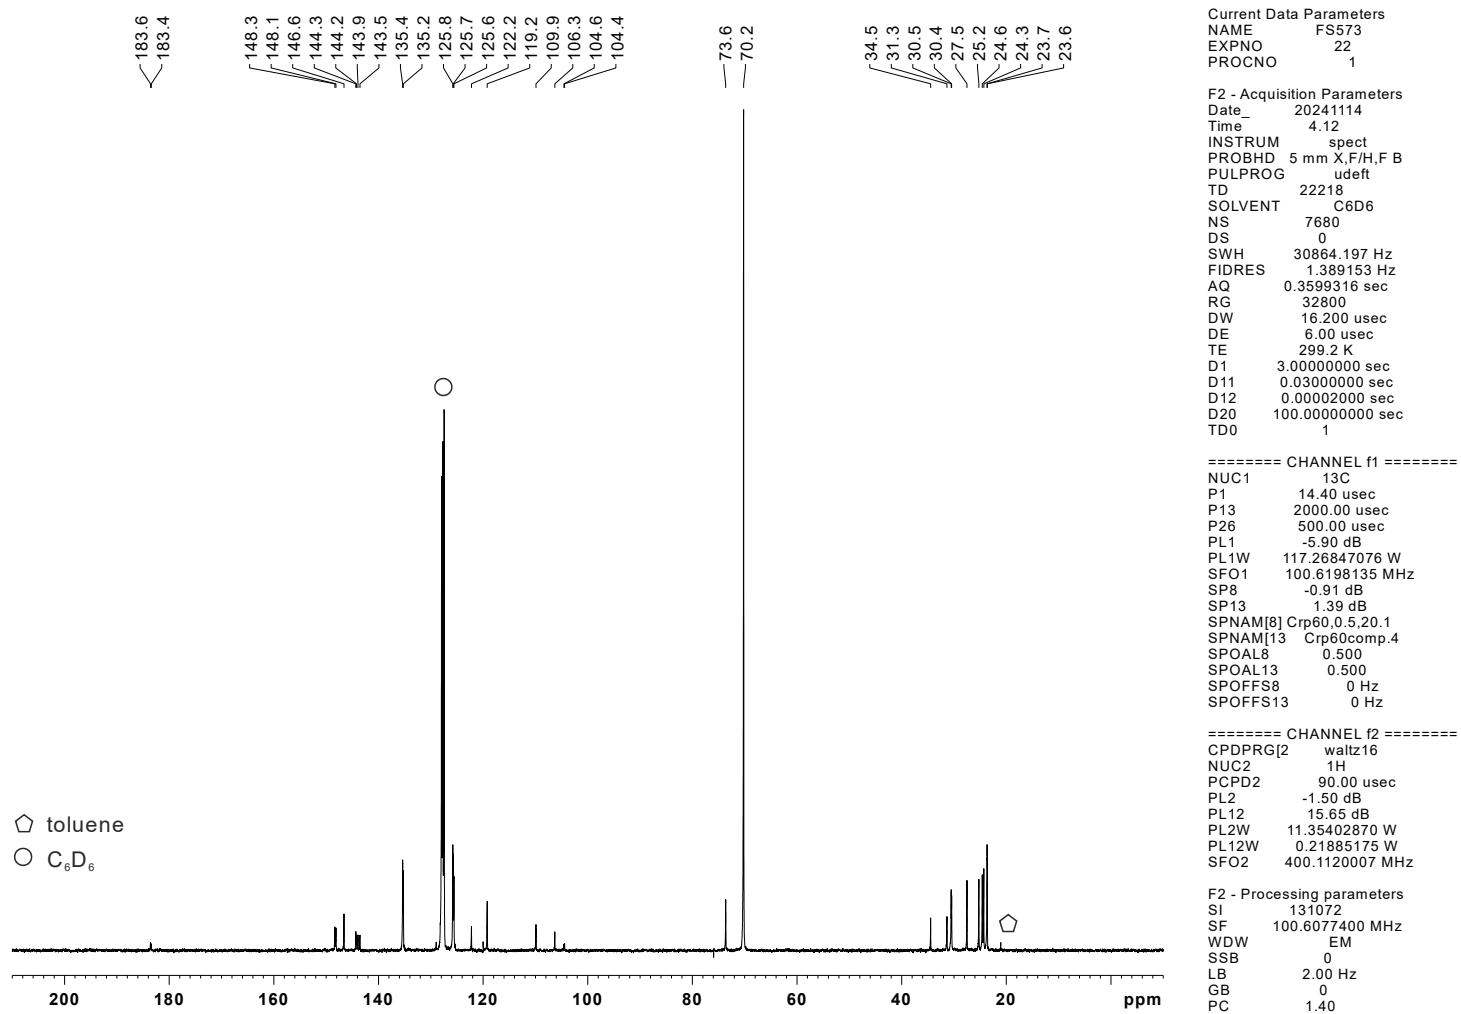Figure S111.  $^{13}\text{C}\{^1\text{H}\}$  NMR spectrum of compound **3b**.

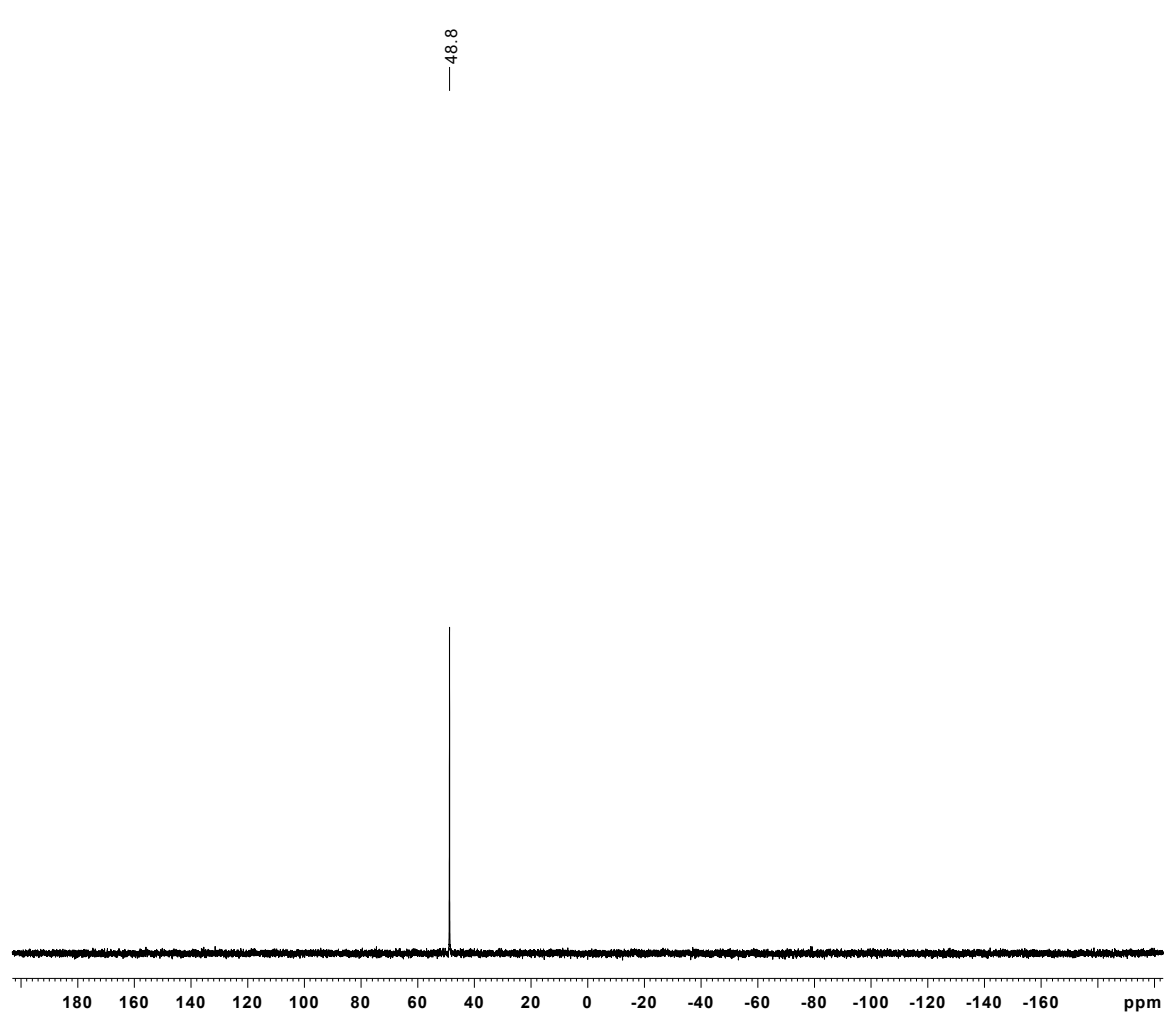

Current Data Parameters  
NAME FS573  
EXPNO 21  
PROCNO 1

F2 - Acquisition Parameters  
Date\_ 20241113  
Time 20.12  
INSTRUM spect  
PROBHD 5 mm X,F/H,F B  
PULPROG zgig30b  
TD 88150  
SOLVENT C6D6  
NS 128  
DS 0  
SWH 65789.477 Hz  
FIDRES 0.746336 Hz  
AQ 0.6699400 sec  
RG 23100  
DW 7.600 usec  
DE 6.00 usec  
TE 299.2 K  
D1 1.00000000 sec  
D11 0.03000000 sec  
TD0 1

==== CHANNEL f1 =====  
NUC1 31P  
P1 14.50 usec  
PL1 -4.00 dB  
PL1W 56.78615952 W  
SFO1 161.9674968 MHz

==== CHANNEL f2 =====  
CPDPRG2 waltz16  
NUC2 1H  
PCPD2 90.00 usec  
PL2 -1.50 dB  
PL12 15.65 dB  
PL2W 11.35402870 W  
PL12W 0.21885175 W  
SFO2 400.1120007 MHz

F2 - Processing parameters  
SI 131072  
SF 161.9674970 MHz  
WDW EM  
SSB 0  
LB 3.00 Hz  
GB 0  
PC 1.40

Figure S112.  $^{31}\text{P}\{^1\text{H}\}$  NMR spectrum of compound **3b**.

NMR spectra of compound **4**.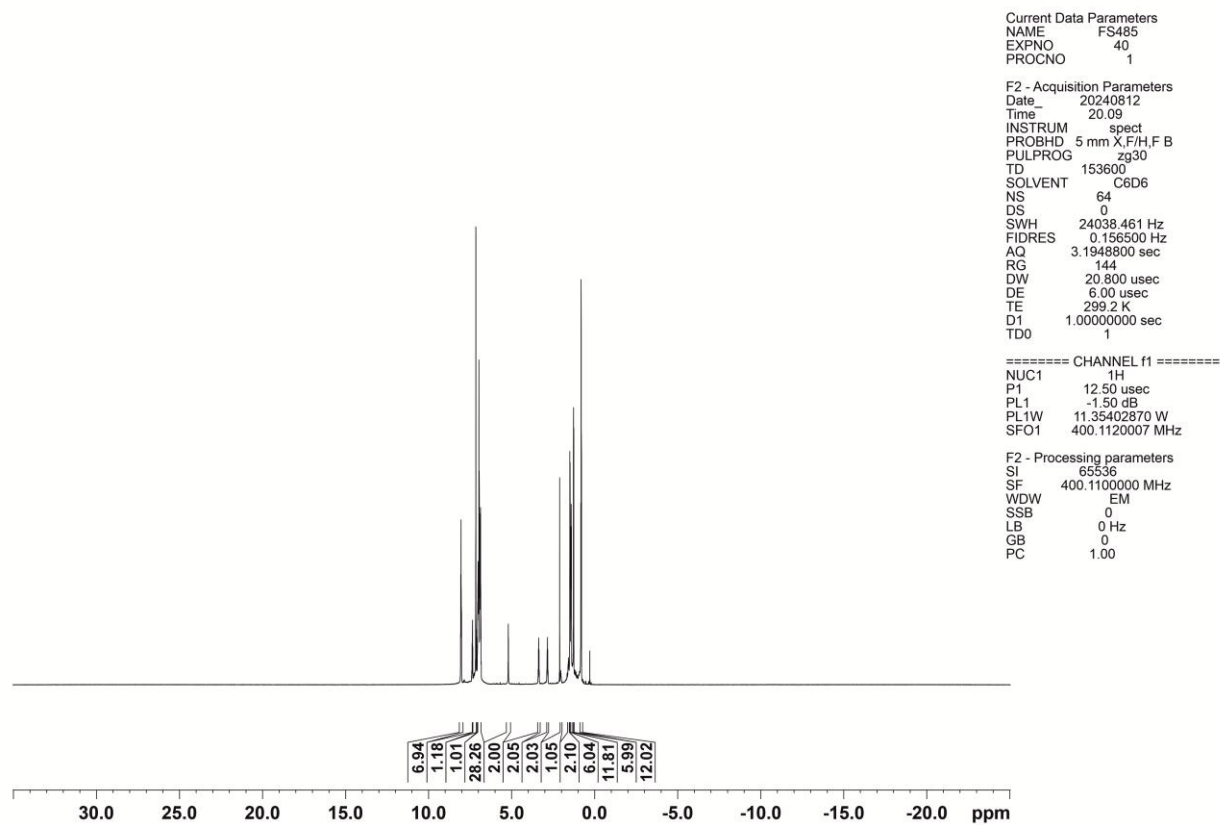Figure S113. <sup>1</sup>H NMR spectrum (-25 – 35 ppm) of compound **4**.

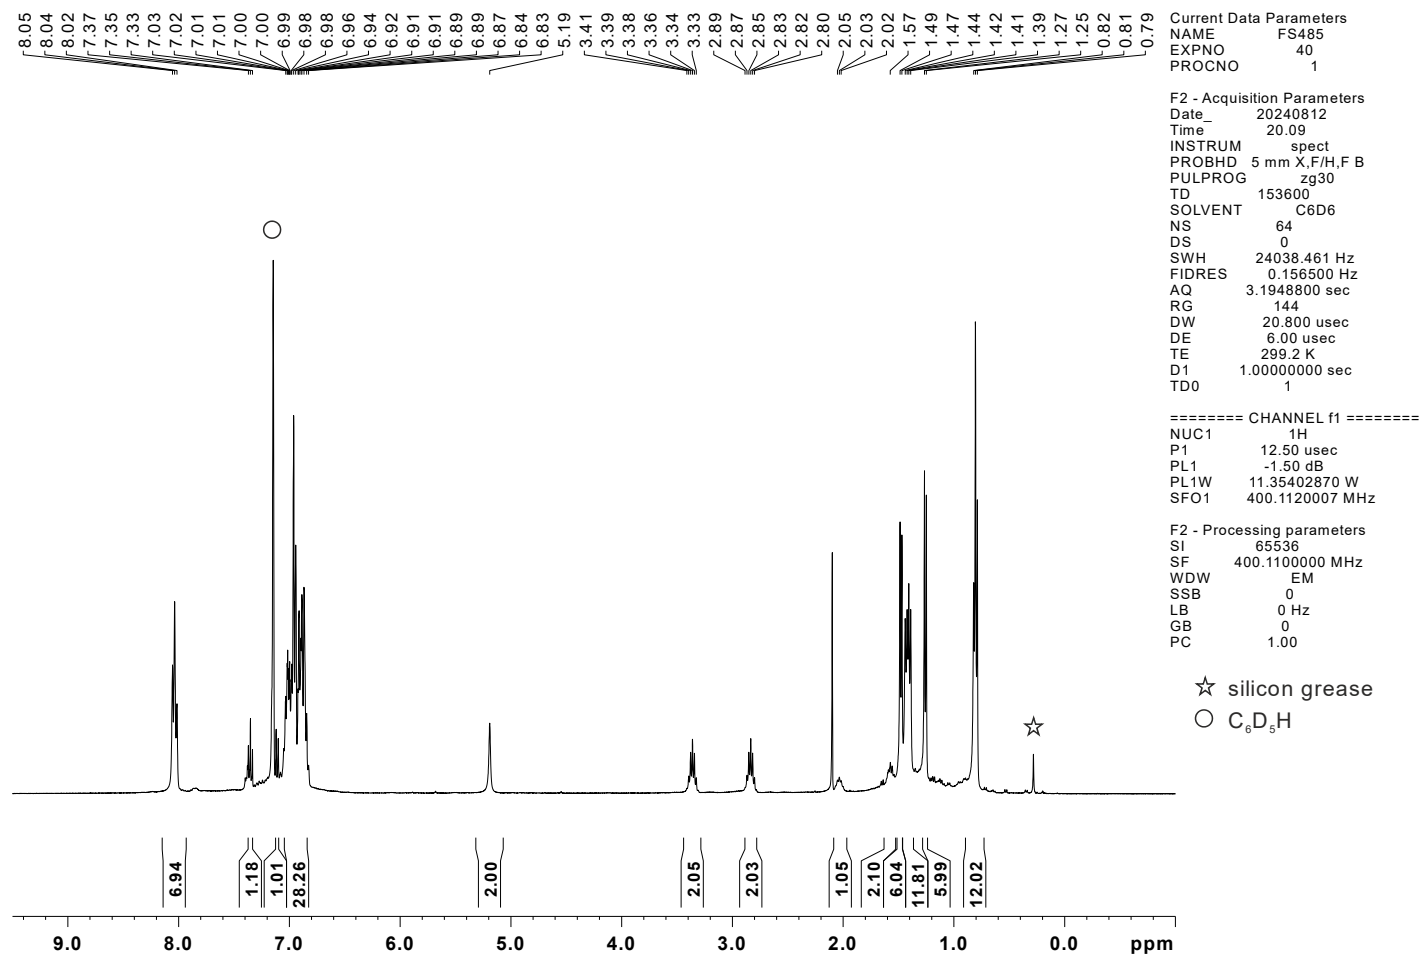Figure S114. <sup>1</sup>H NMR spectrum of compound 4.

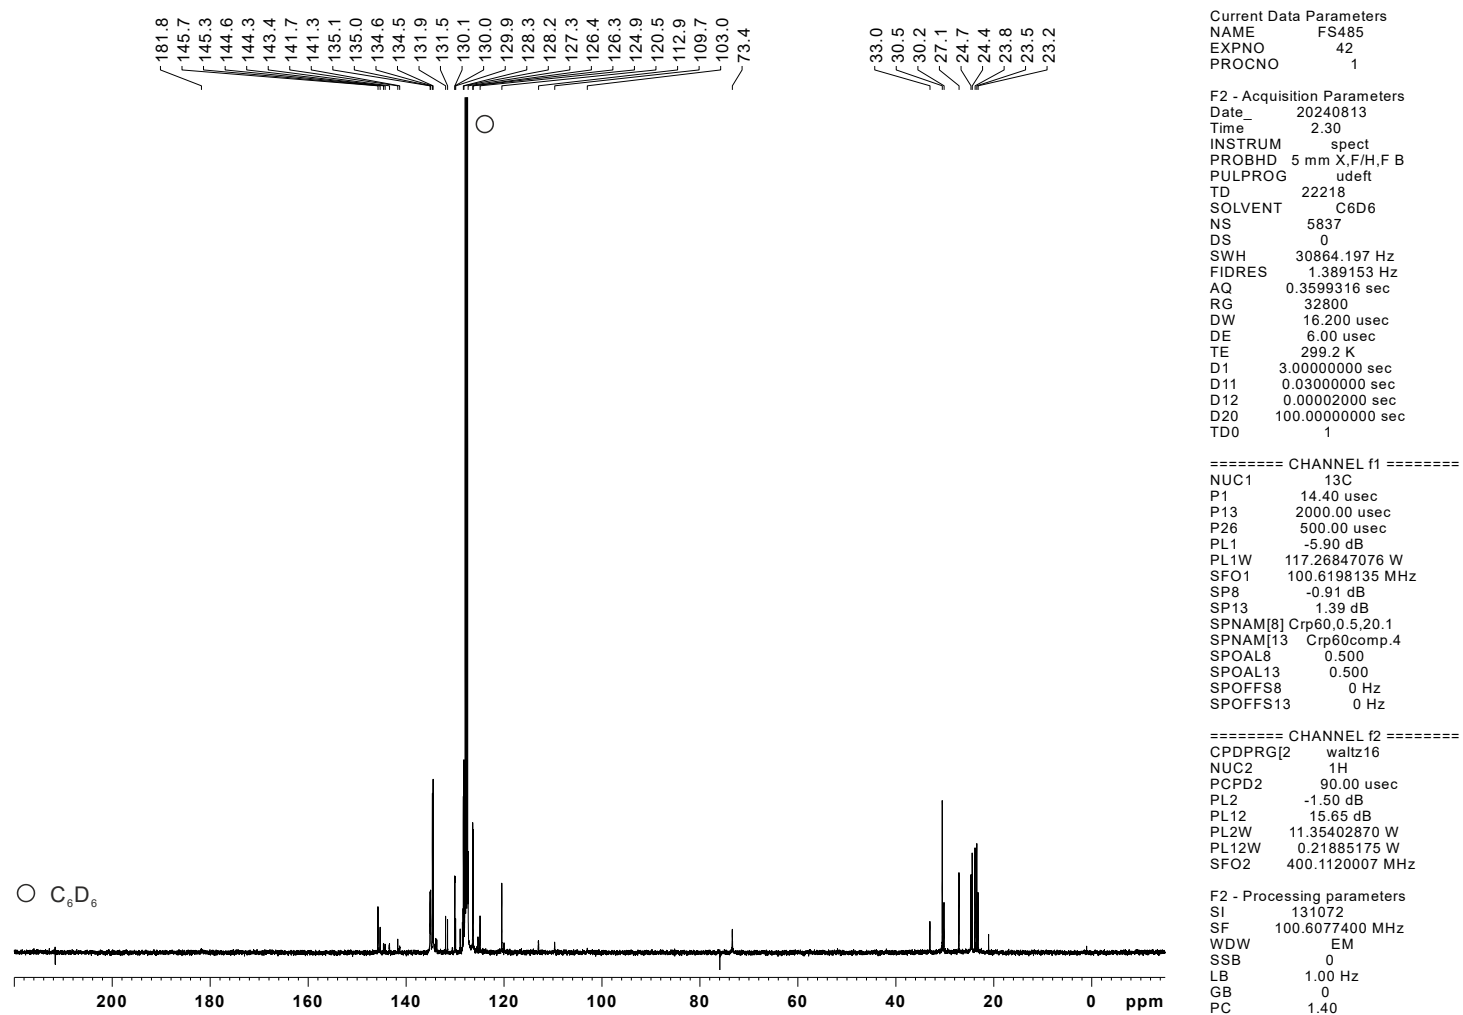Figure S115. <sup>13</sup>C{<sup>1</sup>H} NMR spectrum of compound 4.

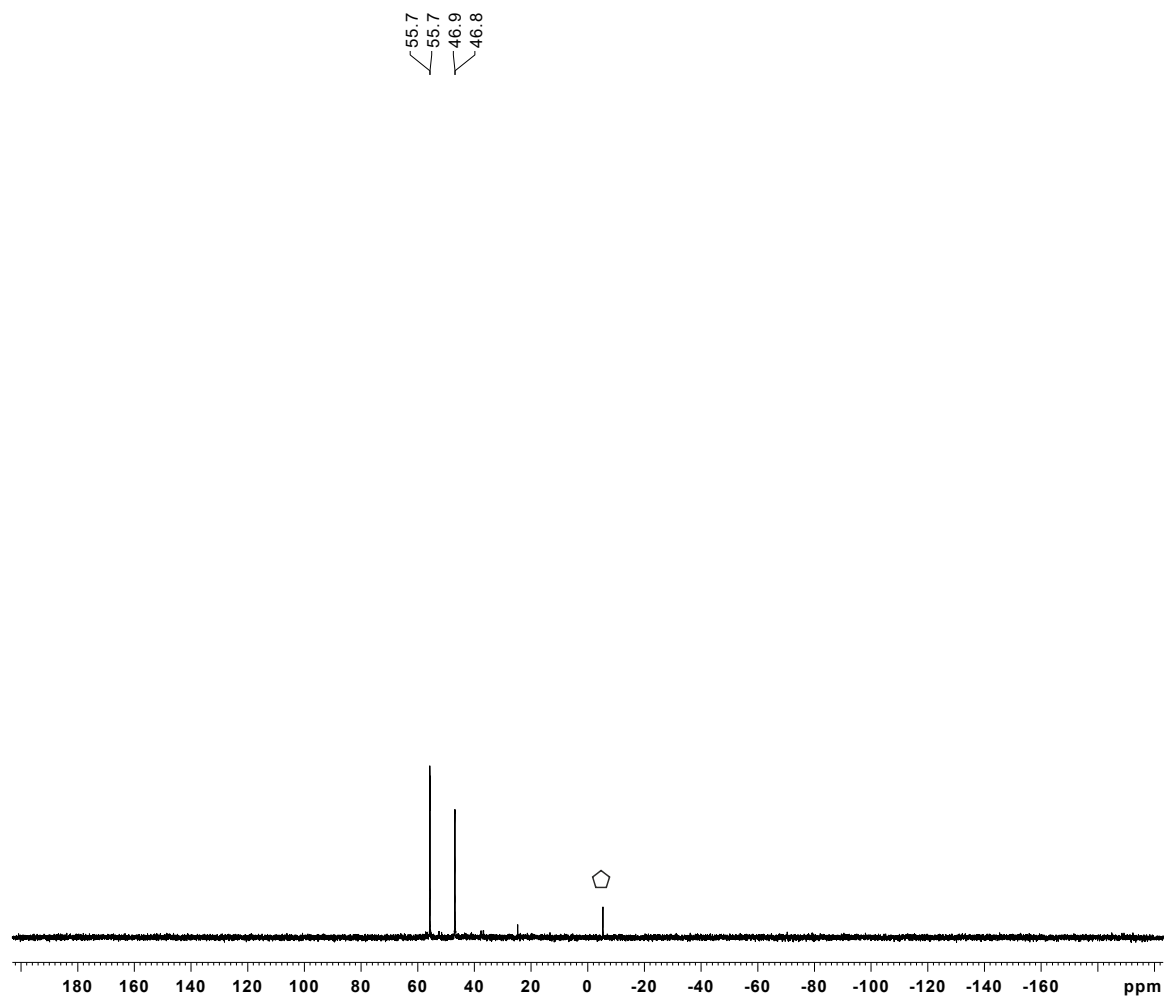

Current Data Parameters  
 NAME FS485  
 EXPNO 61  
 PROCNO 1

F2 - Acquisition Parameters  
 Date\_ 20240911  
 Time 12.06  
 INSTRUM spect  
 PROBHD 5 mm X,F/H,F B  
 PULPROG zgig30b  
 TD 88150  
 SOLVENT C6D6  
 NS 128  
 DS 0  
 SWH 65789.477 Hz  
 FIDRES 0.746336 Hz  
 AQ 0.6699400 sec  
 RG 23100  
 DW 7.600 usec  
 DE 6.00 usec  
 TE 299.2 K  
 D1 1.00000000 sec  
 D11 0.03000000 sec  
 TD0 1

==== CHANNEL f1 =====  
 NUC1 31P  
 P1 14.50 usec  
 PL1 -4.00 dB  
 PL1W 56.78615952 W  
 SFO1 161.9674970 MHz

==== CHANNEL f2 =====  
 CPDPRG2 waltz16  
 NUC2 1H  
 PCPD2 90.00 usec  
 PL2 -1.50 dB  
 PL12 15.65 dB  
 PL2W 11.35402870 W  
 PL12W 0.21885175 W  
 SFO2 400.1120007 MHz

F2 - Processing parameters  
 SI 131072  
 SF 161.9674970 MHz  
 WDW EM  
 SSB 0  
 LB 3.00 Hz  
 GB 0  
 PC 1.40

⬡ PPh<sub>3</sub> impurity

Figure S116. <sup>31</sup>P{<sup>1</sup>H} NMR spectrum of compound 4.

NMR spectra of compound **5**.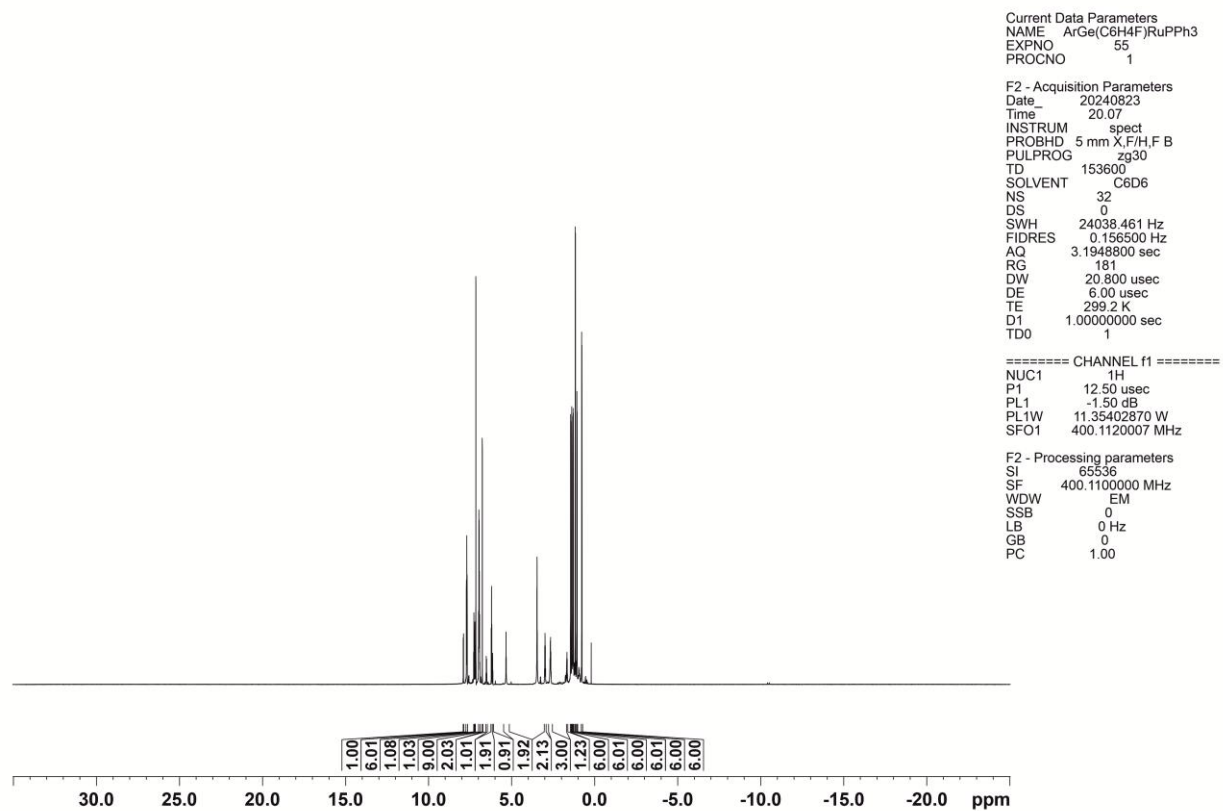Figure S117.  $^1\text{H}$  NMR spectrum (-25 – 35 ppm) of compound **5**.

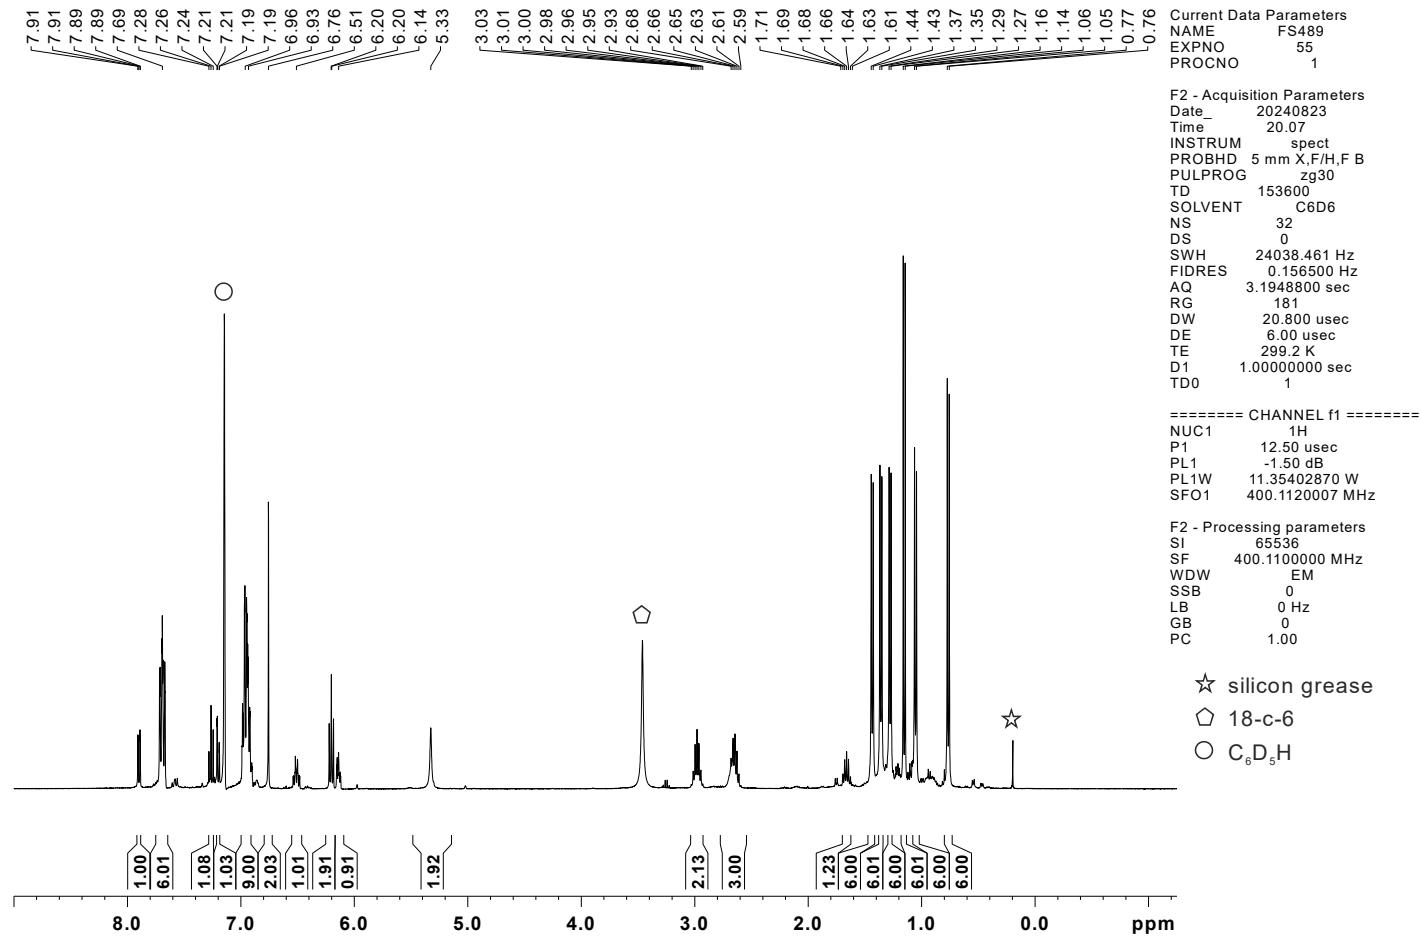Figure S118. <sup>1</sup>H NMR spectrum of compound **5**.

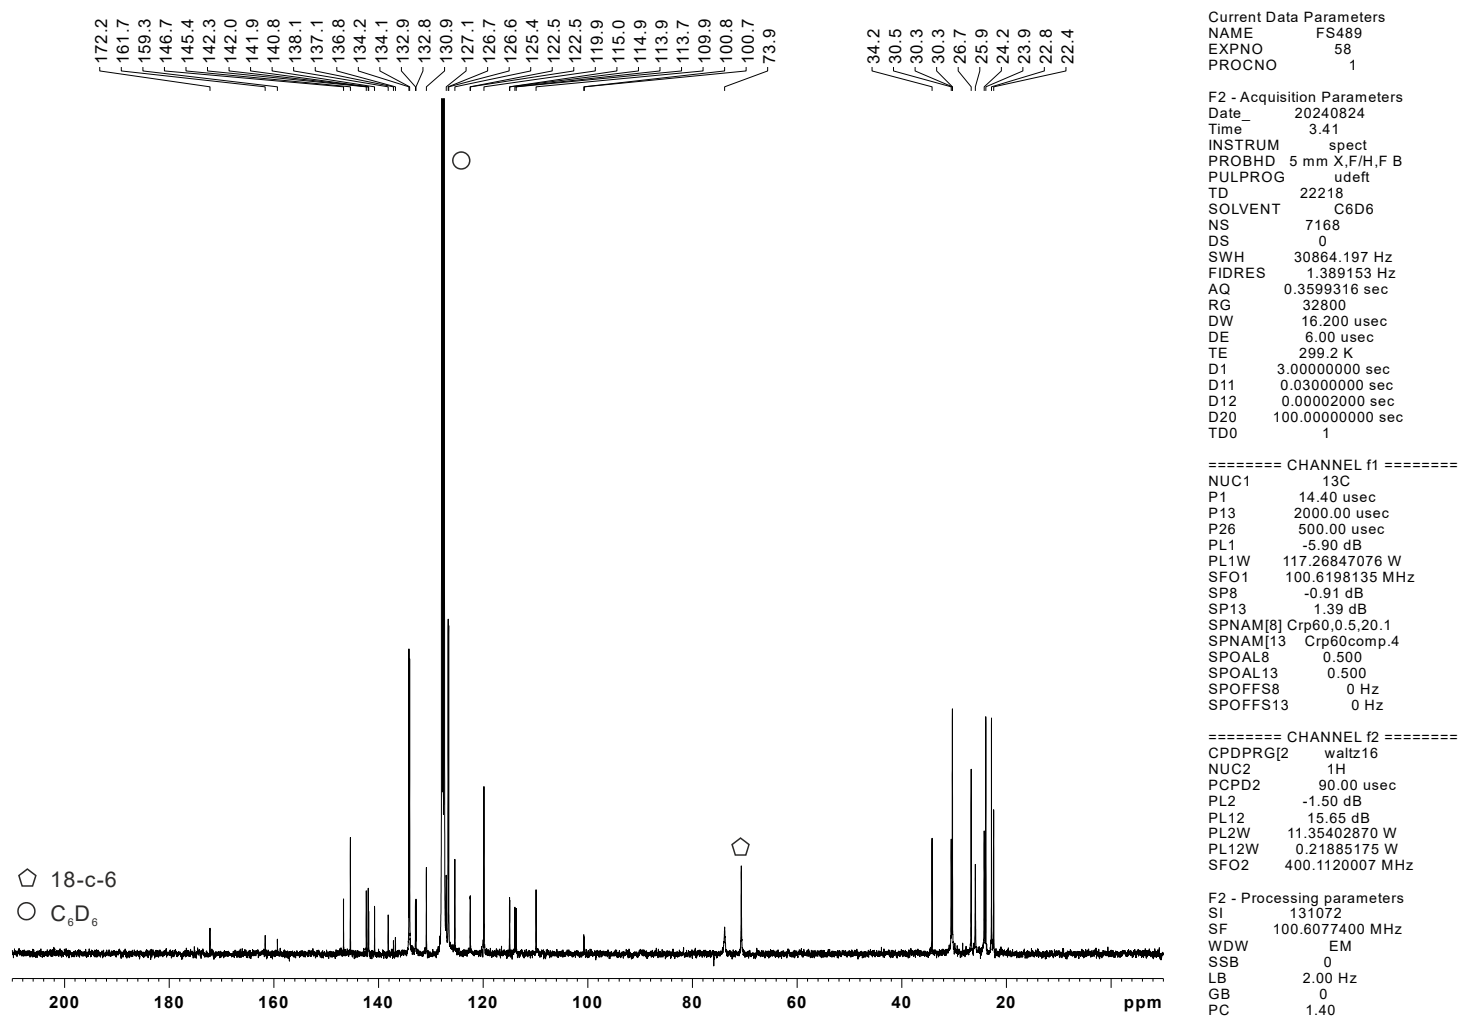Figure S119.  $^{13}\text{C}\{^1\text{H}\}$  NMR spectrum of compound 5.

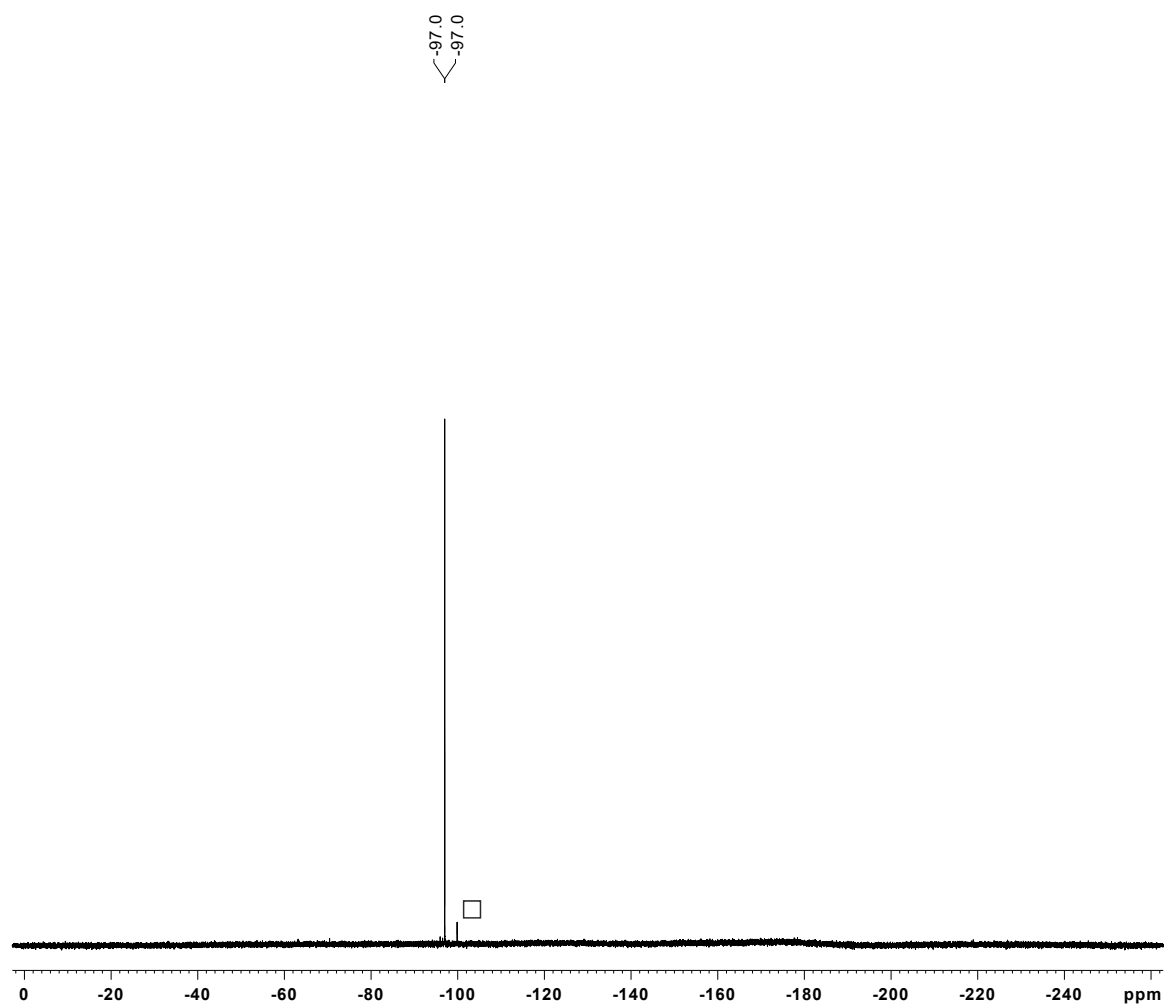

Current Data Parameters  
 NAME FS489  
 EXPNO 53  
 PROCNO 1

F2 - Acquisition Parameters  
 Date\_ 20240823  
 Time 11.50  
 INSTRUM spect  
 PROBHD 5 mm X,F/H,F B  
 PULPROG zgfhigqn  
 TD 131072  
 SOLVENT C6D6  
 NS 64  
 DS 0  
 SWH 100000.000 Hz  
 FIDRES 0.762939 Hz  
 AQ 0.6553600 sec  
 RG 4100  
 DW 5.000 usec  
 DE 6.00 usec  
 TE 299.2 K  
 D1 1.00000000 sec  
 D11 0.03000000 sec  
 D12 0.00002000 sec  
 TD0 1

==== CHANNEL f1 =====  
 NUC1 19F  
 P1 19.70 usec  
 PL1 -6.00 dB  
 PL1W 62.00000000 W  
 SFO1 376.4306030 MHz

==== CHANNEL f2 =====  
 CPDPRG2 waltz16  
 NUC2 1H  
 PCPD2 90.00 usec  
 PL2 -1.50 dB  
 PL12 15.65 dB  
 PL2W 11.35402870 W  
 PL12W 0.21885175 W  
 SFO2 400.1120007 MHz

F2 - Processing parameters  
 SI 262144  
 SF 376.4795470 MHz  
 WDW EM  
 SSB 0  
 LB 2.00 Hz  
 GB 0  
 PC 1.00

impurity

Figure S120.  $^{19}\text{F}\{^1\text{H}\}$  NMR spectrum of compound 5.

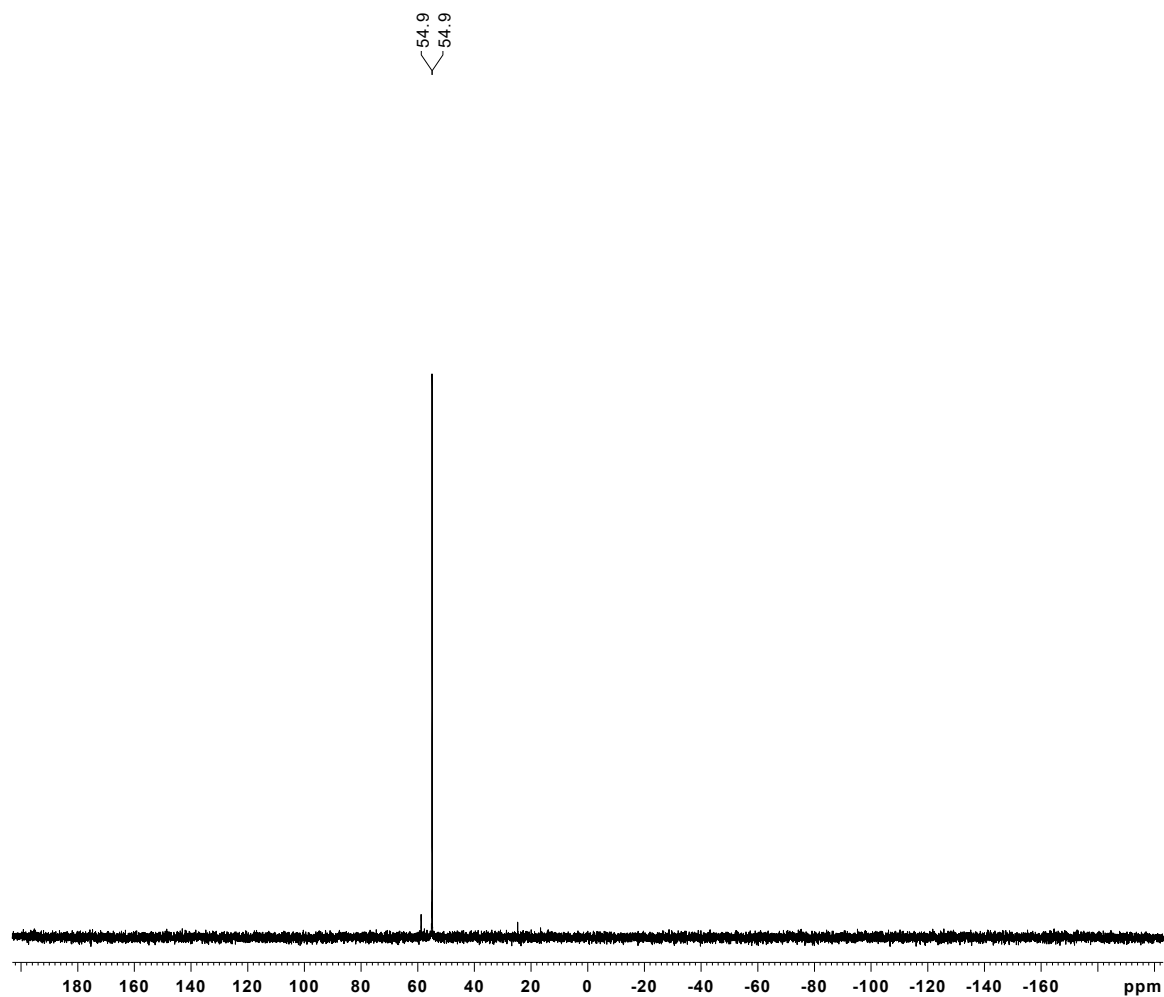

Current Data Parameters  
NAME FS489  
EXPNO 57  
PROCNO 1

F2 - Acquisition Parameters  
Date\_ 20240823  
Time 20.12  
INSTRUM spect  
PROBHD 5 mm X,F/H,F B  
PULPROG zgig30b  
TD 88150  
SOLVENT C6D6  
NS 128  
DS 0  
SWH 65789.477 Hz  
FIDRES 0.746336 Hz  
AQ 0.6699400 sec  
RG 23100  
DW 7.600 usec  
DE 6.00 usec  
TE 299.2 K  
D1 1.00000000 sec  
D11 0.03000000 sec  
TD0 1

==== CHANNEL f1 =====  
NUC1 31P  
P1 14.50 usec  
PL1 -4.00 dB  
PL1W 56.78615952 W  
SFO1 161.9674970 MHz

==== CHANNEL f2 =====  
CPDPRG2 waltz16  
NUC2 1H  
PCPD2 90.00 usec  
PL2 -1.50 dB  
PL12 15.65 dB  
PL2W 11.35402870 W  
PL12W 0.21885175 W  
SFO2 400.1120007 MHz

F2 - Processing parameters  
SI 131072  
SF 161.9674970 MHz  
WDW EM  
SSB 0  
LB 3.00 Hz  
GB 0  
PC 1.40

Figure S121.  $^{31}\text{P}\{^1\text{H}\}$  NMR spectrum of compound 5.

NMR spectra of compound **6**.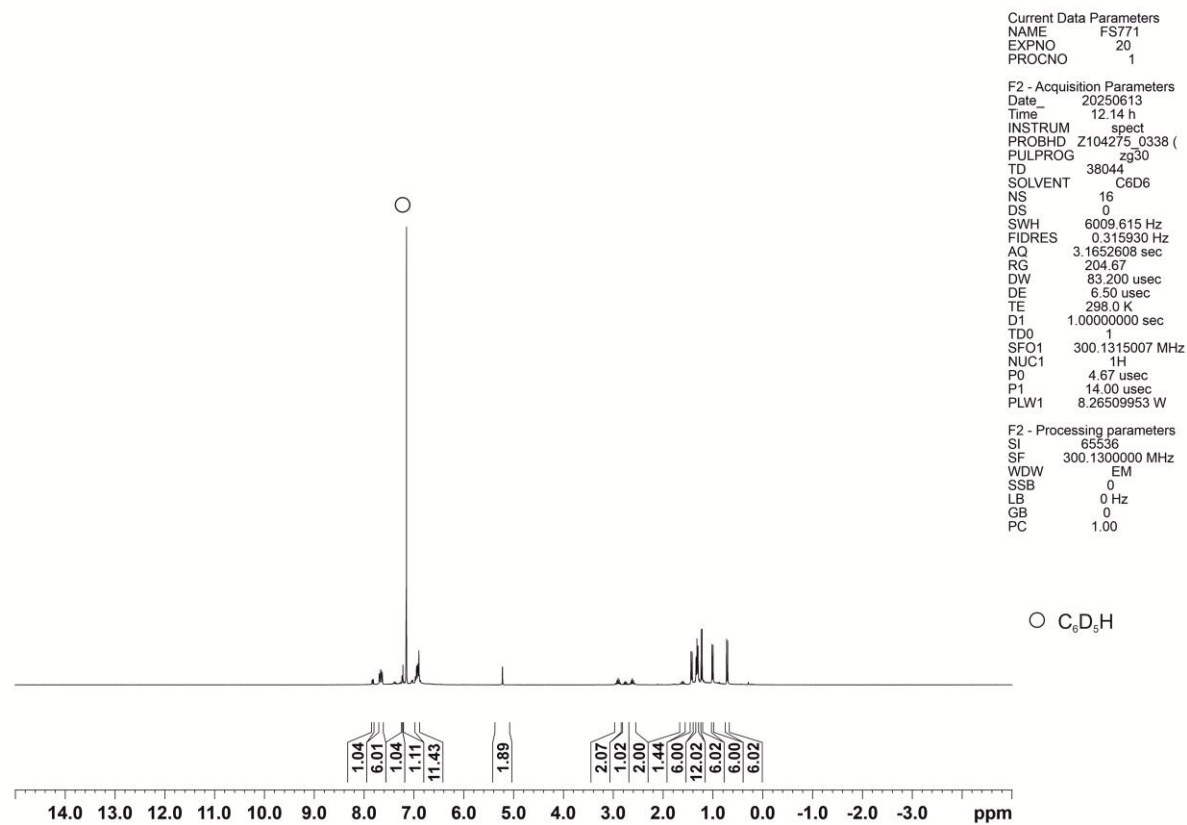Figure S122. <sup>1</sup>H NMR spectrum (–5 – 15 ppm) of compound **6**.

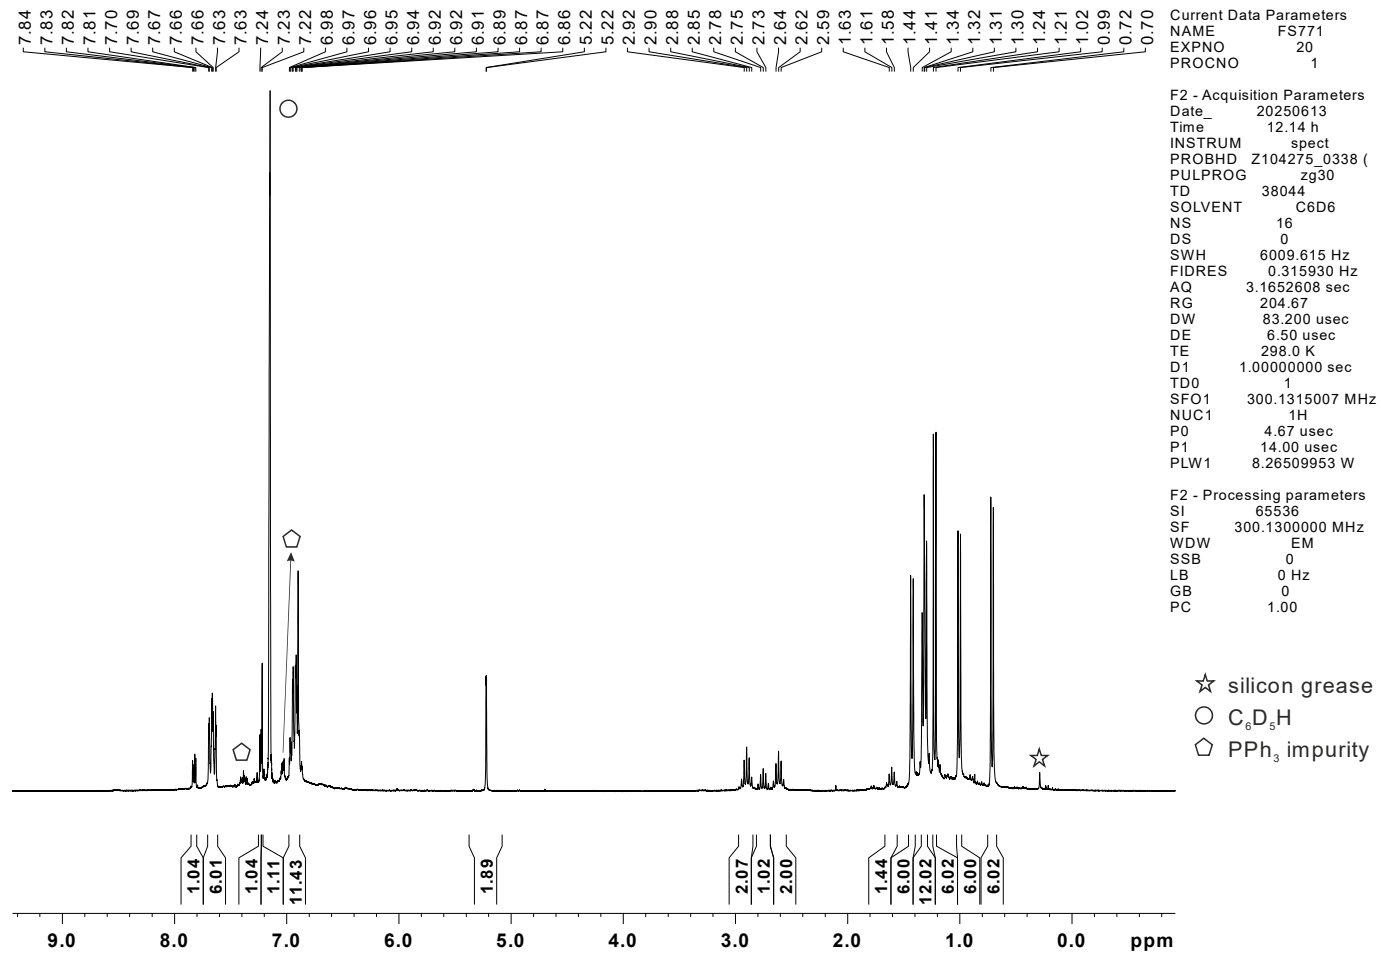Figure S123. <sup>1</sup>H NMR spectrum of compound **6**.

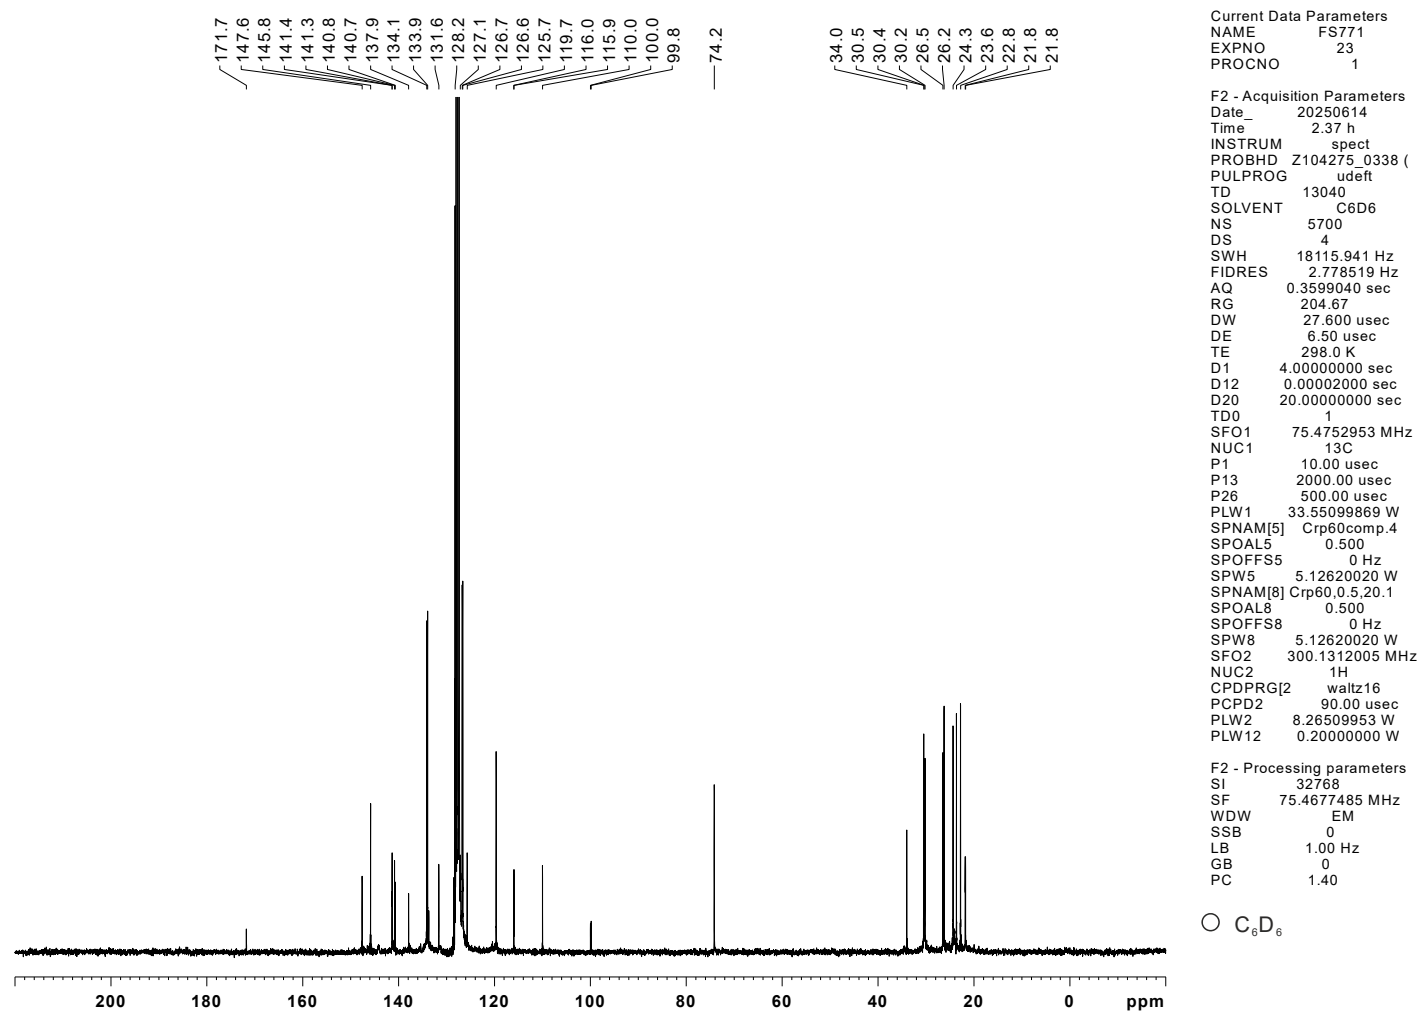Figure S124.  $^{13}\text{C}\{^1\text{H}\}$  NMR spectrum of compound **6**.

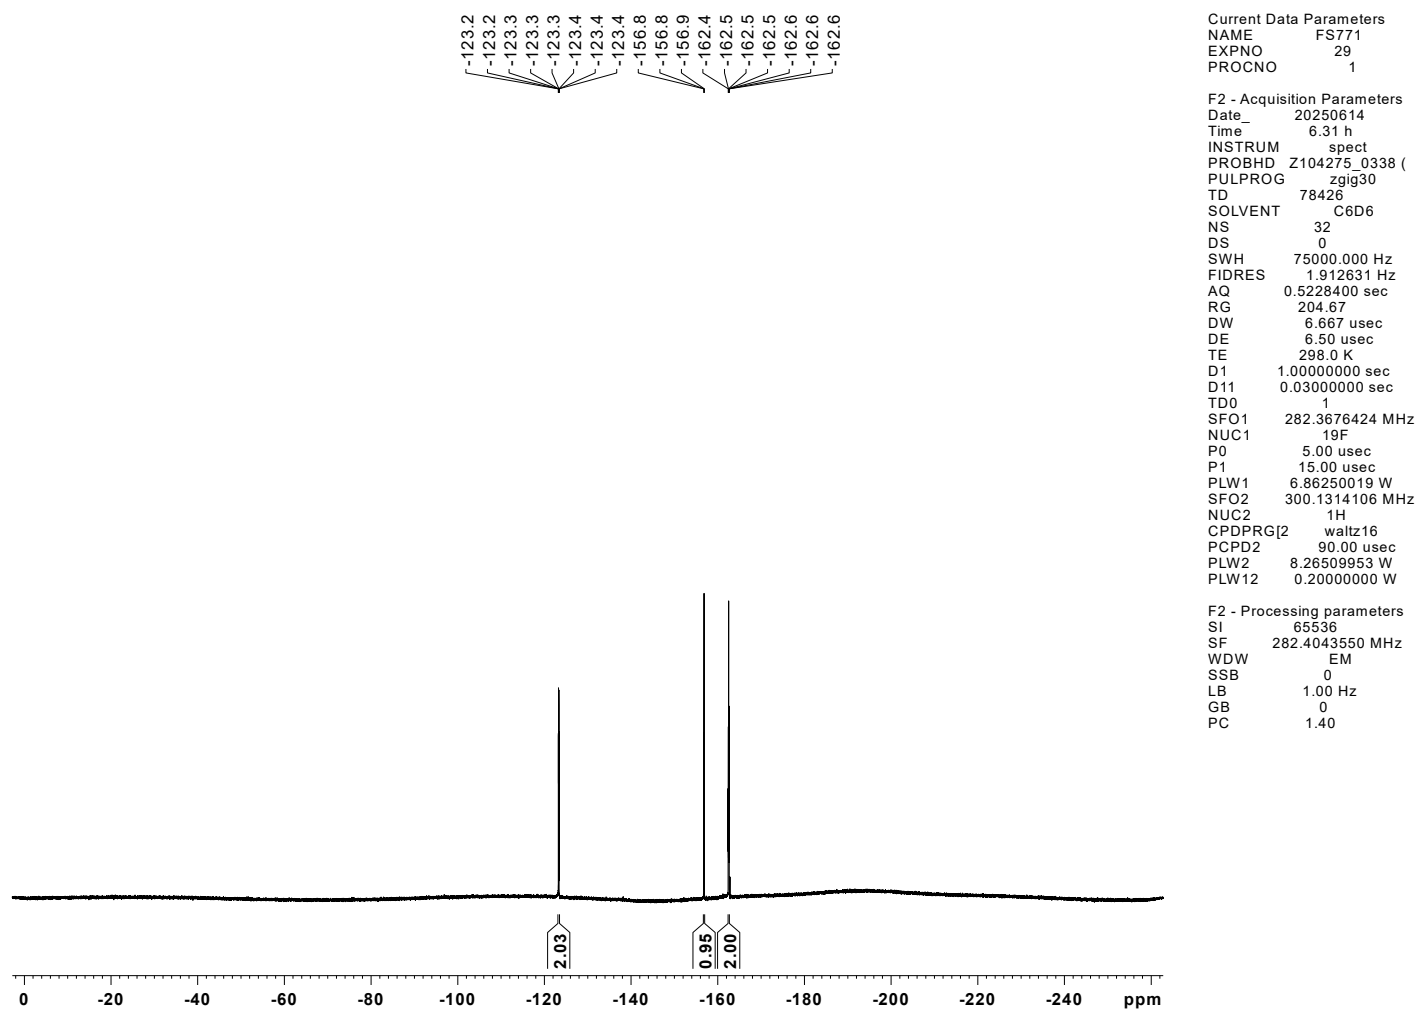Figure S125.  $^{19}\text{F}\{^1\text{H}\}$  NMR spectrum of compound **6**.

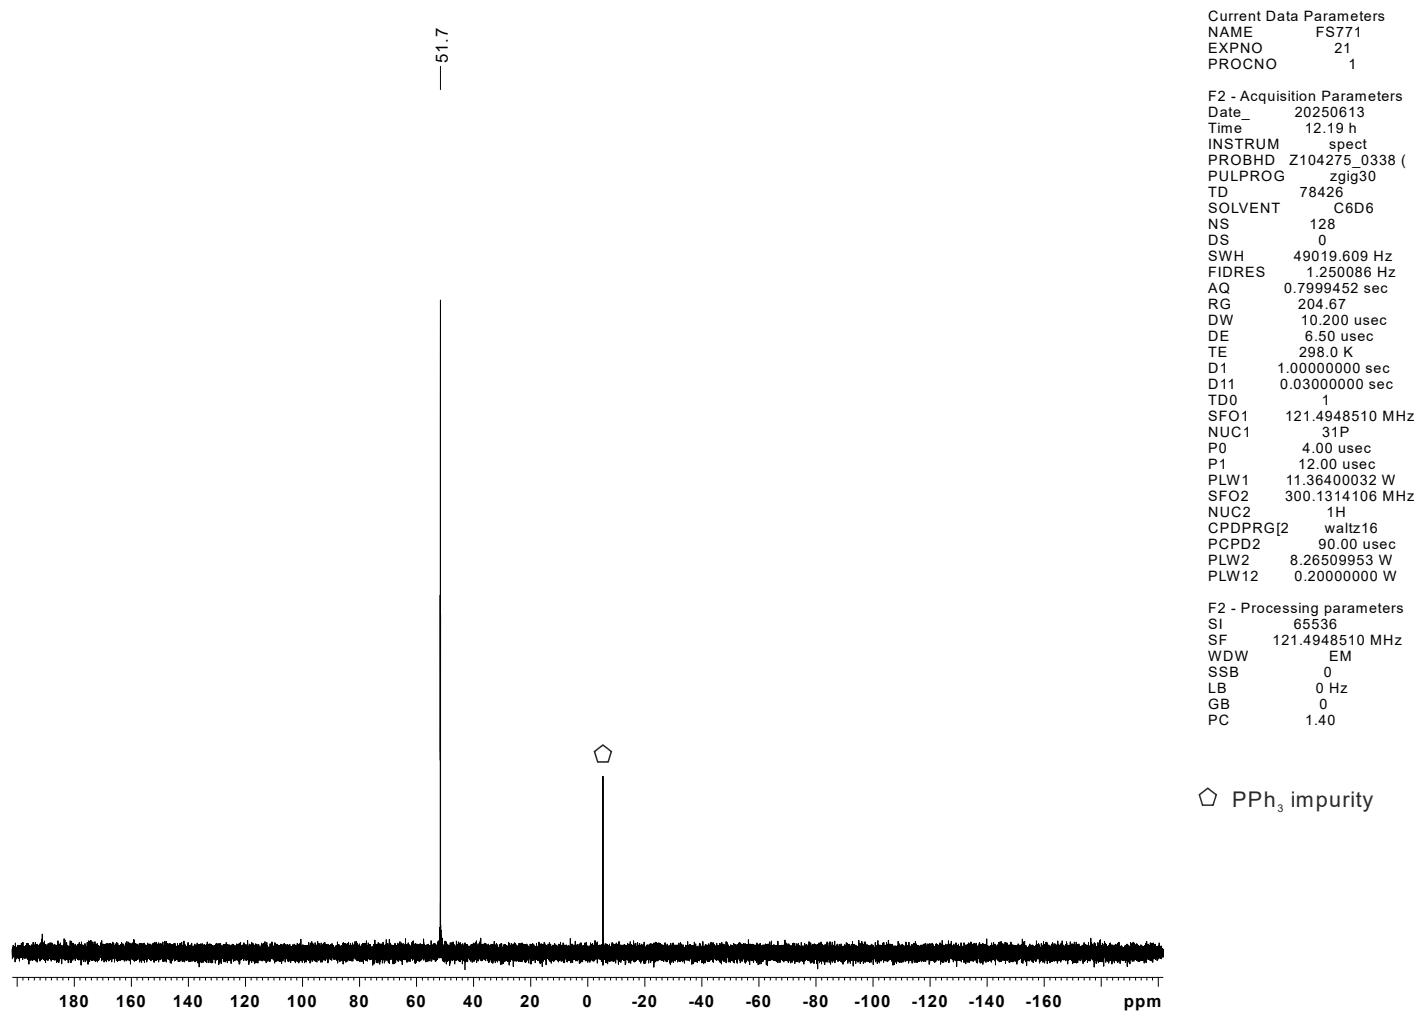Figure S126.  $^{31}\text{P}\{^1\text{H}\}$  NMR spectrum of compound **6**.

NMR spectra of compound **7**.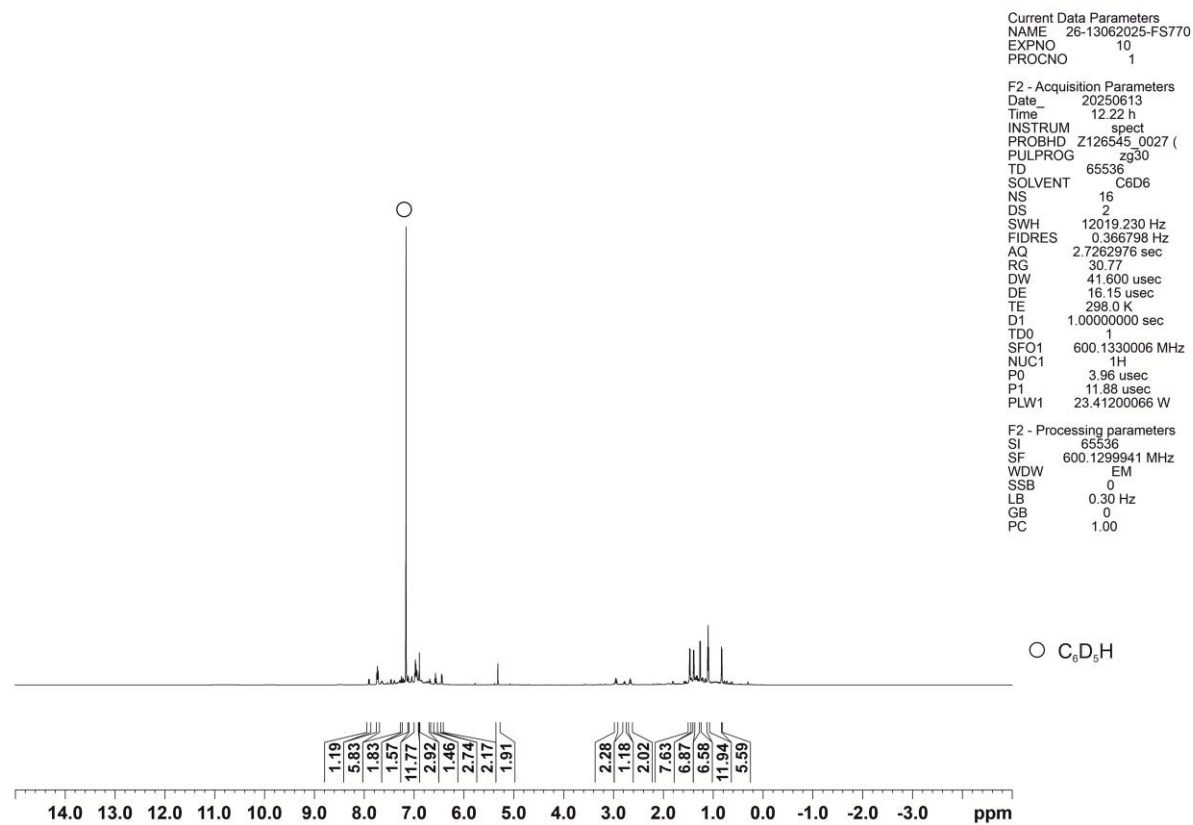Figure S127. <sup>1</sup>H NMR spectrum (–5 – 15 ppm) of compound **7**.

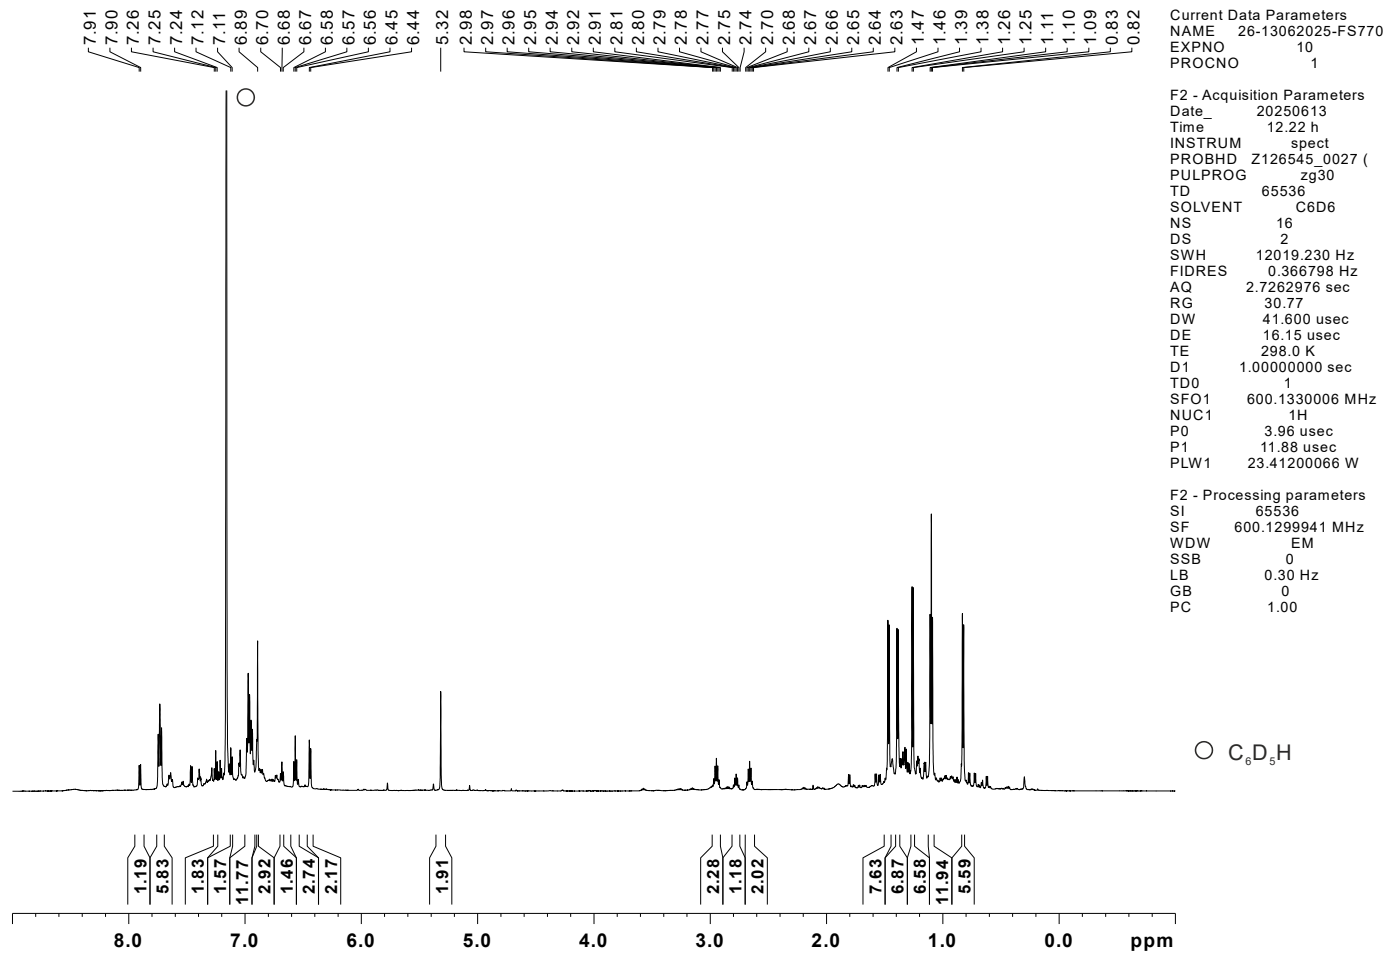Figure S128. <sup>1</sup>H NMR spectrum of compound 7.

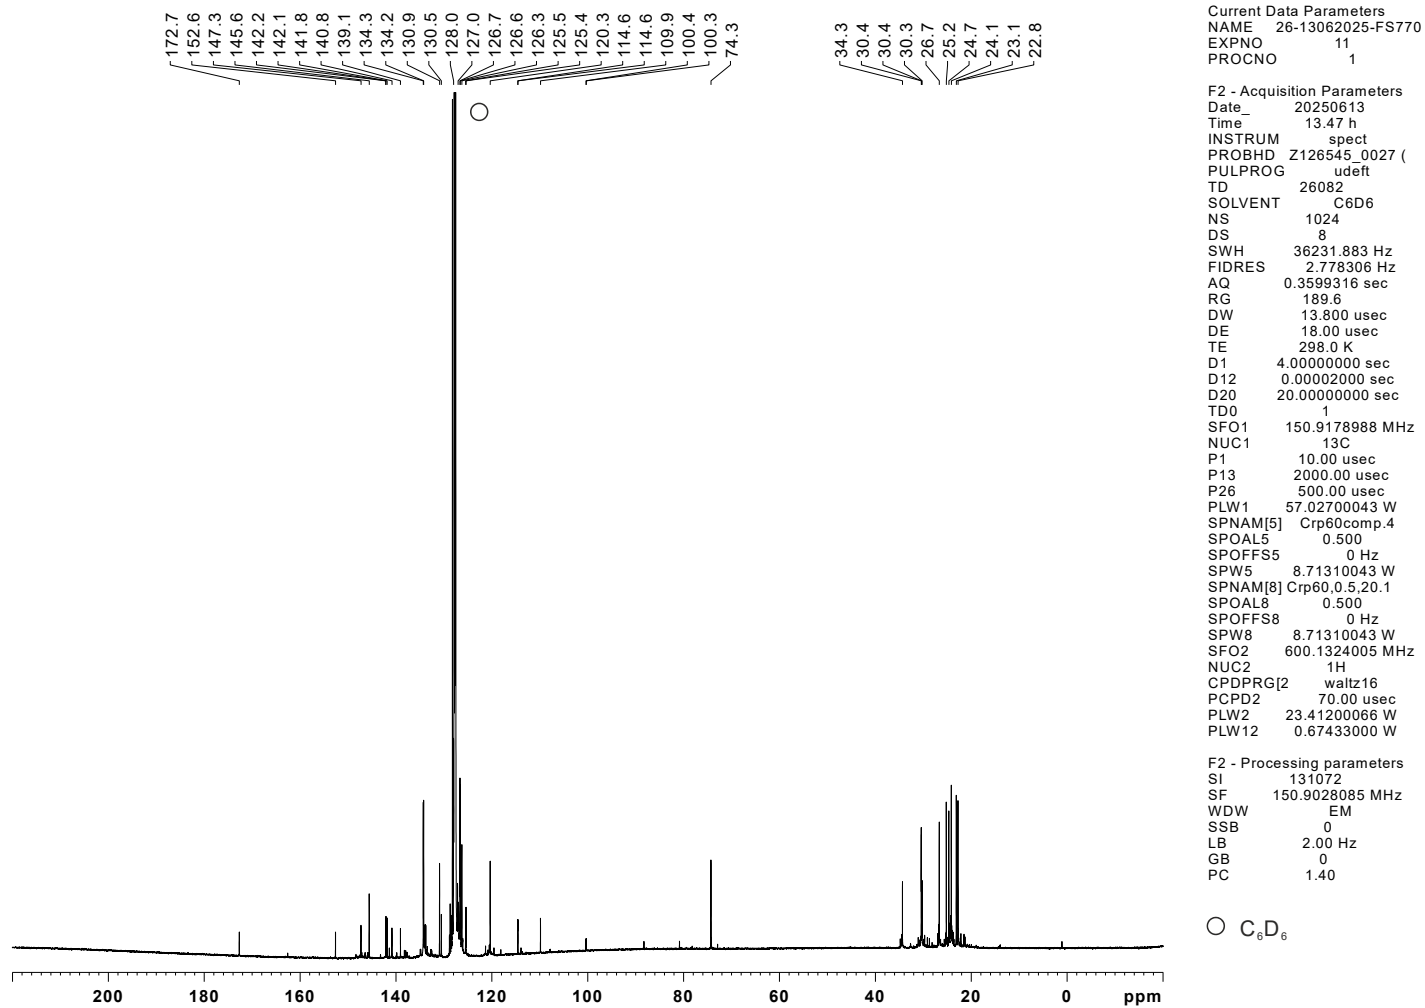Figure SI29.  $^{13}\text{C}\{^1\text{H}\}$  NMR spectrum of compound 7.

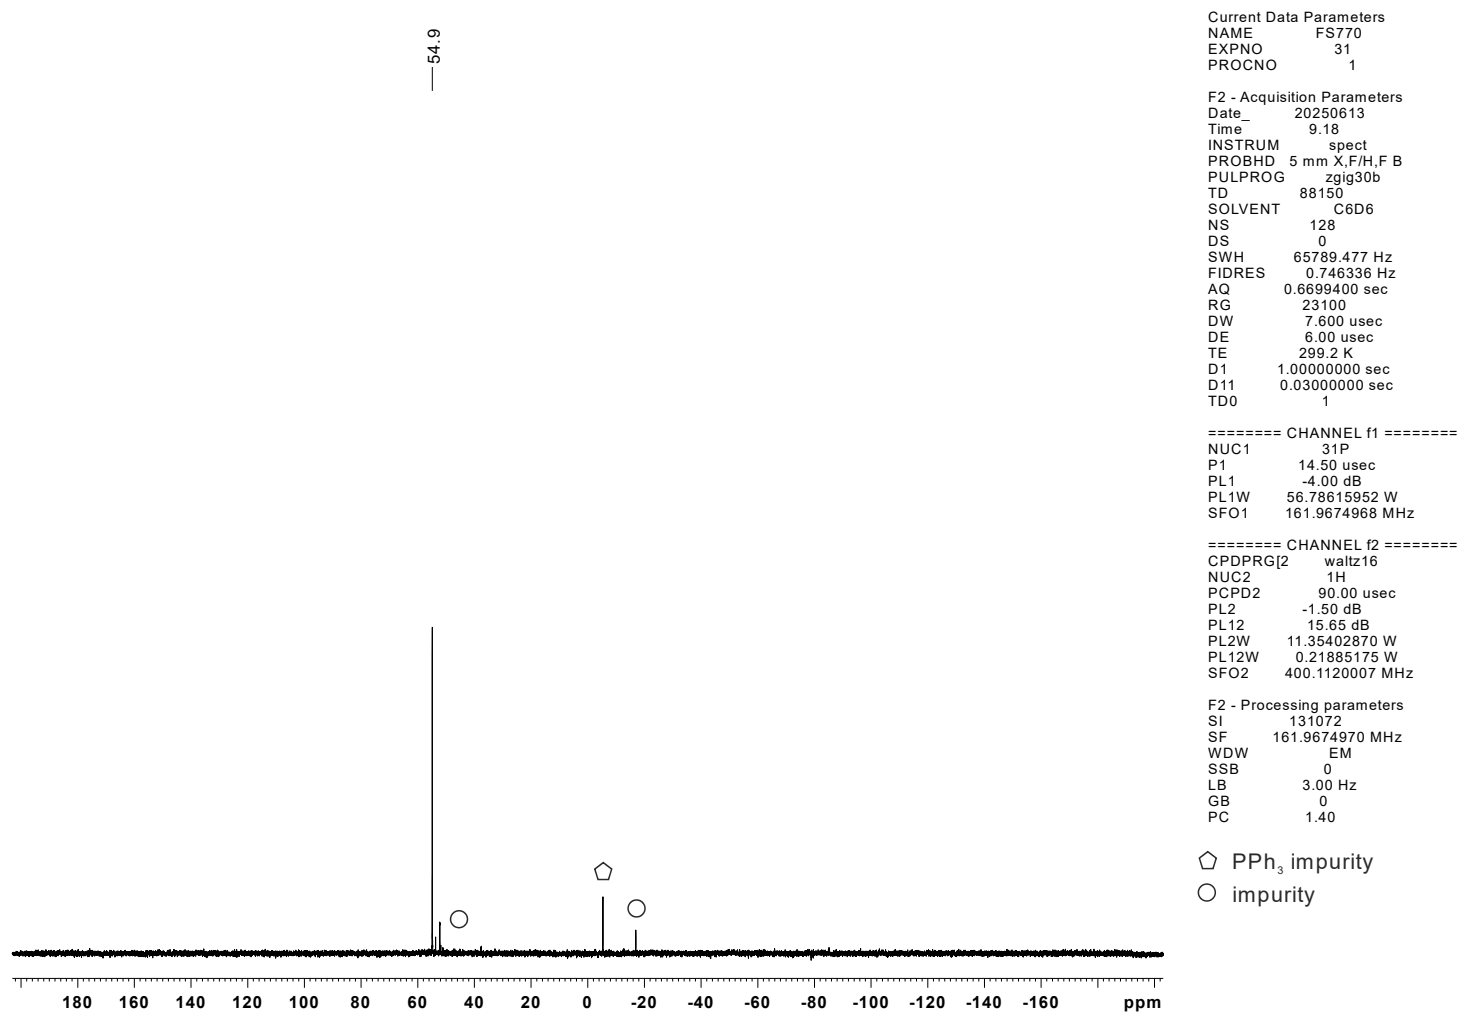Figure S130.  $^{31}\text{P}\{^1\text{H}\}$  NMR spectrum of compound 7.

## UV-Vis spectroscopy

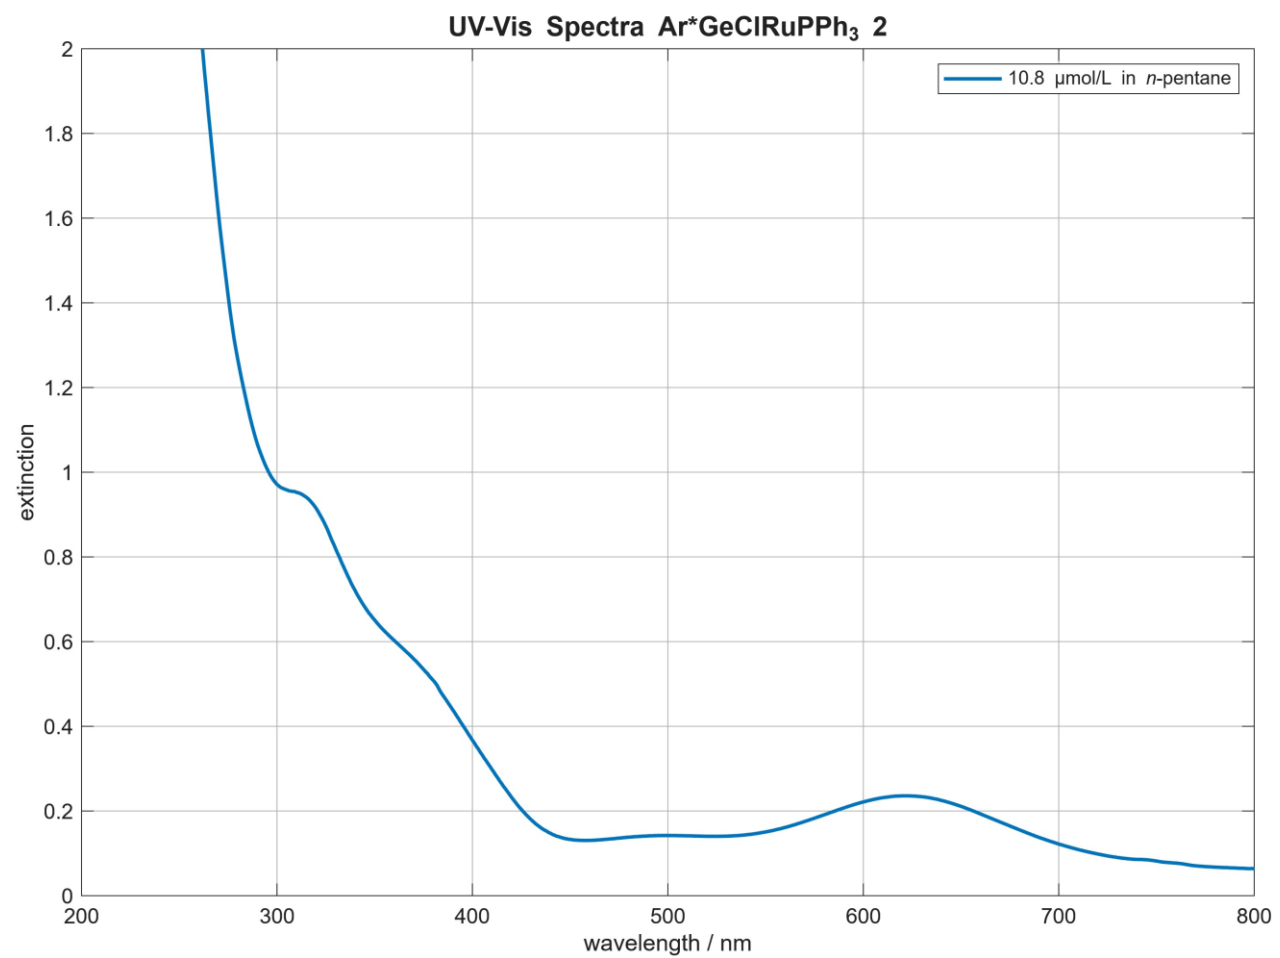Figure S131. UV-Vis spectrum of compound **2**.

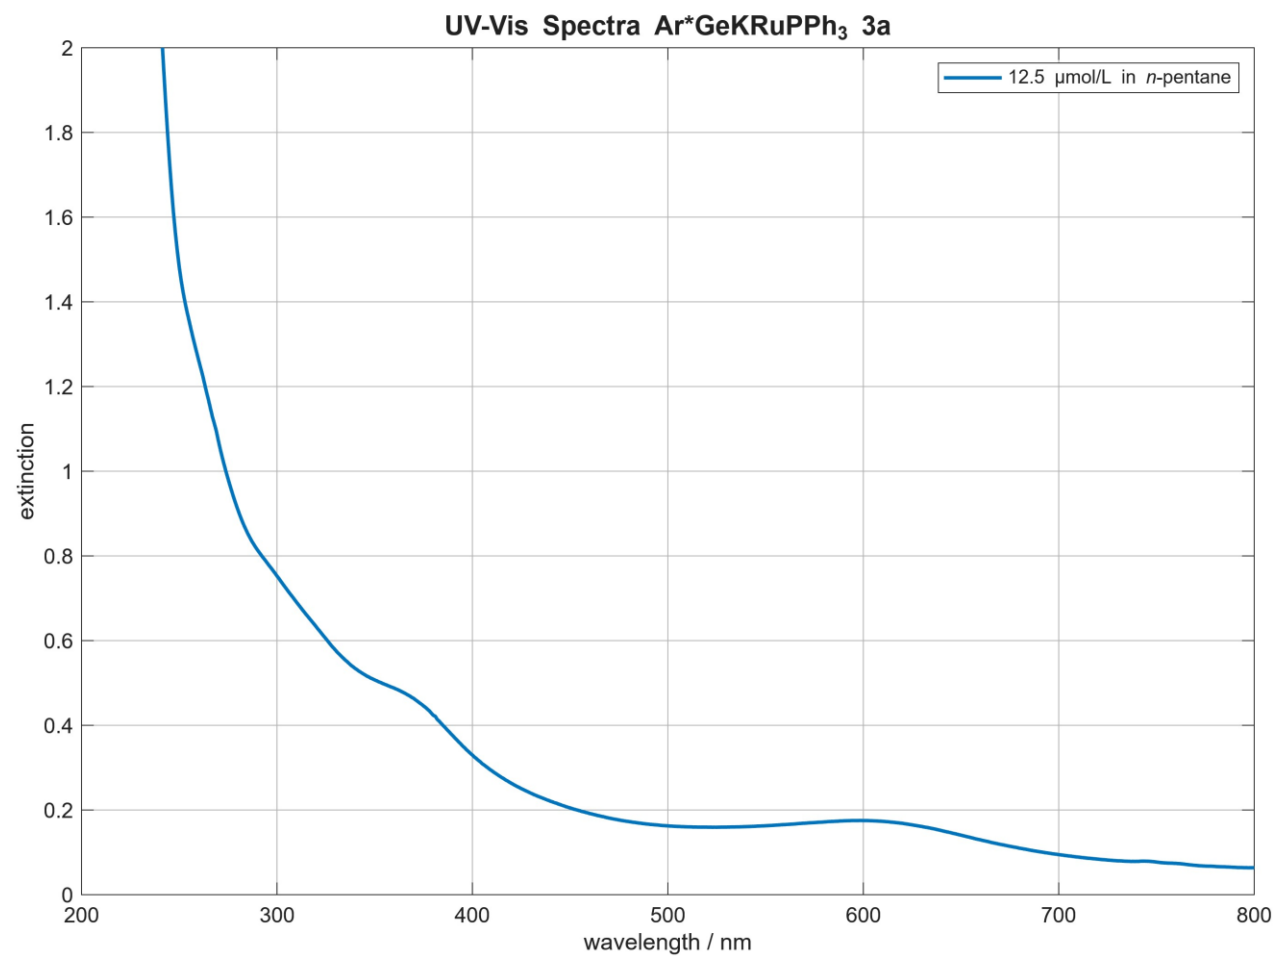

Figure SI32. UV-Vis spectrum of compound **3a**.

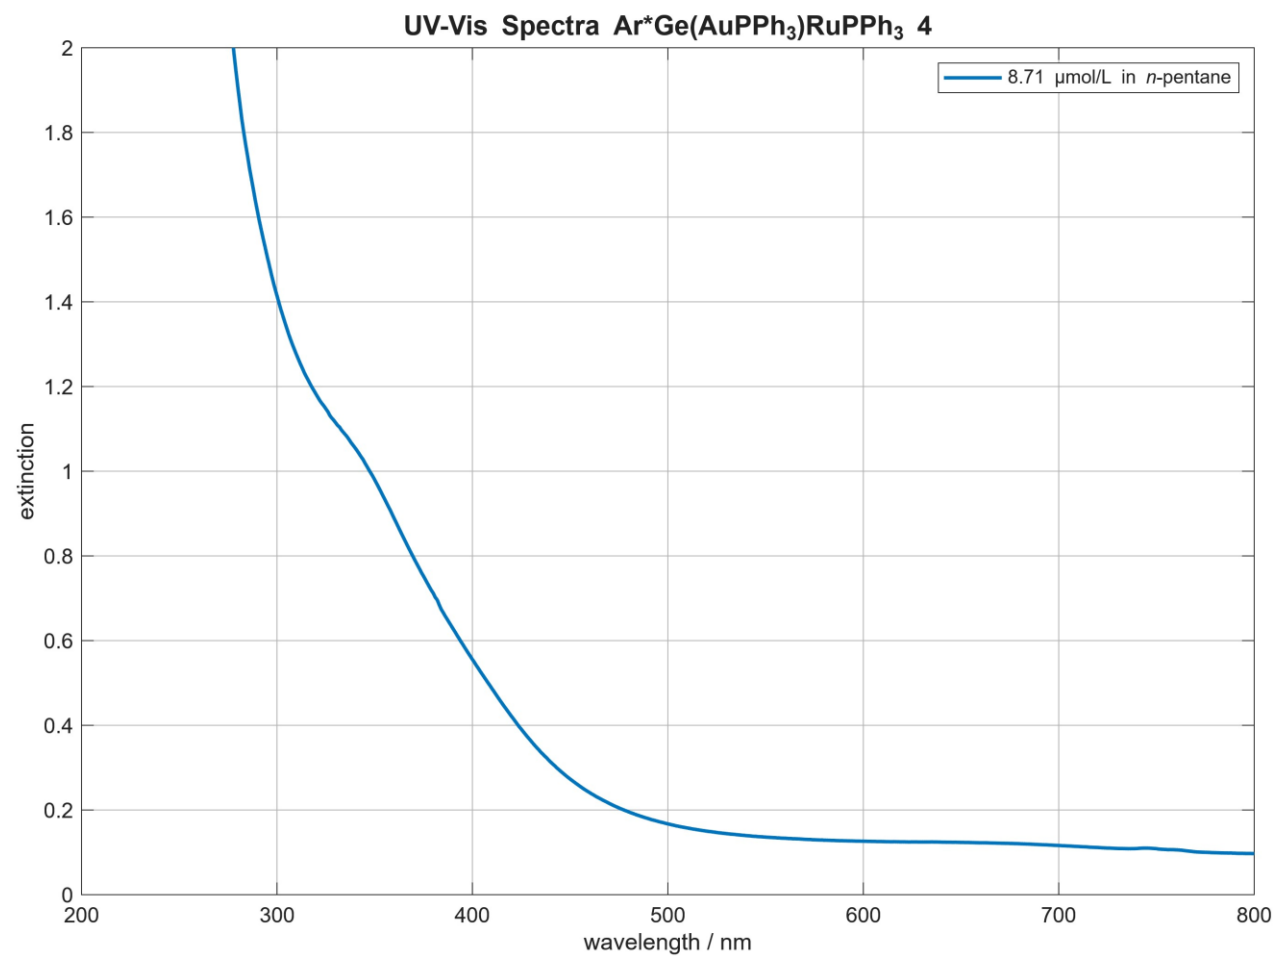

Figure SI33. UV-Vis spectrum of compound 4.

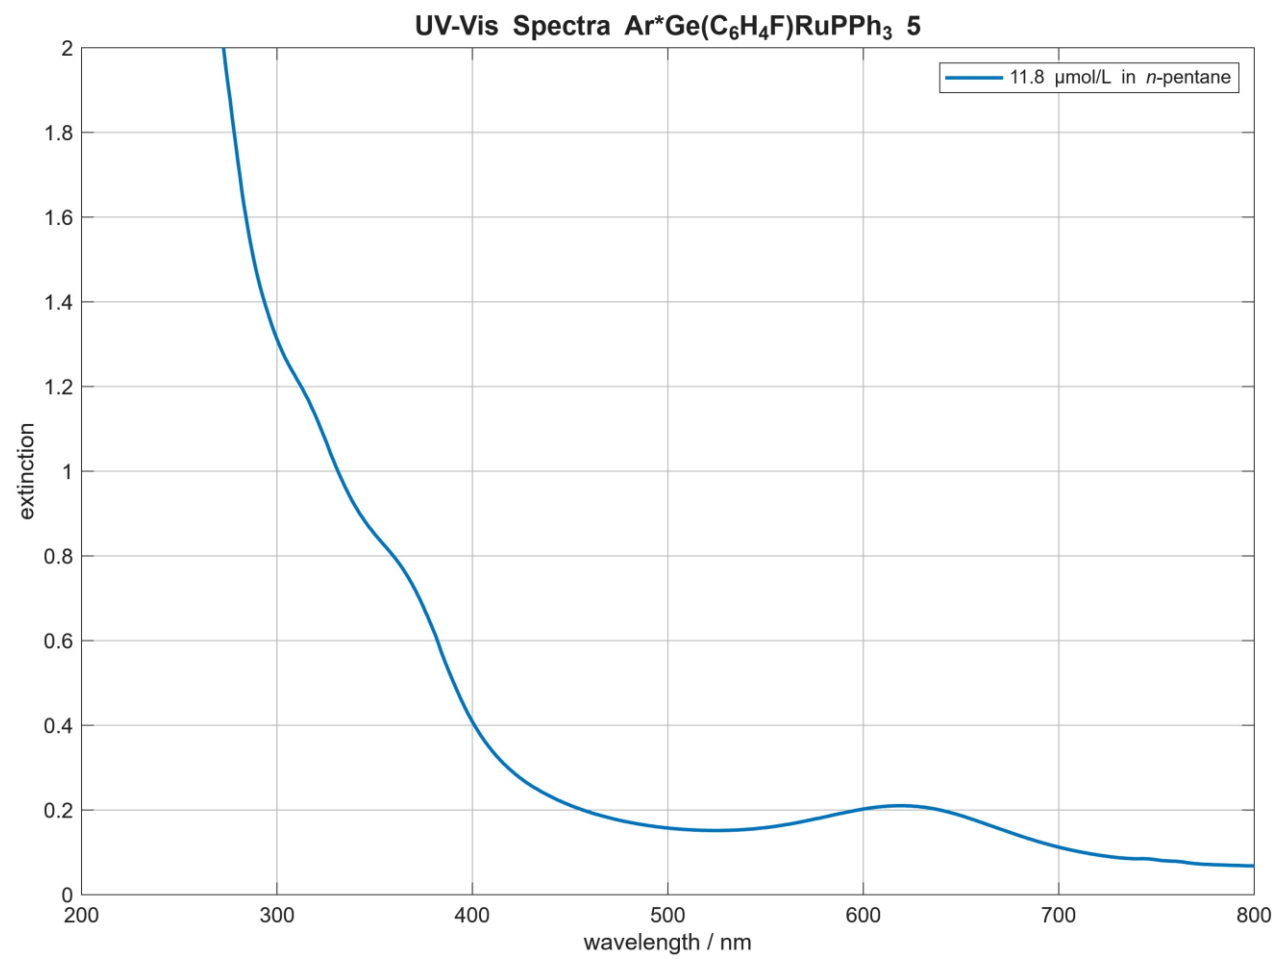

Figure SI34. UV-Vis spectrum of compound **5**.

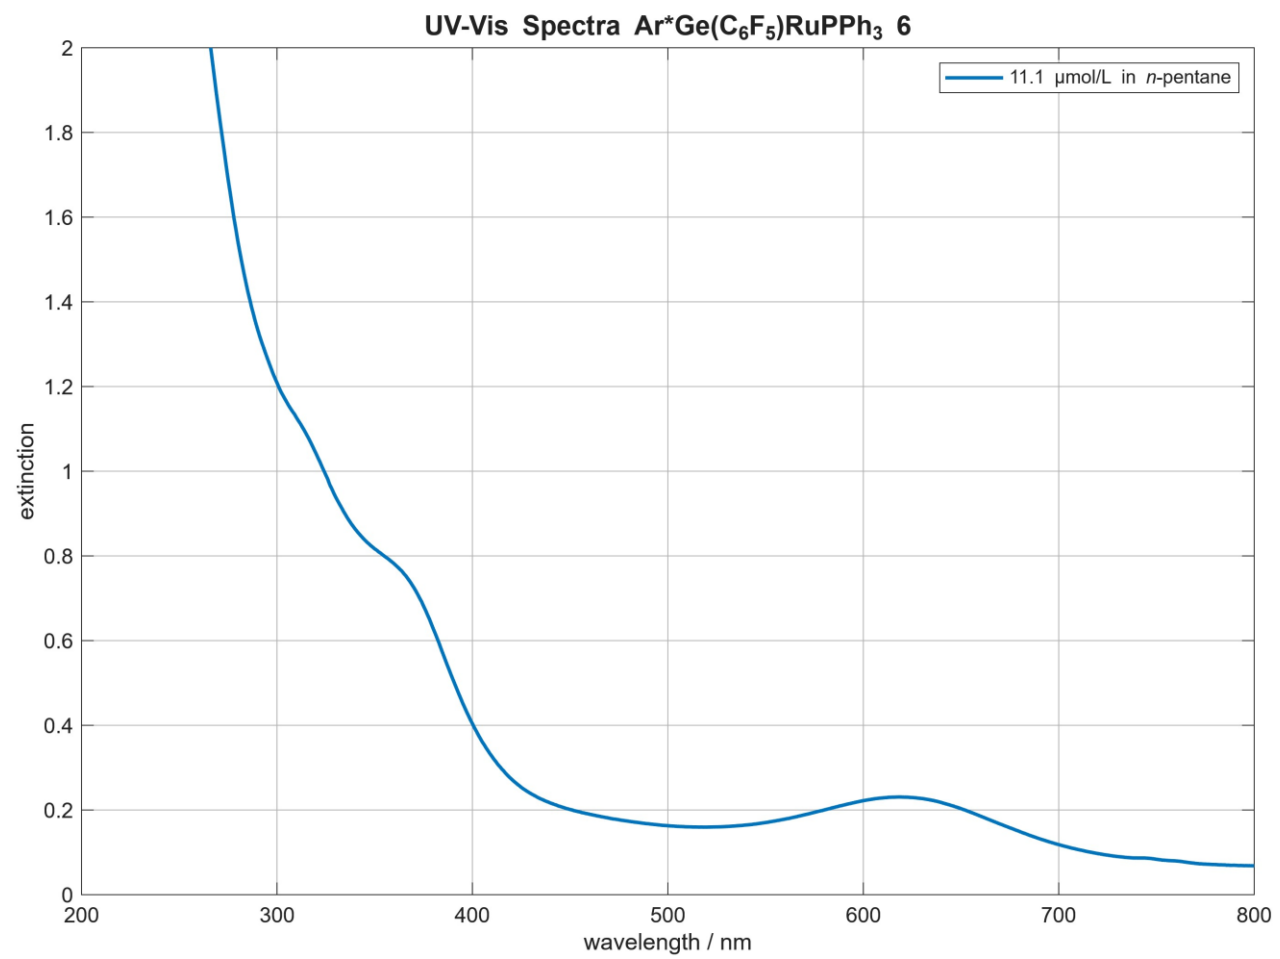

Figure SI35. UV-Vis spectrum of compound **6**.

## Quantum chemical calculations

On the basis of the molecular structures of **3a**, **3b**, **4**, **5**, and **6** determined in the solid state, the structures of the complexes were optimized using the programme Orca5.0.3<sup>11-13</sup> along with BP86,<sup>14, 15</sup> Grimme's dispersion correction and Becke-Johnson damping (D3BJ) with suitable RI approximations.<sup>16</sup> The basis sets employed were def2-TZVP for Ge, Ru as implemented in ORCA5.0.3, and def2-SVP on all other elements.<sup>17-20</sup> For all calculations, tight or very tight convergence criteria were applied for optimisations and SCF convergence, respectively. A small imaginary frequency was obtained for **4** (-9.01 cm<sup>-1</sup>). Analyses of the electronic structures were performed using NBO7, plots were generated using ChemCraft.<sup>21, 22</sup>

Table SI2. Selected results of DFT calculations and NBO analyses.

|                     | <b>2</b>    | <b>3a</b>   | <b>3b</b>   | <b>4</b>    | <b>5</b>    | <b>6</b>    |
|---------------------|-------------|-------------|-------------|-------------|-------------|-------------|
| Ru-Ge [Å]           | 2.27271     | 2.34713     | 2.38133     | 2.30474     | 2.28834     | 2.27630     |
| q [e] Ru, Ge        | -0.47, 0.96 | -0.47, 0.09 | -0.51, 0.32 | -0.43, 0.31 | -0.45, 1.00 | -0.45, 0.98 |
| Wiberg/Löwdin       | 1.01/1.80   | 1.09/1.75   | 0.99/1.88   | 1.08/1.66   | 1.07/1.79   | 1.03/1.78   |
| $\sigma$ -bond occ. | 1.8056      | 1.6821      | 1.3952      | 1.7537      | 1.7747      | 1.7780      |
| Ru-Ge% (NLMO)       | 37, 58      | 55, 37      | 71, 23      | 46, 48      | 42, 52      | 41, 54      |
| $\pi$ -bond occ.    | 1.8652      | 1.8037      | 1.7936      | 1.8470      | 1.8553      | 1.8351      |
| Ru-Ge% (NLMO)       | 71, 23      | 66, 24      | 71, 19      | 67, 26      | 69, 24      | 67, 25      |

[BP86-D3BJ, def2-SVP/TZVP(Ru, Ge, P, Cl, Au)]<sup>17, 18, 20</sup>

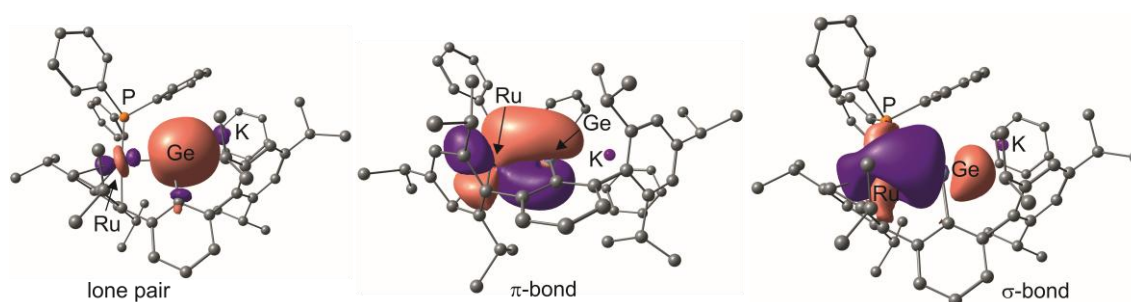

Figure SI36. NLMOs representing the Ru-Ge interactions in **3a** [lone pair: Ge 4s (78%) 4p (22%),  $\pi$ -bond: Ge 4p (100%), Ru 4d (100%),  $\sigma$ -bond: Ge 4s (16%), 4p (84%), Ru 5s(11%), 4d (89%) orbital].<sup>21</sup>

## Calculation of Excited state spectra

Excited-state spectra of **3a** and **3b** were calculated using time-dependent density functional theory (TD-DFT) with the CAM-B3LYP functional, employing the def2-TZVP basis set and the RIJCOSX approximation as implemented in ORCA.<sup>17, 18, 23</sup>

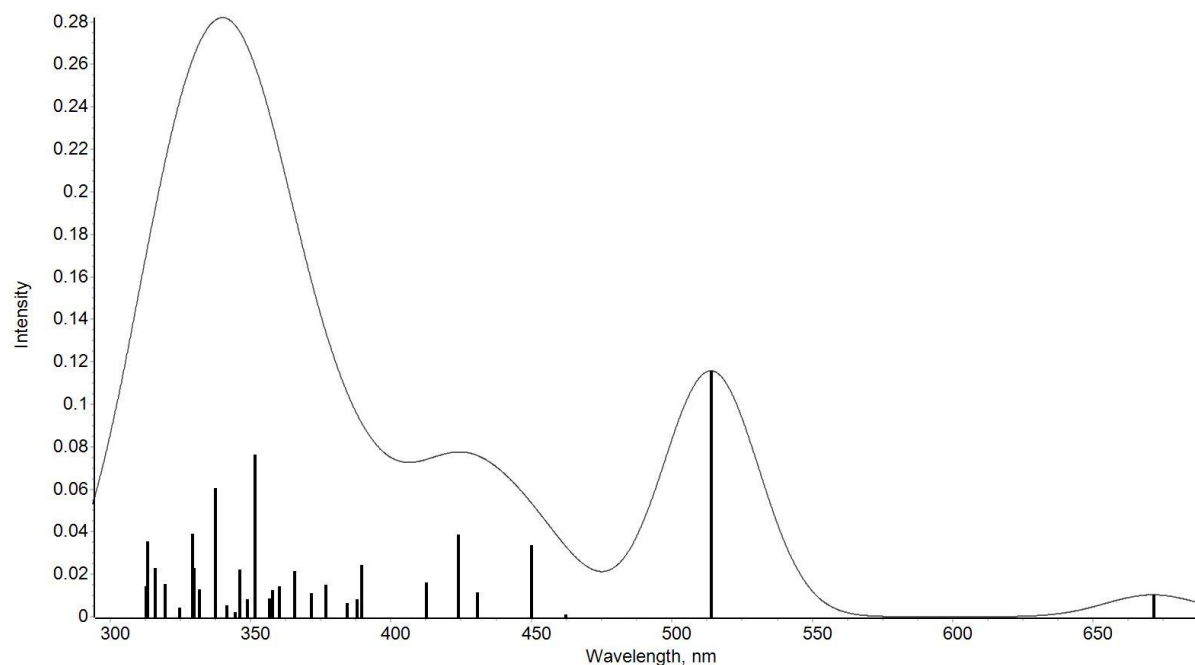

Figure SI37. Absorption spectrum computed at the TD-CAM-B3LYP/def2-TZVP level of theory of compound **3a**.

Table SI3. UV-VIS transitions (TD-CAM-B3LYP/def2TZVP) of **3a**.

| State | energy (cm <sup>-1</sup> ) | wavelength (nm) | fosc        | Relevant Transitions                                                                                                                                                                                                                                                                                                                                                                                                                                                                                                                                                                  |
|-------|----------------------------|-----------------|-------------|---------------------------------------------------------------------------------------------------------------------------------------------------------------------------------------------------------------------------------------------------------------------------------------------------------------------------------------------------------------------------------------------------------------------------------------------------------------------------------------------------------------------------------------------------------------------------------------|
| 2     | 19457.4                    | 513.9           | <b>0.12</b> | <b>HOMO → LUMO</b> (c= 0.37849838)<br><b>HOMO → LUMO<sup>+2</sup></b> (c= -0.34924516)<br><b>HOMO → LUMO<sup>+3</sup></b> (c= -0.10032208)<br><b>HOMO → LUMO<sup>+8</sup></b> (c= -0.10587851)<br><b>HOMO<sup>-1</sup> → LUMO</b> (c= 0.45022405)<br><b>HOMO<sup>-1</sup> → LUMO<sup>+2</sup></b> (c= -0.53697752)<br><b>HOMO<sup>-1</sup> → LUMO<sup>+4</sup></b> (c= 0.15339810)<br><b>HOMO<sup>-1</sup> → LUMO<sup>+9</sup></b> (c= -0.14077980)<br><b>HOMO<sup>-1</sup> → LUMO<sup>+21</sup></b> (c= -0.10352862)<br><b>HOMO<sup>-3</sup> → LUMO<sup>+3</sup></b> (c= 0.11319816) |

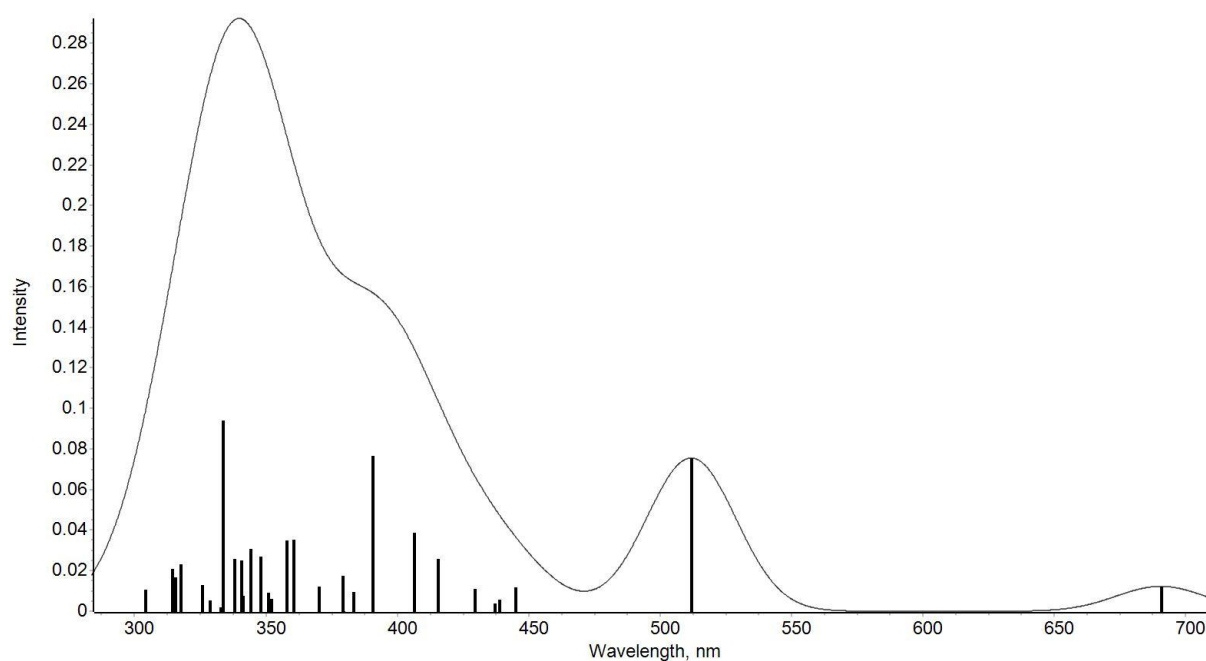

Figure SI38. Absorption spectrum computed at the TD-CAM-B3LYP/def2-TZVP level of theory of anion of compound **3b**.

Table SI4. UV-VIS transitions (TD-CAM-B3LYP/def2TZVP) of **3b**.

| State | energy (cm <sup>-1</sup> ) | wavelength (nm) | fosc        | Relevant Transitions                                                                                                                                                                                                                                                                                                                                                                                                                                                                                      |
|-------|----------------------------|-----------------|-------------|-----------------------------------------------------------------------------------------------------------------------------------------------------------------------------------------------------------------------------------------------------------------------------------------------------------------------------------------------------------------------------------------------------------------------------------------------------------------------------------------------------------|
| 2     | 19535.6                    | 511.9           | <b>0.08</b> | <b>HOMO</b> → <b>LUMO</b> <sup>+4</sup> (c= -0.11420294)<br><b>HOMO</b> <sup>-1</sup> → <b>LUMO</b> (c= -0.70716904)<br><br><b>HOMO</b> <sup>-1</sup> → <b>LUMO</b> <sup>+1</sup> (c= -0.55456321)<br><b>HOMO</b> <sup>-1</sup> → <b>LUMO</b> <sup>+3</sup> (c= -0.11345047)<br><b>HOMO</b> <sup>-1</sup> → <b>LUMO</b> <sup>+5</sup> (c= -0.10180811)<br><b>HOMO</b> <sup>-1</sup> → <b>LUMO</b> <sup>+8</sup> (c= 0.10280356)<br><b>HOMO</b> <sup>-1</sup> → <b>LUMO</b> <sup>+17</sup> (c= 0.12787509) |

## Coordinates of optimized structures

## Compound 2.

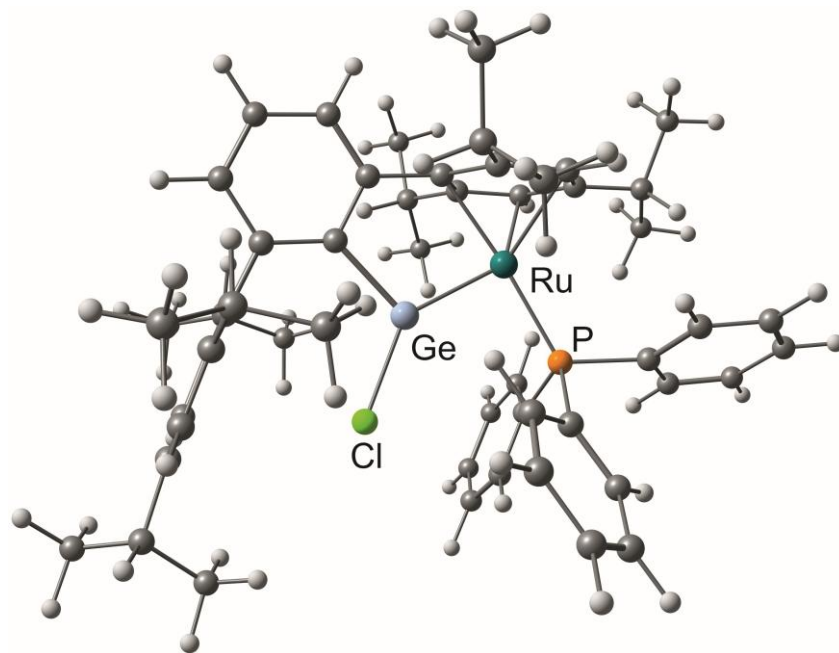

Figure SI39. Optimized structure of 2.

122  
 Coordinates from ORCA-job bp86optfreq\_hnumac E -5069.263510708493  
 Ru 5.63793423910771 4.61351217296473 13.83545467280400  
 Ge 5.19555914244482 6.54737155608290 13.03125205030311  
 Cl 5.82744711285755 8.54323819393936 12.44074987537076  
 C 3.56353026622735 5.47815700832933 13.87089245276632  
 H 8.49748833000432 6.34750469234435 13.08349278970066  
 O 9.52229395749364 7.25910457532677 12.74943303043546  
 N 10.87070293927798 6.85994250830591 12.86961441265743  
 S 11.66214631261994 7.5793950387863 12.60857769464669  
 F 11.19900976790167 5.56907139612616 13.30520475992163  
 Br 12.25391780109285 5.26669665135691 13.38939354480566  
 I 10.1802770030892 6.6587803826500 13.63494101192265  
 Ba 10.430654038686666 3.64171212332066 13.97348219297527  
 La 8.83175847788884 5.04045191563517 13.53710156207095  
 Ce 9.15778919352959 8.5251236089796 12.7303002473852  
 Pr 8.89391078239281 8.83343987385664 10.8966689831332  
 Nd 8.42292755835472 10.09022023796394 10.48480592129498  
 Pm 1.924639872234 10.25043375663836 9.42038169862765  
 Sm 8.21397599465014 11.13819515710817 11.39736236528104  
 Eu 8.52289574409727 10.91568519044076 12.74892873355807  
 Gd 8.36878391854462 11.73807684731257 13.46483003863442  
 Tb 8.9328685360445 9.67433456276367 13.21017461065376  
 Dy 9.06076085054242 7.70208085056942 9.88483849395881  
 Ho 6.998296326969 6.927225969 10.360769189321  
 Er 7.70955032494137 7.03920781573366 9.55667256045121  
 Tm 7.83458684430349 6.22952490280854 8.80838155983735  
 Yb 6.98443438391435 7.7716504330591 9.1569837616382  
 Lu 7.24609099900340 6.58875339719531 10.45894005093801  
 Sc 9.77812850971585 8.15979091465390 8.6031732396094  
 Ti 9.98637748369758 7.29231379845890 9.843655729970  
 V 10.74143817857528 8.65704748532247 8.83593553164906  
 Cr 9.16284642539666 8.87466630689498 8.01839981317191  
 Mn 7.51784601260895 12.4642018392076 10.961555608986  
 Fe 7.66790303130059 13.15352042562037 11.81837166041883  
 Co 6.13185104524414 12.28577303638475 10.57771513752579  
 Ni 6.9659889608415 13.2569483845458 10.30831816824245  
 Cu 5.56224852163265 11.84516512066766 11.42022061129413  
 Zn 6.01969837062290 11.60216750325590 9.71031836377746  
 Ga 6.4118863263683 13.1075619014232 9.786749757547  
 Ge 7.99236560723543 14.10051359933991 9.53255119935785  
 As 8.37752055011884 12.48084283333792 8.88091687398025  
 Se 9.4777343208386 10.0695497685885 10.0695497685885  
 Br 9.25614789614444 9.44275534029241 14.69701689206697  
 Kr 9.97737232831285 8.60175281481157 14.77289176152708  
 Rb 9.97207589748759 10.00417459812079 15.2298929406062  
 Sr 8.15949130564615 8.87344645923078 16.51569605770246  
 Y 7.58408034891136 8.03790251015487 15.03834417194514  
 Zr 7.16313634974466 7.8509813163926 15.28669693202852  
 Nb 9.8938859020989 10.65743459603905 15.39082974362477  
 Mo 10.19369714777256 10.39836450474058 16.4269996382878  
 Tc 9.18915433064163 11.51103647713784 15.46137538513391  
 Ru 10.79448909541007 11.00819953622315 14.84751868769242  
 Rh 7.7434807707910 4.06611175777809 13.8968738666541  
 Pd 7.2189507968866 4.0347470450582 16.607951445036  
 Ag 6.10097177831989 3.17902120829942 15.52215697504640  
 Cd 5.67916823599902 3.14239997649838 16.53628145047532  
 In 5.4796161120934 2.40049246513428 14.49148208324474  
 Sn 5.99658862069737 2.46203108379164 13.16270589804310  
 Sb 5.52170253875079 1.87374722868085 12.36871460872889  
 Te 7.11610459661719 4.83468913945837 16.36320789578159  
 Bi 7.88434472705314 4.83468913945837 16.36320789578159  
 Po 8.39616865565409 5.68787123914887 15.87104864061972  
 At 8.8351208353205 5.41291447812103 17.3719706059202  
 Rn 7.39208963698070 6.11576411331361 18.06157822950012  
 Fr 6.41859929796296 4.62226322135049 17.99683848423480  
 Ra 6.072098994994 3.93493876377711 17.99683848423480  
 Ac 8.95925281483374 3.97614136607265 17.05569572633488  
 Th 4.8869116851491 4.55836724321792 17.83765984547161  
 Pa 7.144665982920 1.6131040246975 16.8316935196887  
 U 8.50070239244499 3.08854648737316 17.5402055438701  
 Np 4.31610025210952 1.49018889450591 14.85042864848785  
 Pu 7.7123565917490 2.0375103450552 15.607951445036  
 Am 4.85789987916115 2.0374466881578 15.50623003084850  
 Cm 4.02541708718227 -0.45123747159037 15.8362651383864  
 Bk 4.48745401782629 0.431535307288 16.3890498696941  
 Cf 5.48151766658097 -0.36982423186474 14.78876883817375  
 Es 3.9055947370310 1.1669286927945 13.67211553078887  
 Fm 2.476121265541 0.6551918329896 14.03188935615382  
 Md 3.87958383364573 0.49517565559617 12.93587741619716  
 No 3.07354443508346 2.08896727597324 13.14823842960735  
 Lr 7.69290528444455 3.3375103450552 11.934511603892  
 Rf 8.2562687007865 4.26364810597258 11.32760133287910  
 Ta 6.5646574812250 3.38247532723517 10.34937167790216  
 W 7.01392710771963 3.5193732592640 9.3452322289218  
 Re 5.87183572623294 4.22467366636731 10.5458010695573  
 Os 9.9696913883867 2.44772940559296 10.31551143607320  
 Ir 8.6240037890893 1.4578909014925 11.035702424122  
 Pt 9.08028772951389 2.17975112833204 10.19988501108941  
 Au 8.08791343789487 1.17871409879796 11.31219349466243  
 Hg 4.4498049211694 4.470785077961 11.9563277892957  
 Tl 2.1036428429885 4.42046927730862 14.52261148159181  
 Pb 2.29598995311299 4.06568790360262 15.88625935795196  
 Bi 3.13734937734857 4.447048077961 16.8636129348577  
 Po 1.32254360901572 3.24563129391762 16.47223083170408  
 At 1.39783010116773 2.98020659939783 17.53806787901804  
 Rn 0.25296138530849 2.76034720447918 16.63779010244327

|   |                   |                   |                   |
|---|-------------------|-------------------|-------------------|
| H | -0.50980090974906 | 2.11131168923313  | 16.15449615694160 |
| H | 0.15762582752177  | 3.11594237218845  | 14.34329733253375 |
| H | -0.68285345973937 | 2.74843344876618  | 13.73446222989038 |
| H | 1.12754493718549  | 3.94823831759358  | 13.75834668969310 |
| H | 1.03976746765959  | 4.23334650648397  | 12.70000311383804 |
| H | 2.99043797984785  | 5.92358294338608  | 12.18579475487183 |
| H | 3.07136285264706  | 4.91651421960950  | 11.19825721341955 |
| H | 3.42508356130844  | 5.91437316279399  | 11.48623519485353 |
| H | 2.74800605212823  | 5.19651642093261  | 9.86528646053124  |
| H | 2.80854550430064  | 4.39998057371594  | 9.10777933159441  |
| H | 2.37385915025319  | 6.50162985875661  | 9.49269057604937  |
| H | 2.14195639563700  | 6.7065607232679   | 8.44120262185848  |
| H | 2.31233835614171  | 7.51092537994783  | 10.46435724933246 |
| H | 2.03784900048684  | 8.53767804454987  | 10.17763212993085 |
| H | 2.60919302986330  | 7.22362838332110  | 11.80810169836048 |
| H | 2.569560538910    | 8.02429837342434  | 12.55872980600046 |
| H | 3.20316051393808  | 6.99689475110480  | 14.85425887916152 |
| H | 1.87216209437426  | 7.43906278205661  | 15.01434247560105 |
| H | 1.04835187100816  | 6.87038437219289  | 14.55714782307159 |
| H | 1.59401731019494  | 8.59636841877094  | 15.75487200177056 |
| H | 0.55282456744304  | 8.93523086606050  | 15.87002296689526 |
| H | 2.64163923150791  | 9.31985866113505  | 16.35350489418338 |
| H | 4.2129644732986   | 10.22672877000120 | 16.83765284408181 |
| H | 3.96563572433662  | 8.87762753045809  | 16.20947457240239 |
| H | 4.79240268684959  | 9.43245017220731  | 16.67841939262328 |
| H | 4.24004859868917  | 7.72054803016510  | 15.96401041566187 |
| H | 5.27164447363468  | 7.35564022541614  | 15.34712536859867 |

## Compound 3a.

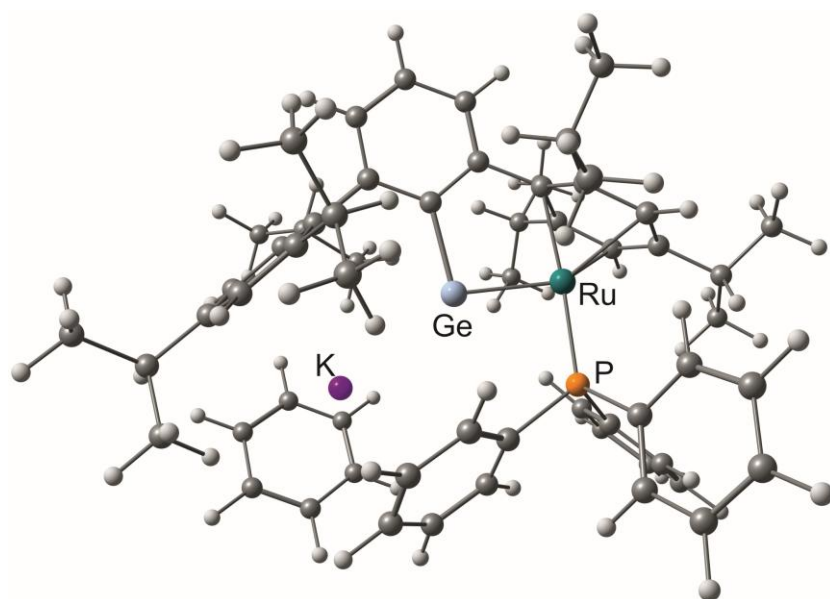

Figure SI40. Optimized structure of 3a.

134  
Coordinates from ORCA-job bp86optfreq\_hnumac E -5441.084698086705

|    |                   |                   |                   |
|----|-------------------|-------------------|-------------------|
| C  | 11.05300925325856 | 5.0718715969851   | 7.4785532954454   |
| C  | 9.71192513452261  | 4.72536643581687  | 7.72253128185195  |
| H  | 9.04771008630187  | 5.43311705387211  | 8.23937530675321  |
| C  | 9.22189977084847  | 3.47556137324460  | 7.30031581165559  |
| H  | 8.17539060368102  | 3.20016328126834  | 7.49568954016436  |
| C  | 10.06800876238860 | 2.57741265638714  | 6.6263703261706   |
| H  | 9.6848126243777   | 1.59893663103416  | 6.30060984921108  |
| C  | 11.40777679538331 | 2.92699271977374  | 6.37707754097329  |
| H  | 12.07139281462997 | 2.22413584677678  | 5.8521793055807   |
| C  | 11.90071125444092 | 4.17038170055964  | 6.80828245935506  |
| H  | 12.94918833025286 | 4.44107659068910  | 6.61765548338440  |
| Ge | 9.60719865914719  | 8.29184330812574  | 3.43055519937414  |
| K  | 9.6860083941533   | 5.31411307263086  | 4.47647087635077  |
| P  | 9.62650188175496  | 9.51620189461836  | 4.70633228069530  |
| C  | 11.25281013231997 | 8.84619663912840  | 2.33327213032681  |
| C  | 11.49654959278775 | 10.22824437757641 | 2.13736981893124  |
| C  | 12.60309475946369 | 10.66985623528308 | 1.39103188254145  |
| H  | 12.78344050740740 | 11.74918256292208 | 1.26265557428445  |
| C  | 13.46648373361772 | 9.73111084641264  | 0.78743692933137  |
| H  | 14.32351087706134 | 10.07286893301973 | 0.19685084483716  |
| C  | 13.22955127721436 | 8.35680205346235  | 0.96213407602615  |
| H  | 13.89760118495557 | 7.61994393485631  | 0.48636587539088  |
| C  | 12.13631499454634 | 7.91370730431464  | 1.73705898190588  |
| C  | 10.51086202901649 | 11.18210967241074 | 2.74121483222894  |
| H  | 10.61482038557655 | 11.5234569404374  | 4.14363250285442  |
| C  | 9.5770992382012   | 12.31691839813752 | 4.74568786392884  |
| H  | 9.65255795703102  | 12.56477113098983 | 5.81195397125634  |
| C  | 8.46436534231659  | 12.79033069613083 | 3.99063062895760  |
| Ru | 8.73641398674608  | 10.44404314418064 | 3.77521827718166  |
| C  | 8.35457797770512  | 12.39343665579070 | 2.62195093681721  |
| H  | 7.48422692909426  | 12.73208986286334 | 2.03869094273681  |
| C  | 9.33165665629154  | 11.55827413401827 | 1.98461165614399  |
| C  | 11.85211703792709 | 11.13859792232950 | 4.94619667758180  |
| H  | 12.38556032659520 | 10.36688561746178 | 4.35488276115229  |
| C  | 12.78508670562011 | 12.35778506448260 | 5.06994715860613  |
| H  | 13.72982689779875 | 12.08942677918305 | 5.58715426323127  |
| H  | 13.04413592085266 | 12.76210637650469 | 4.07059378457194  |
| H  | 12.29948865091239 | 13.17365258503408 | 5.64600139671200  |
| C  | 11.52679014933141 | 10.51755751556934 | 6.31029531330327  |
| H  | 12.45791413731743 | 10.21708865303358 | 6.83395894677736  |
| H  | 10.98351371715022 | 11.22224461019402 | 6.97393165937416  |
| H  | 10.88678385571250 | 9.62331307575834  | 6.16788041684900  |
| H  | 7.3650662692695   | 13.65083202977469 | 4.6029519390089   |
| H  | 6.39776656593439  | 13.21085390729759 | 4.27157495371130  |
| C  | 7.44535399794396  | 15.08605123547606 | 4.04407932732111  |
| H  | 8.39995714374797  | 15.56671288575264 | 4.34516576843656  |
| H  | 7.40103579671539  | 15.09747414002991 | 2.93642178317130  |
| H  | 6.61142566298067  | 15.71046179532908 | 4.42760708893373  |
| C  | 7.39393066300249  | 13.6604171137668  | 1.1351800247656   |
| H  | 8.26167831498504  | 14.17465306537108 | 6.53864455954183  |
| H  | 6.47594370531056  | 14.20323678775443 | 6.51726862800633  |
| H  | 7.33827102585453  | 12.63538970402190 | 6.55011490780315  |
| C  | 9.18642331009055  | 11.16647344969628 | 0.51986946797839  |
| H  | 9.87520461857656  | 10.31172981594475 | 0.35816648664821  |
| C  | 7.77247524390775  | 10.68399705764086 | 0.16982255749844  |
| H  | 7.02234397963635  | 11.49998681247889 | 0.23195468087395  |
| H  | 7.74078284336319  | 10.29056733680027 | -0.86742742029138 |
| H  | 7.46348370128621  | 9.88507530801614  | 0.8737848923116   |
| C  | 9.64929333195810  | 12.31982698752993 | -0.38875351775415 |
| H  | 10.63207639020623 | 12.61642456371764 | -0.15731204682436 |
| H  | 9.60521293578790  | 12.0286136534266  | -1.45923857847667 |
| H  | 9.00678022496953  | 13.21523800202868 | -0.25077349869762 |
| C  | 11.87975995416145 | 6.45275987800202  | 1.94293612899304  |
| C  | 10.80481083849314 | 5.82213409283332  | 1.25618506806571  |
| C  | 10.55618927007447 | 4.46545958996057  | 1.48082463731954  |
| H  | 9.72998642692600  | 3.97173173101010  | 0.93961372208759  |
| C  | 11.33476628079605 | 3.69286512463591  | 2.37435891773253  |
| C  | 12.38596011874141 | 4.33873349522589  | 3.05151158561865  |
| H  | 13.00158646841762 | 3.74949641045020  | 3.74713831689900  |
| C  | 12.67303854454630 | 5.70671640415818  | 2.85509465712242  |
| C  | 9.96951250270436  | 6.60392847521794  | 0.24890526071246  |
| H  | 10.06676548851314 | 7.66666518176014  | 0.56217331374746  |
| C  | 10.68970095461319 | 6.51473018150210  | -1.14917883420352 |
| H  | 11.65147042140657 | 6.89261273178453  | -1.13350859161446 |
| H  | 10.63164667485620 | 5.46506531620493  | -1.51199547510181 |
| H  | 10.03757852865825 | 7.12022374116434  | -1.88276000766021 |
| C  | 8.49157228662434  | 6.19441919516407  | 0.23518643450636  |
| H  | 7.90739031714315  | 6.88910314749226  | -0.40110386061175 |
| H  | 8.33422681014009  | 6.17088539441109  | -0.16645272181679 |
| H  | 8.07312644430029  | 6.24242334909006  | 1.26073763100376  |
| C  | 11.06977643925704 | 2.20536577171939  | 2.57354605315855  |
| H  | 11.70941363623175 | 1.87469283237720  | 3.42153783087085  |
| H  | 11.49275390547182 | 1.40109948609663  | 1.32896933870497  |
| H  | 11.35949865777732 | 0.31125136289883  | 1.48087839606644  |
| H  | 10.88442119346998 | 1.69059525802922  | 0.44704494353070  |

|   |                   |                   |                   |
|---|-------------------|-------------------|-------------------|
| H | 12.55567558018861 | 1.58745349341696  | 1.07712845803439  |
| C | 9.6058319232881   | 1.91320389246572  | 2.95021576281252  |
| H | 9.3060064607544   | 2.44193463912924  | 3.87909538892661  |
| H | 8.90814190416773  | 2.22334173460726  | 2.14542108301643  |
| H | 9.44786036483726  | 0.82911293513562  | 3.12419293421779  |
| C | 13.75673196223868 | 6.41157457794826  | 3.66888933120723  |
| H | 14.2201601024701  | 7.16194976586790  | 2.99620607688778  |
| C | 14.87249504397985 | 5.48230354201004  | 4.16389531925578  |
| H | 14.50911042873046 | 4.76139244828265  | 4.92693237336311  |
| H | 15.31842219635437 | 4.89576245952307  | 3.33511297713045  |
| H | 15.68132221006314 | 6.07265869702756  | 4.63977759088894  |
| C | 13.12448762672190 | 7.19894663791740  | 4.83466868107107  |
| H | 13.89074570154122 | 7.78655282855619  | 5.38034538624905  |
| H | 12.34655651392484 | 7.90048797242392  | 4.47325319728122  |
| H | 12.64411115320490 | 6.51153486084614  | 5.55986495595112  |
| C | 6.76993830899123  | 7.68598487723031  | 4.87506410741674  |
| C | 6.67916289265614  | 6.93589752293838  | 3.67566162771976  |
| H | 6.64922268604091  | 7.47186699132440  | 2.71605053802192  |
| C | 6.55748907766696  | 5.53515168457441  | 3.70973292799565  |
| H | 6.43412780742834  | 4.97354273044756  | 2.76796652674576  |
| C | 6.55826379334431  | 4.85472981173935  | 4.94198644417552  |
| H | 6.44194224524267  | 3.75977834733155  | 4.97243232661569  |
| C | 6.68301679826731  | 5.59109621800602  | 6.13641398316341  |
| H | 6.65352924491218  | 5.07473563202836  | 7.10761535493284  |
| C | 6.79024323872263  | 6.99485345184984  | 6.09976372823771  |
| H | 6.86426685335648  | 7.56104133126141  | 7.03981921424149  |
| C | 6.65344949310683  | 10.05535725048995 | 6.45548129607716  |
| C | 7.79110033978742  | 10.03970394631416 | 7.29254837781710  |
| H | 8.74529012264899  | 9.69539548678079  | 6.86418410991053  |
| C | 7.71655206002713  | 10.49813529090219 | 8.61431389755669  |
| H | 8.61340520145907  | 10.47700960461232 | 9.25325122519721  |
| C | 6.50545035425489  | 11.01392654398229 | 9.11282977810608  |
| H | 6.44909261156064  | 11.39916199673609 | 10.14270539581695 |
| C | 5.37403683465559  | 11.04844505040423 | 8.28343429980498  |
| H | 4.42611299574360  | 11.46216266523032 | 8.66179661513829  |
| C | 5.44312665185616  | 10.56250398672131 | 6.96547161494668  |
| H | 4.55040603584776  | 10.59848499429445 | 6.32522294271295  |
| C | 5.25680370244817  | 9.83410690310709  | 3.96763178488618  |
| C | 4.11596190210686  | 9.07513605224398  | 4.30534219217737  |
| H | 4.20201799422722  | 8.25533537729160  | 5.03465327892537  |
| C | 3.88875389005395  | 11.16008919725152 | 2.43879779678655  |
| H | 3.80676233191325  | 11.97477440049801 | 1.70243472053625  |
| C | 5.13060240791817  | 10.86853866742945 | 3.02480552175002  |
| H | 6.04045396054649  | 11.41967335680610 | 2.74686497030279  |
| C | 2.87432476749663  | 9.35626103965564  | 3.71429773177754  |
| H | 1.99148266746944  | 8.75415426330409  | 3.98100009568155  |
| C | 2.75676205635097  | 10.40215071911804 | 2.78173660769695  |
| H | 1.78256249834926  | 10.61985625349119 | 2.31692006635730  |
| H | 11.43709001967576 | 6.04904411308775  | 7.80759635562625  |

Compound **3b**.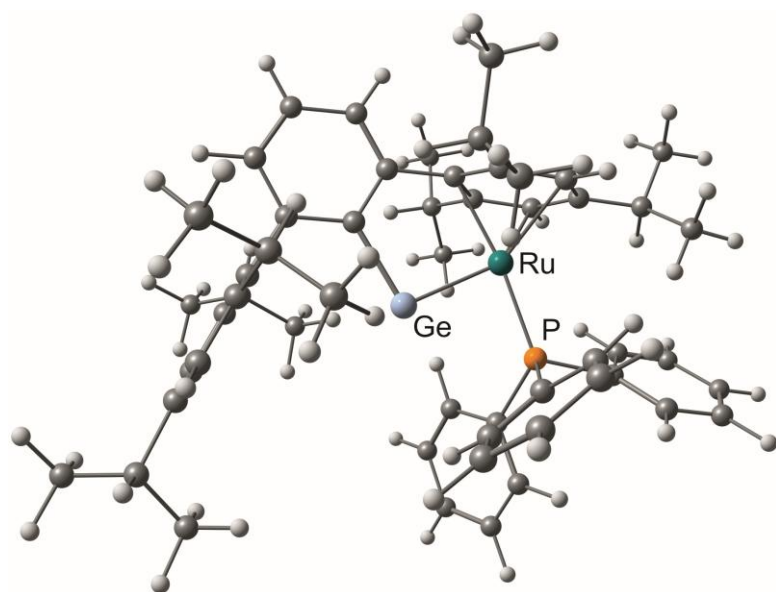Figure SI41. Optimized structure of **3b**.

121  
Coordinates from ORCA-job bp86optfreq\_hnumac E -4608.980404669230

|    |                    |                   |                   |
|----|--------------------|-------------------|-------------------|
| Ge | 8.00706436994255   | 10.31575954460087 | 14.65144526310092 |
| P  | 9.23483365690400   | 7.62225002691244  | 13.90669165483991 |
| C  | 5.27366053402061   | 10.97065272735291 | 13.54008404403383 |
| C  | 4.11661373483372   | 11.73041649699659 | 13.29014561555395 |
| H  | 3.31562240568905   | 11.31495641378525 | 12.65632929260379 |
| C  | 7.28901791724815   | 13.19699014809554 | 17.11278063376538 |
| C  | 8.39075595063139   | 13.64569142626541 | 17.85910416962596 |
| H  | 8.38172185598910   | 13.51754413747928 | 18.95336212670054 |
| C  | 9.51654116970397   | 14.22301568059035 | 17.24451022893525 |
| C  | 9.51494962522572   | 14.35035425080285 | 15.84723402722095 |
| H  | 10.400644827926912 | 14.78553809027687 | 15.35449110656670 |
| C  | 8.43660014021202   | 13.90775923287367 | 15.06022627423402 |
| C  | 6.14013141170431   | 12.46196789738451 | 17.79711075454188 |
| H  | 5.28087216429457   | 12.48066965384306 | 17.09573901800849 |
| C  | 6.51639624762531   | 10.98307321773359 | 18.01411723725353 |
| H  | 5.658977854093751  | 10.40397649121372 | 18.41731654679996 |
| H  | 7.36791647346887   | 10.89078876667084 | 18.72102007174018 |
| H  | 6.83853056004538   | 10.51440529963205 | 17.05922703307450 |
| C  | 5.68530358349787   | 13.12656277969335 | 19.10591330676483 |
| H  | 4.78975163814925   | 12.61227280030633 | 19.51360280161305 |
| H  | 5.42961613697071   | 14.19516808346228 | 18.95065627305013 |
| H  | 6.470981890277990  | 13.0787910253587  | 19.88969763100364 |
| C  | 7.31169018354375   | 13.33214666473773 | 15.70035447687948 |
| Ru | 7.25790858178597   | 8.45916726773439  | 13.36204266153663 |
| C  | 6.32532893586144   | 11.48053352847174 | 14.34170810863910 |
| C  | 6.18767081527066   | 12.78381698658674 | 14.87781959002463 |
| C  | 5.02632888929999   | 13.54637635177059 | 14.62893729348324 |
| C  | 4.94097744697909   | 14.559680010015   | 15.05564900066266 |
| C  | 8.51697649443875   | 14.00835754763316 | 13.54000803394922 |
| H  | 7.57391527691034   | 13.58653250945631 | 13.13753164068538 |
| C  | 9.67009515321961   | 13.15462523287479 | 12.98298245156648 |
| H  | 9.6586559774010    | 13.14257716924123 | 11.8735695572422  |
| H  | 9.5892831484888    | 12.10477541060910 | 13.34043866315278 |
| H  | 10.65017605711745  | 13.53805284777168 | 13.30292892901064 |
| C  | 8.60342849013032   | 15.47178066854132 | 13.07229210232461 |
| H  | 8.61256600518805   | 15.53171693267611 | 11.96319840877758 |
| H  | 9.52969442232440   | 15.96267284858551 | 13.44072829662421 |
| H  | 7.74046702229059   | 16.06266540377417 | 13.44298651359113 |
| C  | 5.47130367728911   | 9.61281615976818  | 12.94239730564641 |
| C  | 6.25100451963035   | 9.49440772399395  | 11.72279554222300 |
| C  | 6.51131298943009   | 8.18306818828426  | 11.20073109499901 |
| H  | 7.08541710465995   | 8.08868137286258  | 10.26953021026189 |
| C  | 6.0541112991620    | 7.00623922005219  | 11.86403455114436 |
| C  | 5.36712939745959   | 7.14100971633874  | 13.10877853115464 |
| H  | 5.05576422761097   | 6.22909442631664  | 13.64098562702751 |
| H  | 5.079019222372     | 4.42634177109838  | 13.67939729653141 |
| C  | 6.68777051408752   | 10.73532033574475 | 10.95242461874800 |
| H  | 6.67336969796006   | 11.57557858637223 | 11.67629493546407 |
| C  | 5.66962497228024   | 11.05654133587622 | 9.84291653978516  |
| H  | 5.94280634376520   | 11.98727341404723 | 9.30125664018268  |
| H  | 4.65319057408041   | 11.19159400807470 | 10.26541245777130 |
| H  | 5.6195949638156    | 10.23017897914770 | 9.10142806517832  |
| C  | 8.11976559906918   | 10.62924929033963 | 10.41520275034714 |
| H  | 8.43793709284560   | 11.58838232883959 | 9.95578402352810  |
| H  | 8.21924409275409   | 9.84314141017778  | 9.63663774753854  |
| H  | 8.81616953262214   | 10.37741120037542 | 11.23873015076633 |
| C  | 6.29589027406595   | 5.6187276263013   | 11.28770094792811 |
| H  | 6.40057438596332   | 4.9288608963404   | 12.15280510145440 |
| C  | 5.06748649408405   | 5.16281952417683  | 10.4732187524909  |
| H  | 5.19323509339135   | 4.12479658928737  | 10.09523392837570 |
| H  | 4.91258420536242   | 5.83027282028669  | 9.59888458811588  |
| H  | 4.14420712771728   | 5.19988492128854  | 11.08667575258099 |
| H  | 7.5819364280240    | 5.50397462643379  | 14.68855463496062 |
| H  | 7.78333626228897   | 4.44604722384932  | 10.19404479437476 |
| H  | 8.45171375359947   | 5.88392165935023  | 11.02817456148363 |
| H  | 7.50985949320765   | 6.07700886131649  | 9.51086088934417  |
| C  | 4.28763826381929   | 8.55373521383319  | 14.97525124207537 |
| H  | 4.51356678795704   | 9.56327757132548  | 15.37709172798890 |
| C  | 2.77581124515126   | 8.4884918594293   | 16.16418708273970 |
| H  | 2.18083081062449   | 8.62698120240799  | 15.61688792455803 |
| H  | 2.50161188911951   | 7.50566912370588  | 14.24823615677679 |
| H  | 2.47433751438959   | 9.27551936483425  | 13.96843989700470 |
| C  | 4.71069836562344   | 7.53206746390586  | 16.03812594810728 |
| H  | 4.22652013946911   | 7.75419336474069  | 17.01197409406715 |
| H  | 5.8113186505321    | 7.55910761808785  | 16.16418708273970 |
| H  | 4.42884833001099   | 6.49530298296462  | 15.75736124997296 |
| C  | 9.60023842371957   | 5.87169579831560  | 13.41687455881958 |
| H  | 10.74412873710598  | 5.42309127838225  | 12.72794319536910 |
| C  | 11.53438840992055  | 6.14046378402276  | 12.46134204120937 |
| C  | 10.87594801519615  | 4.0702828463989   | 12.36801583249948 |
| H  | 11.76844127974725  | 3.73750765820090  | 11.81357256217657 |
| C  | 9.87908517104306   | 3.14398567400532  | 12.77448782837152 |
| H  | 9.98312858901349   | 2.08470290139468  | 12.4303752147260  |
| C  | 8.74640689503866   | 3.57890443701760  | 13.42757347121305 |
| H  | 7.96143908774974   | 2.85874484995756  | 13.70912246550250 |

|   |                   |                   |                    |
|---|-------------------|-------------------|--------------------|
| C | 8.60730804580949  | 4.93143050757732  | 13.76540160620555  |
| H | 7.70892558745181  | 5.29884824300566  | 14.28846545177413  |
| C | 9.83360811272075  | 7.47258568737285  | 15.66335162260602  |
| C | 11.12320469433772 | 6.98949497276049  | 15.96267220746959  |
| H | 11.81047211111786 | 6.73046137856830  | 15.14249308476584  |
| C | 11.53739763993314 | 6.83866309193874  | 17.29530914233345  |
| H | 12.54940269048413 | 6.46292377705588  | 17.51707441128562  |
| C | 10.66094748549846 | 7.16616036042053  | 18.34594218320758  |
| H | 10.98576277614552 | 7.04818752101587  | 19.39242035034724  |
| C | 9.37174045671920  | 7.64171767369701  | 18.05506700345993  |
| H | 8.67881156146546  | 7.90310897391982  | 18.87053354489645  |
| C | 8.96446788526106  | 7.79350543111322  | 16.71936242815285  |
| H | 7.96137261238749  | 8.16853693252562  | 16.45821186939558  |
| C | 10.6185488688179  | 8.56051631367860  | 13.144461066633576 |
| C | 11.35731063320678 | 9.51248565119487  | 13.88332057936205  |
| H | 11.22938058714108 | 9.57288183887465  | 14.97279967835972  |
| C | 12.22054696980030 | 10.40723084952744 | 13.22843704478516  |
| H | 12.76709537357851 | 11.16050343050867 | 13.81781035039707  |
| C | 12.38163425776415 | 10.35272896026070 | 11.83530365996663  |
| H | 13.05782548257914 | 11.05700992387846 | 11.32547896657252  |
| C | 11.65805770863252 | 9.39846725449261  | 11.09216562950887  |
| H | 11.76511202847056 | 9.35312845980940  | 9.99660441738004   |
| C | 10.77471830504325 | 8.52641710678748  | 11.74041962019314  |
| H | 10.15821158812248 | 7.83087505378178  | 11.14986254261088  |
| C | 3.99110555494932  | 13.01985677554231 | 13.83971097804736  |
| H | 3.08647183216670  | 13.61796627690435 | 13.64465784296050  |
| C | 11.41922490477768 | 13.43267389624905 | 18.70369197461780  |
| H | 12.34099279121375 | 13.73074119325607 | 19.24799901122180  |
| H | 11.69141001559392 | 12.68305133272226 | 17.93425949380978  |
| H | 10.74564265177189 | 12.82902630495629 | 19.42829994280532  |
| C | 10.72583186638180 | 14.65159384105646 | 18.065122306899609 |
| H | 11.44762346742757 | 15.11605593633449 | 17.35651410927564  |
| C | 10.36478154717358 | 15.71037296242185 | 19.12271290025524  |
| H | 11.26620210013089 | 16.04926772643035 | 19.67673794843063  |
| H | 9.64898332923664  | 15.30331519097819 | 19.86753105608257  |
| H | 9.89001303159169  | 16.59719073327699 | 18.65568851545813  |

## Compound 4.

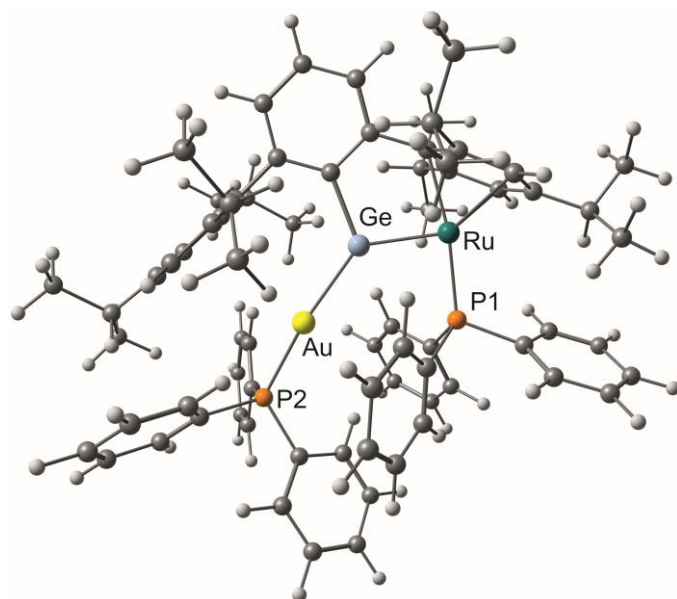

Figure SI42. Optimized structure of 4.

156

Coordinates from ORCA-job bp86optfreq\_hnumac E=-5780.929578887036

|    |                   |                   |                   |
|----|-------------------|-------------------|-------------------|
| Au | 10.93890550219480 | 6.29322969077136  | 6.18929274072640  |
| Ru | 11.09172249462762 | 3.28616810384839  | 3.04981060385656  |
| Ge | 11.93211681567550 | 4.66314081169910  | 4.69587492230781  |
| P  | 9.05069826819675  | 4.11150243276375  | 3.50306263359391  |
| C  | 13.90018846748675 | 4.47302723649629  | 4.46451915420702  |
| P  | 9.7785933688787   | 7.99997641471030  | 7.27566087132815  |
| C  | 14.90245399542960 | 5.14008026113206  | 5.20397353059966  |
| C  | 16.26105043549380 | 4.85279903004309  | 4.95220400667830  |
| H  | 17.03642462129497 | 5.36988384339421  | 5.53958155178010  |
| C  | 16.62311694291178 | 3.92652289126252  | 3.96260332576201  |
| H  | 17.68576060061581 | 3.71030195447822  | 3.77358402208151  |
| C  | 15.62943321125339 | 3.27796719897562  | 3.20838469695828  |
| H  | 15.90857899403354 | 2.55613847657285  | 2.42511777749867  |
| C  | 14.27248213568619 | 3.54704868027124  | 3.45481103698091  |
| C  | 14.52291016412110 | 6.16177863405435  | 6.22571696461619  |
| C  | 14.62790708287859 | 7.54138445795667  | 5.91168201853924  |
| C  | 14.30696429113272 | 8.48988251269558  | 6.90112875511116  |
| H  | 14.40637257307377 | 9.55830469637086  | 6.66837439749904  |
| C  | 13.86174378892150 | 8.10929010200020  | 8.17798208504705  |
| C  | 13.70719990119270 | 6.73747168101576  | 8.44086503011032  |
| H  | 13.33145666584628 | 6.43241338883327  | 9.42922248938692  |
| C  | 14.02645886861431 | 5.75407544568406  | 7.49027085538382  |
| C  | 15.01602497266784 | 7.97582036400603  | 4.49837479729482  |
| H  | 15.77470335061265 | 7.25146104592587  | 4.13605808639104  |
| C  | 13.81197842041729 | 7.86790000877937  | 3.53813055372438  |
| H  | 14.11765665691142 | 8.08564211010235  | 2.49419928726351  |
| H  | 13.01173650817425 | 8.58294032534933  | 3.81437792256887  |
| H  | 13.36667272397720 | 6.85371749742053  | 3.55782468623099  |
| C  | 15.64632093560457 | 9.37329882483304  | 4.42710496163457  |
| H  | 16.00800503837272 | 9.58141931304528  | 3.39986771328999  |
| H  | 16.50460191428854 | 9.47290205937193  | 5.12201192080415  |
| H  | 14.91627928476490 | 10.17081987057241 | 4.68061054207751  |
| C  | 13.61115743640521 | 9.11281393996629  | 9.29504065343693  |
| H  | 12.76341529269820 | 8.71513089064961  | 9.89076059131487  |
| C  | 13.22355782322759 | 10.51447791384221 | 8.80990649850843  |
| H  | 14.06675940203791 | 11.01856840235488 | 8.29247928574456  |
| H  | 12.93800050947544 | 11.15431795317104 | 9.66936799036374  |
| H  | 12.36854287206782 | 10.48419571357196 | 8.10777631620298  |
| C  | 14.83542606230482 | 9.17431529712097  | 10.23160024868982 |
| H  | 15.72580708939346 | 9.55395815468371  | 9.68762524265078  |
| H  | 15.08940895613837 | 8.17080335860542  | 10.62793465588272 |
| H  | 14.64469495585451 | 9.84842560980318  | 11.09300672045567 |
| C  | 13.88738208742123 | 4.27444721732817  | 7.83214961527609  |
| H  | 13.81740940566329 | 3.72383772641280  | 6.87178291927478  |
| C  | 12.60984007489513 | 3.95420001438909  | 8.62134785502229  |
| H  | 11.71884946165158 | 4.34235206811877  | 8.08320698040328  |
| H  | 12.62235153606028 | 4.39543294716781  | 9.64010370938653  |
| H  | 12.49050818592116 | 2.85769254586294  | 8.73811003229403  |
| C  | 15.15226142814876 | 3.77160008629626  | 8.55276144062795  |
| H  | 16.05538463223909 | 3.94400907830104  | 7.93350222384860  |
| H  | 15.08436190398266 | 2.68439925570532  | 8.76679183767955  |
| H  | 15.29608966525536 | 4.30425699287414  | 9.51648523792399  |
| C  | 13.18757337933178 | 2.86361647374856  | 2.67340742260374  |
| C  | 12.58404235370386 | 1.66112390044618  | 3.21053618245018  |
| C  | 11.46590902177870 | 1.08258864734129  | 2.52616541958490  |
| H  | 11.00885647394957 | 0.17084779434923  | 2.92878045713291  |
| C  | 10.93664816046103 | 1.66783511401969  | 1.33898264700190  |
| C  | 11.51443866586475 | 2.87987886400468  | 0.84847780790604  |
| H  | 11.07276415964754 | 3.35083493615909  | -0.04147217425475 |
| C  | 12.62420472605560 | 3.51082602911260  | 1.50052120635640  |
| C  | 13.17874589601700 | 0.97941938965021  | 4.43720565696995  |
| H  | 13.74697776778408 | 1.75655941926682  | 4.98865517960939  |
| C  | 12.12181675533901 | 0.41681962589812  | 5.39502330956045  |
| H  | 11.38800192211150 | 1.20281828955985  | 5.66028364854135  |

|   |                   |                   |                   |
|---|-------------------|-------------------|-------------------|
| H | 12.60022480948047 | 0.04649890984777  | 6.32445569453570  |
| H | 11.56228290459106 | -0.43342030445294 | 4.95273673049148  |
| C | 14.17943469256839 | -0.10232501598881 | 3.98916797979458  |
| H | 13.66663958736705 | -0.89544645396115 | 3.40508015683571  |
| H | 14.66686746285683 | -0.58110329745902 | 4.86350908085668  |
| H | 14.97410083783426 | 0.32810493706393  | 3.34780010216621  |
| C | 9.79886494300258  | 1.02044947225479  | 0.56691740422239  |
| H | 9.17975954172455  | 1.84822206971692  | 0.16205701421295  |
| C | 8.88386439026098  | 0.14220312678777  | 1.42684754620619  |
| H | 7.98996996814067  | -0.16558261200613 | 0.84912637058405  |
| H | 8.53578616898554  | 0.68713959830240  | 2.32465263177062  |
| H | 9.39858561984462  | -0.78412957167658 | 1.75775490159208  |
| C | 10.37238170524467 | 0.23161270561300  | -0.62809508139897 |
| H | 9.55788215413497  | -0.20042531844845 | -1.24618126593092 |
| H | 11.01291000296568 | -0.60331689614905 | -0.27390023801607 |
| H | 10.9949005241453  | 0.87722925902414  | -1.27996955991756 |
| C | 13.26269844719202 | 4.76912796797762  | 0.92913381937977  |
| H | 13.80012850399526 | 5.25670318910635  | 1.76834973259760  |
| C | 14.30684639975284 | 4.38925334397949  | -0.13723454876822 |
| H | 13.82588044115089 | 3.86749348536189  | -0.99143552014742 |
| H | 15.07862124052841 | 3.71216548070741  | 0.27999450709113  |
| H | 14.81983979078357 | 5.29089823186574  | -0.53148417910343 |
| C | 12.23624173620746 | 5.77402956704259  | 0.39231248991430  |
| H | 12.73220931212094 | 6.72885252667473  | 0.12382039641199  |
| H | 11.45967807114465 | 5.97966592212083  | 1.15425285530126  |
| H | 11.72674584856426 | 5.40295166816843  | -0.52155737126830 |
| C | 8.46459413297094  | 4.11164062430770  | 5.26674727756127  |
| C | 7.29837869567675  | 4.78786917505384  | 5.67330127713765  |
| H | 6.69160625037132  | 5.33124587822139  | 4.93784155027652  |
| C | 6.90828921416847  | 4.79895299414840  | 7.01975686817042  |
| H | 6.00480785194983  | 5.35017954601581  | 7.31750755932380  |
| C | 7.68393230290356  | 4.13800685164433  | 7.98585559441580  |
| H | 7.38717357085107  | 4.16732460204787  | 9.04568336778919  |
| C | 8.83176626179042  | 3.43404117453012  | 7.58911421122919  |
| H | 9.44092797424561  | 2.89664901417998  | 8.33179813035332  |
| C | 9.21062083732118  | 3.41701165878596  | 6.23782264766908  |
| H | 10.11079223500100 | 2.87799587745664  | 5.90660711788479  |
| C | 7.63630345851993  | 3.29714706768442  | 2.65996812074475  |
| C | 6.73658730703779  | 2.44405933455642  | 3.32855661603831  |
| H | 6.8252500995878   | 2.30609355233755  | 4.41599196932254  |
| C | 5.73013054711732  | 1.77114659075350  | 2.61627011506303  |
| H | 5.03537989531869  | 1.10582238162540  | 3.15200314069467  |
| C | 5.60688550409417  | 1.94667478155728  | 1.22860194779633  |
| H | 4.81557968738195  | 1.42194814400994  | 0.67163943131804  |
| C | 6.50036246616904  | 2.79773368368745  | 0.55382603504870  |
| H | 6.41047702208532  | 2.94135686880982  | -0.53419625777434 |
| C | 5.71028904559415  | 3.46205569381918  | 1.26346840578142  |
| H | 8.21141594995875  | 4.12784818943235  | 0.73649311369087  |
| C | 6.88330533705585  | 5.89040919906008  | 3.05701916846372  |
| C | 7.38750825427435  | 6.33387071415792  | 2.71375385919648  |
| H | 6.56038726532830  | 5.61206154601788  | 2.65035535587196  |
| C | 7.14023020698828  | 7.68807335761207  | 2.43243747652373  |
| H | 6.12483425245084  | 8.00866410184568  | 2.15084719947906  |
| C | 8.17901570296239  | 8.63121956122323  | 2.51397269308065  |
| H | 7.98142402363107  | 9.69479579067913  | 2.31124664937873  |
| C | 9.47410703953439  | 8.20165019513432  | 2.84705524477972  |
| H | 10.30149867040452 | 8.92410798088691  | 2.91268309392482  |
| C | 9.72062370520276  | 6.84195076543190  | 3.09086271115680  |
| H | 10.74371598681664 | 6.49790014956345  | 3.30036601177192  |
| C | 7.96282779819709  | 7.98105152008222  | 7.22930816119937  |
| C | 7.16303541142363  | 7.96151781366573  | 8.38666837934612  |
| H | 7.63249241301167  | 7.93885256388685  | 9.38032652714612  |
| C | 5.76333219784246  | 7.97677242319189  | 8.26946296472106  |
| H | 5.14052190404423  | 7.96177445801328  | 9.17694304410884  |
| C | 5.16077321931560  | 8.01470192989204  | 7.00109523727756  |
| H | 4.06380654594810  | 8.03077461884213  | 6.91221243218616  |
| C | 5.96219386288228  | 8.02643832219418  | 5.84539738903680  |
| H | 5.50359262150863  | 8.04523249706917  | 4.84576686343641  |
| C | 7.35707330621897  | 7.99982576085967  | 5.95664310510164  |
| H | 7.98093921926574  | 7.99490552166797  | 5.05192544001341  |
| C | 10.16287585596453 | 9.59833828542519  | 6.49493301102989  |
| C | 11.36763317343988 | 9.70071084385694  | 5.77428190831297  |
| H | 12.02703185452903 | 8.82202935454526  | 5.71629428058548  |
| C | 11.71278787371348 | 10.90410785165261 | 5.14324023179762  |
| H | 12.65617227860958 | 10.97277933631141 | 4.58070074663720  |
| C | 10.85250982283092 | 12.01120795355702 | 5.22471434176799  |
| H | 11.11966573436895 | 12.95516447926788 | 4.72550718064904  |
| C | 9.64322507940665  | 11.91057777394284 | 5.93526792085368  |
| H | 8.96303426459061  | 12.77412898192481 | 5.99157742267251  |
| C | 9.29451862836452  | 10.70693523687775 | 6.56597366967666  |
| H | 8.33579444526389  | 10.62030778184574 | 7.09858098430453  |
| C | 10.16136606753689 | 8.17742553544663  | 9.04346328040501  |
| C | 10.10952341814109 | 9.41012046647304  | 9.72201014539839  |
| H | 9.87191602616460  | 10.33113577140808 | 9.17070128723170  |
| C | 10.38204305647572 | 9.46452107646053  | 11.09711750718408 |
| H | 10.35309784261677 | 10.43119228111829 | 11.62221747481672 |
| C | 10.70127872935238 | 8.28984235099895  | 11.80001373771165 |
| H | 10.92254737042155 | 8.33679990790043  | 12.87710068422637 |
| C | 10.74622198349788 | 7.05730163651177  | 11.12616983054168 |
| H | 11.00099059256308 | 6.13630594732887  | 11.67192473372952 |
| C | 10.48102014798277 | 7.00099023189442  | 9.75010362308089  |
| H | 10.53290032226396 | 6.04575043391390  | 9.20673134073157  |

## Compound 5.

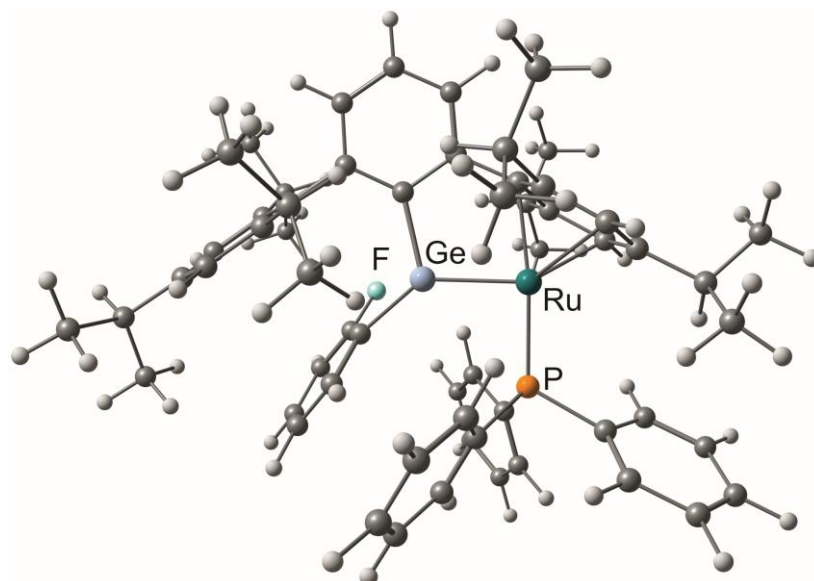

Figure SI43. Optimized structure of 5.

132  
Coordinates from ORCA-job bp86optfreq\_hnumac E -4939.637810182548

|    |                   |                   |                   |
|----|-------------------|-------------------|-------------------|
| Ru | 5.54982084850912  | 2.17091256884478  | 8.00447620347388  |
| Ge | 3.86963807774423  | 3.65472077204142  | 8.46467819286517  |
| P  | 6.03985970104469  | 3.25661213460371  | 6.09374781440579  |
| F  | 4.41655268343535  | 6.39673174423899  | 9.60309446856605  |
| C  | 3.28482275990124  | 3.22154364303926  | 10.30546394206210 |
| C  | 2.18304490138123  | 3.74442446018908  | 11.02477039234881 |
| C  | 1.90500785221711  | 3.24318765025456  | 12.31393659480609 |
| H  | 1.03157255337007  | 3.62791583576989  | 12.86070776478958 |
| C  | 2.7045833363404   | 2.24473682017434  | 12.88770380698715 |
| H  | 2.47417447818810  | 1.86722418454370  | 13.89557994488828 |
| C  | 3.77670037511659  | 1.70037818174811  | 12.16169484474305 |
| H  | 4.38240984164284  | 0.88718234878379  | 12.59024410239303 |
| C  | 4.06129530870020  | 2.17253868477523  | 10.86930915019910 |
| C  | 1.27714313004232  | 4.73913776068688  | 10.37536957473981 |
| C  | 1.24619631837911  | 6.09586853810811  | 10.80013964925605 |
| C  | 0.39754897813438  | 6.99116924226643  | 10.13128026598599 |
| H  | 0.36212473401838  | 8.04166946217939  | 10.46136914767071 |
| C  | -0.43255235176193 | 6.59462879093274  | 9.06696335487264  |
| C  | -0.38694346576180 | 5.25078399765752  | 8.67030210264704  |
| H  | -1.03649755010047 | 4.90652825022790  | 7.85266126209905  |
| C  | 4.44557443385828  | 4.31238521093389  | 9.3077791817457   |
| C  | 2.04552960590307  | 6.57372309999392  | 12.01051073441035 |
| H  | 2.85336303566165  | 5.83347389365795  | 12.18593907224132 |
| C  | 2.70873351344937  | 7.94731962684887  | 11.81583405002634 |
| H  | 3.37392275107651  | 7.95103677919302  | 10.93435039989331 |
| H  | 3.31937322512165  | 8.20473950810865  | 12.70570711172622 |
| H  | 1.95863632044847  | 8.75601150724606  | 11.69338845163172 |
| C  | 1.14328687265609  | 6.60091683457988  | 13.26222462446452 |
| H  | 0.32570560087634  | 7.34133080677711  | 13.13521206599677 |
| H  | 1.72387840072128  | 6.88403635485882  | 14.16500928409467 |
| H  | 0.67030119583261  | 5.61825866548492  | 13.45353633502428 |
| C  | -1.34840359561941 | 7.62336220958800  | 8.41062282950191  |
| H  | -1.75739064931561 | 8.24521698783396  | 9.23942203956950  |
| C  | -0.55084044647599 | 8.56109830560777  | 7.48480154852204  |
| H  | -0.12834963901059 | 7.99269181703725  | 6.63235720267838  |
| H  | 0.30173693179651  | 9.02752269289308  | 8.01675378570753  |
| H  | -1.19730110040478 | 9.36894208187719  | 7.08251811620567  |
| C  | -2.53959749515989 | 7.00743559019074  | 7.66479179426787  |
| H  | -3.22738490130510 | 7.80114363344332  | 7.30877444187590  |
| H  | -3.1175562453774  | 6.31629172482830  | 8.31104416856053  |
| H  | -2.20822680166195 | 6.43896209927208  | 6.77055451347749  |
| C  | 0.33558466040341  | 2.84239473816076  | 8.90251512931807  |
| H  | 1.10309251885274  | 2.27646897980257  | 9.46623670877524  |
| C  | 0.60774125929620  | 2.60457399326363  | 7.40910493628983  |
| H  | -0.05173158229287 | 3.21475889002143  | 6.75855729477571  |
| H  | 0.45128697087041  | 1.53918284926904  | 7.14641987378695  |
| H  | 1.65877642359361  | 2.85227564884366  | 7.14778915135704  |
| C  | -1.03550286653586 | 2.27965007400027  | 9.32482822403213  |
| H  | -1.86404427885532 | 2.78589815952369  | 8.78684777550984  |
| H  | -1.20466559642571 | 2.42315800700480  | 10.41101092961546 |
| H  | -1.10160349259832 | 1.19352000715433  | 9.10487704739309  |
| C  | 5.11881016991940  | 1.51036461425704  | 10.02969871132038 |
| C  | 4.71031951530691  | 0.44914192519862  | 9.13012743094018  |
| C  | 5.67216771410088  | -0.11143330812631 | 8.22978450548814  |
| H  | 5.36654486819430  | -0.91785826700064 | 7.55298090522710  |
| C  | 7.01632898960405  | 0.35951995544157  | 8.20017969771167  |
| C  | 7.39925310878217  | 1.42368606956408  | 9.07765553666721  |
| H  | 8.42771236019482  | 1.80612442063289  | 9.01930854363562  |
| C  | 6.47609698327487  | 2.02952626173351  | 9.98998153179847  |
| C  | 3.29398013193745  | -0.11143841779737 | 9.18105375842175  |
| H  | 2.65107176412283  | 0.67831780743669  | 9.61974293227616  |
| C  | 2.72289439431716  | -0.45237875235483 | 7.79966135919231  |
| H  | 2.79673822684733  | 0.42330892842453  | 7.12658015749896  |
| H  | 1.65610074318131  | -0.74203783434318 | 7.88607357799890  |
| H  | 3.25401432459907  | -1.30128071605969 | 7.32152145479033  |

|   |                   |                   |                   |
|---|-------------------|-------------------|-------------------|
| C | 3.25781517830764  | -1.32426667376910 | 10.12958622541302 |
| H | 2.22655572542571  | -1.72182722267373 | 10.22513645828385 |
| H | 3.61432644559667  | -1.05223171194638 | 11.14264435137459 |
| H | 3.90728985334308  | -2.14095599729380 | 9.74996824022370  |
| C | 8.06226884967169  | -0.27319186459996 | 7.29823935061013  |
| H | 8.73373069837457  | 0.54589913455899  | 6.96804091183952  |
| C | 8.90516176611704  | -1.27264290258428 | 8.11652021146581  |
| H | 8.27433812589321  | -2.10929547189140 | 8.48362610242569  |
| H | 9.36586027078637  | -0.78765357619364 | 9.00075857157575  |
| H | 9.71846766970653  | -1.70358862752012 | 7.49670855735421  |
| C | 7.48411875258516  | -0.92804222295667 | 6.03908272569791  |
| H | 6.80435853331822  | -0.23652806180998 | 5.50601010799917  |
| H | 6.92281059070986  | -1.85529845749077 | 6.27919372237195  |
| H | 8.29857683541614  | -1.20606445860281 | 5.34148106643911  |
| C | 6.91771982699674  | 3.11673500561850  | 10.95914478109817 |
| H | 6.02061321110634  | 3.73821488196648  | 11.16317385720496 |
| C | 8.00664642632188  | 4.03129998682040  | 10.38402006721161 |
| H | 8.98363470907625  | 3.51036388165449  | 10.30344858283200 |
| H | 8.16062427252888  | 4.90950619965946  | 11.04256195751886 |
| H | 7.72853035034327  | 4.39471705102007  | 9.37630745657303  |
| C | 7.36841778918325  | 2.48058776634989  | 12.28826003357197 |
| H | 8.24251914920015  | 1.81515456553050  | 12.12653670242656 |
| H | 6.56063077686447  | 1.87465517299195  | 12.74292941855305 |
| H | 7.66256398032546  | 3.26080863927189  | 13.02015074613768 |
| C | 4.61628797383322  | 3.50027318288587  | 4.94090212640829  |
| C | 4.45161342344762  | 4.62259824735246  | 4.10864562061414  |
| H | 5.19243310937085  | 5.43318230467388  | 4.12351660283730  |
| C | 3.31882911155266  | 4.73657629365188  | 3.28601827268497  |
| C | 3.19258539370675  | 5.63127028394097  | 2.65715820695243  |
| C | 2.34226003241106  | 3.72802961213731  | 3.27958793641473  |
| H | 1.45021263240897  | 3.82536235024878  | 2.64177956779432  |
| C | 2.50647849765639  | 2.59577081791425  | 4.09746170578403  |
| H | 1.74629509734996  | 1.79974675197620  | 4.10247064472168  |
| C | 3.63313592790339  | 2.48914160022489  | 4.92544696579513  |
| H | 3.75972340944460  | 1.63280821128505  | 5.60575500606512  |
| C | 7.27702491475134  | 2.48205142687904  | 4.97679680739464  |
| C | 6.9339553290732   | 1.85077829718822  | 3.76610021817453  |
| H | 5.88741141405579  | 1.85536842828956  | 3.42671832960575  |
| C | 7.91910642987506  | 1.22022989471270  | 2.98882997550096  |
| H | 7.63697772794768  | 0.72994578783528  | 2.04430354395632  |
| C | 9.25880207376981  | 1.21984473889353  | 3.40891675147018  |
| H | 10.03095516007715 | 0.72892018654393  | 2.79706320474118  |
| C | 9.61109281152567  | 1.85776419266301  | 4.61174492809203  |
| H | 10.66078536695379 | 1.86895989380844  | 4.94385677512214  |
| C | 8.62648618999565  | 2.48097637407585  | 5.39099945230272  |
| H | 8.90186619213786  | 2.98869822317490  | 6.32860517309800  |
| C | 6.75959760085891  | 4.95770939595708  | 6.18001583613783  |
| C | 7.44948177749873  | 5.53291281919900  | 5.08988328135508  |
| H | 7.61186702714522  | 4.94691495436780  | 4.17305420087763  |
| C | 7.93990074012232  | 6.84468471018127  | 5.17215296158319  |
| H | 8.47645697550107  | 7.28175209596950  | 4.31570783239197  |
| C | 7.75036528156414  | 7.59848490493014  | 6.34427726347008  |
| H | 8.13557239065675  | 8.62805477060945  | 6.40600546841665  |
| C | 7.08002950173822  | 7.02756745536539  | 7.43678281028168  |
| H | 6.93143546001553  | 7.59981546127741  | 8.36484190635385  |
| C | 6.59784098816445  | 5.7129594776568   | 7.35208068291915  |
| H | 6.09671384396357  | 5.24285286808359  | 8.21032112000838  |
| C | 3.2466908554893   | 5.39348943345653  | 7.79989445634098  |
| C | 2.55752668286893  | 5.57529860369899  | 6.58490991300967  |
| H | 2.19263141594540  | 4.69977497357178  | 6.03104007414806  |
| C | 2.3489595773492   | 6.85773386478576  | 6.05607887945329  |
| H | 1.82186284357591  | 6.96962185916266  | 5.09716186703961  |
| C | 2.82678706541015  | 7.98867656152291  | 6.73726108174963  |
| H | 2.67096397192384  | 8.99532226104526  | 6.32146559276711  |
| C | 3.50676196622240  | 7.84028026606137  | 7.95602856033297  |
| H | 3.90229432947628  | 8.70363522137224  | 8.50913410757487  |
| C | 3.69903381134564  | 6.54785236977768  | 8.44711784029283  |

## Compound 6.

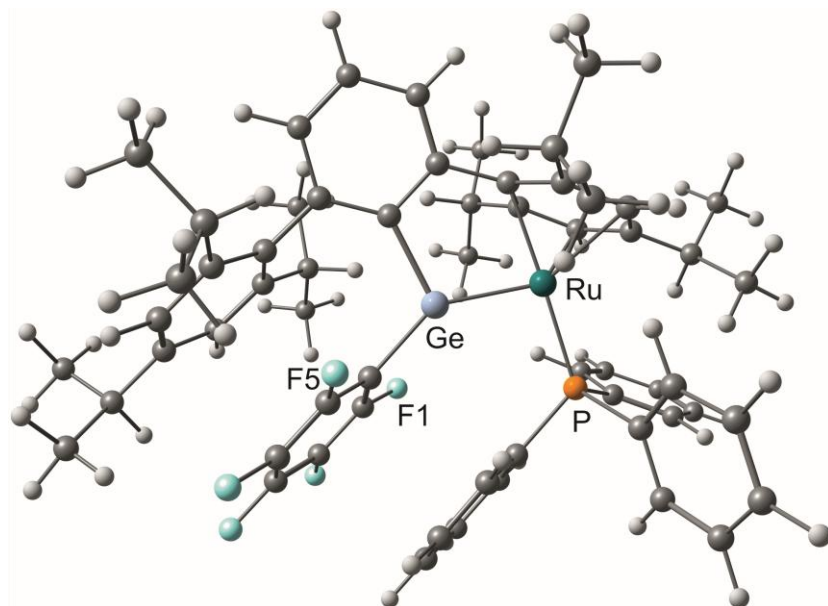

Figure SI44. Optimized structure of 6.

132

Coordinates from ORCA-job bp86optfreq\_hnumac E -5336.281969821012

|    |                    |                   |                   |
|----|--------------------|-------------------|-------------------|
| Ru | 12.52312808637063  | 10.04873762687408 | 3.81238254973482  |
| Ge | 12.93226364853443  | 7.82754979687568  | 4.09607194747880  |
| P  | 14.62145708677344  | 10.74524974091367 | 4.25793171766898  |
| F  | 15.30723040246345  | 7.13568883346401  | 2.12634153563904  |
| C  | 11.20226643378918  | 6.90027956866577  | 3.75936467479872  |
| F  | 17.29909287047239  | 5.29378055006428  | 2.37176688540031  |
| C  | 10.88123795373032  | 5.52023055838216  | 3.73617595259441  |
| F  | 17.48118078253935  | 3.76428878469718  | 4.63844526971168  |
| C  | 9.53413933864007   | 5.13479400909100  | 3.54535245650019  |
| H  | 9.29350017589261   | 4.06241377004548  | 3.51082390181509  |
| F  | 15.67267675857333  | 4.09617734108979  | 6.67909130459716  |
| C  | 8.52164120085282   | 6.08085835655533  | 3.34988049227949  |
| H  | 7.48206172759388   | 5.75319256685938  | 3.19830074573991  |
| F  | 13.66885844094083  | 5.95097076581703  | 6.41791267416989  |
| C  | 8.84707963090715   | 7.44590158530351  | 3.30225339219123  |
| H  | 8.07178853785202   | 8.19925856676632  | 3.09483617612129  |
| C  | 10.17416308883206  | 7.85605003786509  | 3.50366967118872  |
| C  | 11.93254201678128  | 4.45633664683952  | 3.80749956563280  |
| C  | 12.80931092534605  | 4.26583804520691  | 2.69619778733803  |
| C  | 13.79212458823163  | 3.26990395275396  | 2.78629938867857  |
| H  | 14.48793634670773  | 3.12278806106864  | 1.94804316620459  |
| C  | 13.94191642529648  | 2.45130521271178  | 3.92067090846664  |
| C  | 13.05773431850016  | 2.64380843310245  | 4.98909979018950  |
| H  | 13.15664172424232  | 2.02283250090525  | 5.88962902253076  |
| C  | 12.05127374397945  | 3.62981366919008  | 4.95453264024217  |
| C  | 12.691736033905410 | 5.10980768003126  | 1.42232735209258  |
| H  | 12.66374976226721  | 6.17638961101605  | 1.73993179982169  |
| C  | 11.38102477262649  | 4.82838369866047  | 0.65922351934692  |
| H  | 11.32588731571716  | 5.45758466447282  | -0.25325293828481 |
| H  | 10.48361638705923  | 5.03815683477240  | 1.26827101675072  |
| H  | 11.33953427802794  | 3.76527011156453  | 0.34268856161202  |
| C  | 13.87178809806765  | 4.95297029757951  | 0.45261876725150  |
| H  | 13.88342710949018  | 3.94335643186636  | -0.00857975647800 |
| H  | 14.85260616688496  | 5.12004777485188  | 0.93265650627028  |
| H  | 13.77804909539937  | 5.68910954288399  | -0.37047099192221 |
| C  | 15.02778385034616  | 1.38184643551477  | 3.92006928451058  |
| H  | 15.91643859764861  | 1.83922993240487  | 3.42969857821157  |
| C  | 15.45840301906028  | 0.92581501790465  | 5.31984236472000  |
| H  | 15.75337018950190  | 1.78350817607060  | 5.95332275001418  |
| H  | 16.32218799352136  | 0.23410128066343  | 5.25161292388653  |
| H  | 14.64330272976947  | 0.37972870388550  | 5.83940581706049  |
| C  | 14.58765758590763  | 0.18080034261056  | 3.05761013596472  |
| H  | 14.32033116779304  | 0.49540436355935  | 2.02890969781922  |
| H  | 13.69399618842199  | -0.30641921265301 | 3.50091238432150  |
| H  | 15.39455002231228  | -0.57817820012751 | 2.98793596085315  |
| C  | 11.10256002262003  | 3.75932596017841  | 6.14501496817470  |
| H  | 10.64305468136165  | 4.76858270857450  | 6.09235869415780  |
| C  | 9.97197810026511   | 2.71291584814724  | 6.05337861517481  |
| H  | 9.39736037308101   | 2.79781822885638  | 5.11153521167557  |
| H  | 9.26092413151267   | 2.82359530158655  | 6.89852355796384  |
| H  | 10.39261486814732  | 1.68623181391627  | 6.09393978355600  |
| C  | 11.80664313255743  | 3.63234341209560  | 7.50868494312358  |
| H  | 12.14456724169058  | 2.59211533545398  | 7.69820507338388  |
| H  | 11.10477888050967  | 3.8954128330983   | 8.32640750230832  |
| H  | 12.68875840587549  | 4.29307865169906  | 7.57816415034988  |
| C  | 10.52900802611023  | 9.30986862309430  | 3.36636373413445  |
| C  | 10.41627887059157  | 10.21287169996645 | 4.49500219790585  |
| C  | 10.89220943894537  | 11.55664968276817 | 4.35156073043405  |
| H  | 10.80331797904243  | 12.24898690430389 | 5.19871242148118  |
| C  | 11.51097568448376  | 12.00380051068597 | 3.14123432672964  |
| H  | 11.62935216693684  | 11.09208053974663 | 2.04518877551528  |
| H  | 12.13131066406740  | 11.43522845857472 | 1.12946858728757  |
| C  | 11.14764510797725  | 9.74716904165405  | 2.12526499449987  |

|   |                    |                   |                   |
|---|--------------------|-------------------|-------------------|
| C | 9.74219439672701   | 9.75398619511537  | 5.78082061055337  |
| H | 9.72344726559683   | 8.64516703822098  | 5.74681612056278  |
| C | 8.28360768646321   | 10.24934992383355 | 5.80293839460356  |
| H | 8.24239679418121   | 11.35864248810001 | 5.83021049953728  |
| H | 7.74750533965452   | 9.86531630330415  | 6.69493794025980  |
| H | 7.73052676838859   | 9.91604619812772  | 4.90213003540950  |
| C | 10.50530830627648  | 10.15838493284293 | 7.04810328848842  |
| H | 11.54527564165260  | 9.77928934596913  | 7.00659795883130  |
| H | 10.00987840984281  | 9.73889804815152  | 7.94706332777488  |
| H | 10.54256246310158  | 11.26010467110594 | 7.18061680237393  |
| C | 12.01397709220355  | 13.42679079710564 | 2.94350175054978  |
| H | 12.93606273693508  | 13.34931605437378 | 2.32882744742898  |
| C | 12.37950368258342  | 14.15627221541866 | 4.23892423148802  |
| H | 12.83936629952745  | 15.13763746122142 | 4.00778239841657  |
| H | 13.10287751815697  | 13.57823830708195 | 4.84330042960938  |
| H | 11.48675477131695  | 14.35289100545321 | 4.86900362093960  |
| C | 10.97189593386381  | 14.22288647819341 | 2.13118340065242  |
| H | 11.34201786052504  | 15.24519230878942 | 1.91075585584340  |
| H | 10.02119577793423  | 14.3168894719528  | 2.69684706233466  |
| H | 10.74129904200514  | 13.72609756827922 | 1.16744302849029  |
| C | 11.20895182847672  | 8.82608602280630  | 0.91345141104814  |
| H | 11.07594195565607  | 7.79187516673828  | 1.28785663297761  |
| C | 10.01898296535523  | 9.13599919702379  | -0.01354951920977 |
| H | 10.08600536234237  | 10.16853989211765 | -0.41649770795975 |
| H | 9.05685397182401   | 9.04697554674206  | 0.52981071491004  |
| H | 9.99360437881143   | 8.43326683656124  | -0.87133569673684 |
| C | 12.550482289895740 | 8.86954515680623  | 0.17338547318266  |
| H | 12.55533511167434  | 8.13124523749338  | -0.65356234186694 |
| H | 13.37936887164129  | 8.62501257261460  | 0.86647990821016  |
| H | 12.75287535663358  | 9.86463366773958  | -0.27463414295743 |
| C | 14.91705096954699  | 11.68051610324572 | 5.82091773168700  |
| C | 13.83037334506006  | 11.94490305784653 | 6.67057423386490  |
| H | 12.83775610124051  | 11.58377440848296 | 6.36401889598569  |
| C | 14.01978318077230  | 12.62911429250003 | 7.88240929039698  |
| H | 13.16021075643961  | 12.82581423116257 | 8.54153486844895  |
| C | 15.30604611440382  | 13.05140797505350 | 8.25321238148822  |
| H | 15.46034356454112  | 13.58559696095407 | 9.20343923156442  |
| C | 16.40260440066003  | 12.77760558702080 | 7.41477515748934  |
| H | 17.41461725911413  | 13.09554033195353 | 7.70961612402045  |
| C | 16.21117713406023  | 12.08906286901468 | 6.20851435889224  |
| H | 17.07415991451458  | 11.85471395548120 | 5.56678670172367  |
| C | 15.19424417204277  | 11.91517413455651 | 2.95853551799656  |
| C | 15.61598979019952  | 13.23525829129724 | 3.20456187183100  |
| H | 15.71302171613424  | 13.59828147545879 | 4.23700164222138  |
| C | 15.88441421179760  | 14.10693631754789 | 2.13452537248484  |
| H | 16.19397627291892  | 15.14281331480338 | 2.34243457171251  |
| C | 15.75587301663207  | 13.66383301667723 | 0.80939688581790  |
| H | 15.96651250479723  | 14.34858579507507 | -0.02632064558371 |
| C | 15.34922758804824  | 12.34099087145502 | 0.55490032975120  |
| H | 15.24412600511715  | 11.98345511945486 | -0.48107383986649 |
| C | 15.05618099006705  | 11.48070607763093 | 1.62117684756748  |
| H | 14.67835440876635  | 10.46515436084249 | 1.43104080278129  |
| C | 16.01453162100095  | 9.55847401732679  | 4.41723886889691  |
| C | 16.99230718909412  | 9.36323016286537  | 3.42577869018479  |
| H | 16.95080248981813  | 9.93962312559841  | 2.49115682328334  |
| C | 18.02702524644285  | 8.43430711838669  | 3.62546978208146  |
| H | 18.77866741297425  | 8.27866083386535  | 2.83716739364093  |
| C | 18.10235442254551  | 7.70536888335244  | 4.82278394620067  |
| H | 18.91256677423145  | 6.97620776198942  | 4.97510726325436  |
| C | 17.1336422234813   | 7.90226871666247  | 5.82150494159787  |
| H | 17.18386403679116  | 7.3333885647436   | 6.76207879758173  |
| C | 16.09215302978057  | 8.81581795403423  | 5.61542750355090  |
| H | 15.32910302006781  | 8.96452302602201  | 6.39463365305106  |
| C | 14.40645367640596  | 6.53731130216867  | 4.24887266107285  |
| C | 15.36618209093709  | 6.38513408366866  | 3.24925380834311  |
| C | 16.40337380107175  | 5.45040174995607  | 3.35852120695286  |
| C | 16.49563962628573  | 4.66565833546613  | 4.51859802242113  |
| C | 15.56810264373229  | 4.83109532782810  | 5.55984159640556  |
| C | 14.54100400597741  | 5.76609961221905  | 5.40057615486629  |

## References

1. L. Pu, M. M. Olmstead, P. P. Power and B. Schiemenz, *Organometallics*, 1998, **17**, 5602–5606.
2. P. Nie, Q. Yu, H. Zhu and T.-B. Wen, *Eur J Inorg Chem*, 2017, 4784–4796.
3. R. K. Harris, E. D. Becker, S. M. C. d. Menezes, R. Goodfellow and P. Granger, *Pure Appl. Chem.*, 2001, **73**, 1795–1818.
4. L. J. Farrugia, *Appl. Crystallogr.*, 1997, **30**, 565.
5. L. J. Farrugia, *Appl. Crystallogr.*, 1999, **32**, 837–838.
6. L. J. Farrugia, *Appl. Crystallogr.*, 2012, **45**, 849–854.
7. C. B. Hübschle, G. M. Sheldrick and B. Dittrich, *J Appl Crystallogr*, 2011, **44**, 1281–1284.
8. G. M. Sheldrick, *Journal*, 1997, Program of the Crystal Structure Refinement.
9. G. M. Sheldrick, *Acta Cryst. A*, 2008, **64**, 112–122.
10. G. M. Sheldrick, *Journal*, 1996.
11. F. Neese, *WIREs Comput. Mol. Sci.*, 2018, **8**, e1327.
12. F. Neese, *WIREs Comput. Mol. Sci.*, 2012, **2**, 73–78.
13. F. Neese, *WIREs Comput. Mol. Sci.*, 2022, **12**, e1606.
14. A. D. Becke, *Phys. Rev. A*, 1988, **38**, 3098–3100.
15. J. P. Perdew and W. Yue, *Phys. Rev. B*, 1986, **33**, 8800–8802.
16. S. Grimme, S. Ehrlich and L. Goerigk, *J. Comput. Chem.*, 2011, **32**, 1456–1465.
17. F. Weigend, *Phys. Chem. Chem. Phys.*, 2006, **8**, 1057–1065.
18. F. Weigend and R. Ahlrichs, *Phys. Chem. Chem. Phys.*, 2005, **7**, 3297–3305.
19. B. Metz, H. Stoll and M. Dolg, *J. Chem. Phys.*, 2000, **113**, 2563–2569.
20. D. Andrae, U. Häussermann, M. Dolg, H. Stoll and H. Preuß, *Theoret. Chim. Acta*, 1990, **77**, 123–141.
21. G. A. Zhurko, *CHEMCRAFT* (<http://www.chemcraftprog.com>).
22. E. D. Glendening, J. K. Badenhoop, A. E. Reed, J. E. Carpenter, J. A. Bohmann, C. M. Morales, P. Karafiloglou, C. R. Landis and F. Weinhold, *Journal*, 2018.
23. T. Yanai, D. P. Tew and N. C. Handy, *Chem. Phys. Lett.*, 2004, **393**, 51–57.
